# Supplementary material for: Genome-Wide Identification, Structure Characterization, Expression Pattern Profiling, and Substrate Specificity of the Metal Tolerance Protein Family in Canavalia rosea (Sw.) DC
Source: MDPI journal article supplement (doi:10.3390/plants10071340), 2021-06-30
Supplement: s1 [file s1]

## Supplementary Material Information

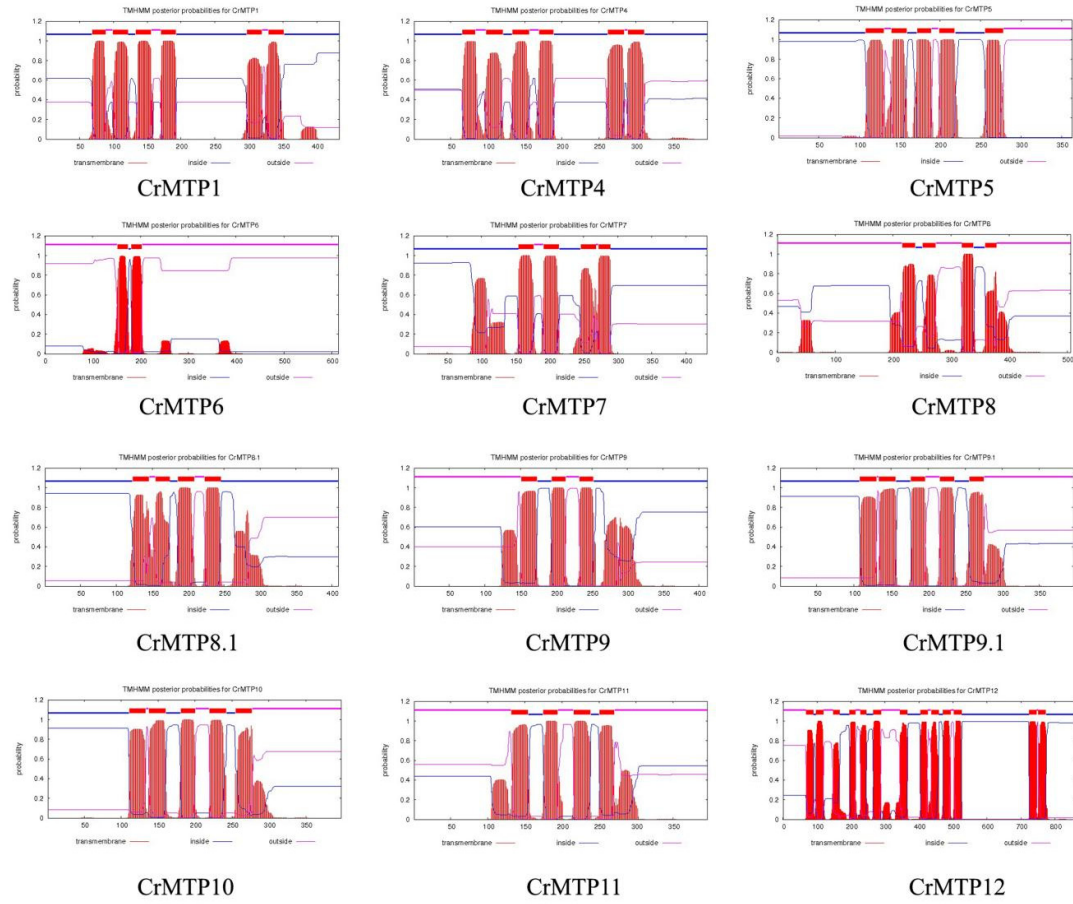

(A)

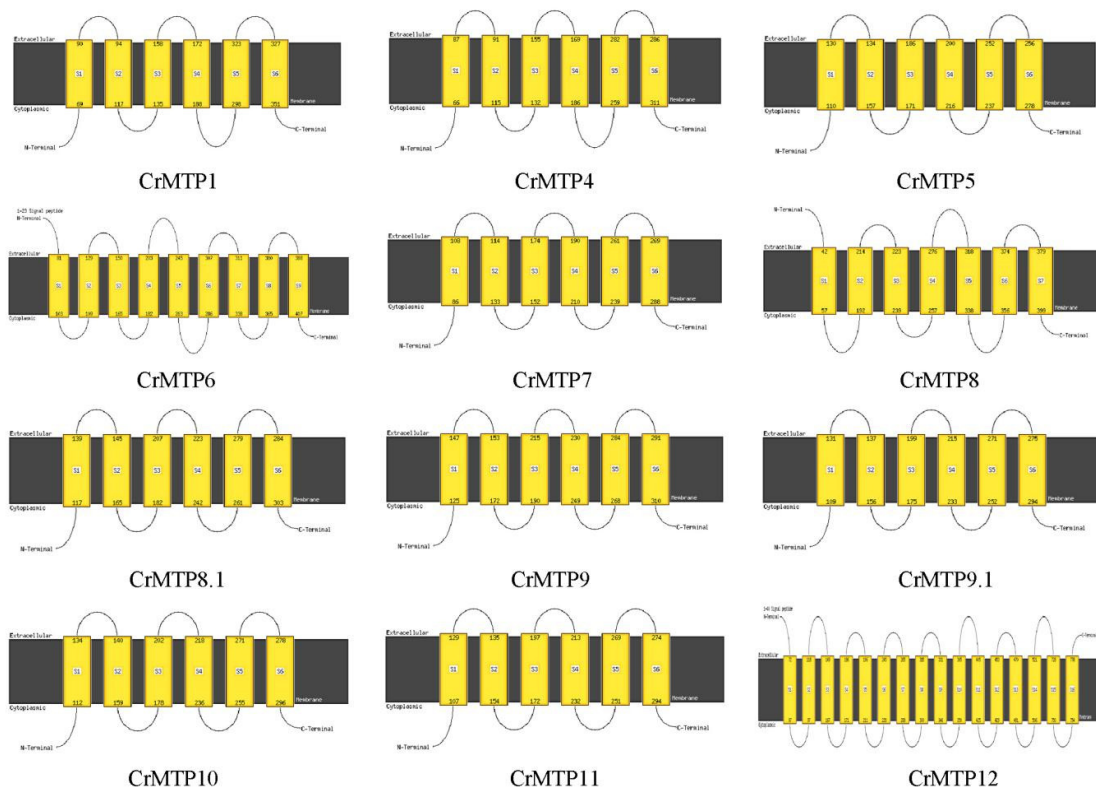

(B)

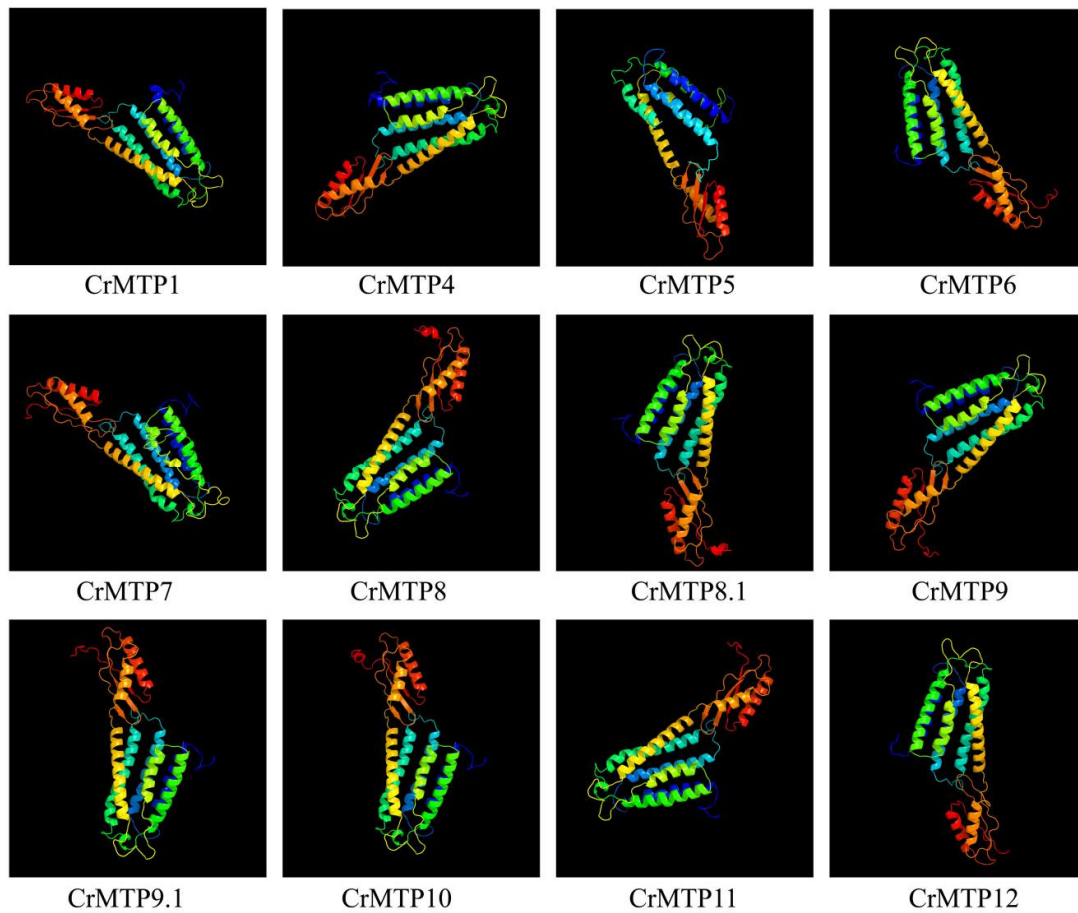

(C)

**Figure S1.** The molecular structures of CrMTPs. The putative transmembrane helices (TMHs) predicted using TMHMM Server V. 2.0 (<http://www.cbs.dtu.dk/services/TMHMM/>) (A), or TMHs structures (B), and 3D models (C) of CrMTPs constructed using Phyre2 (<http://www.sbg.bio.ic.ac.uk/~phyre2/html/page.cgi?id=index>).

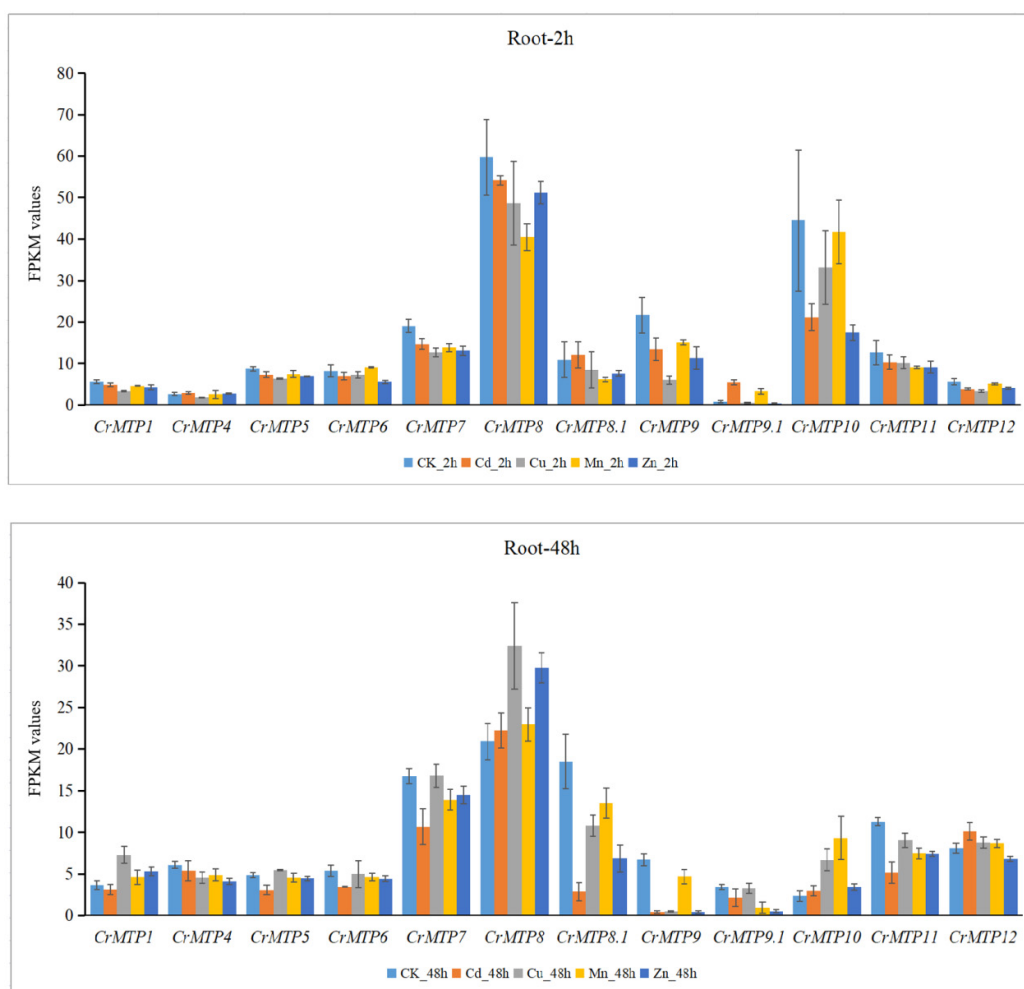

(A)

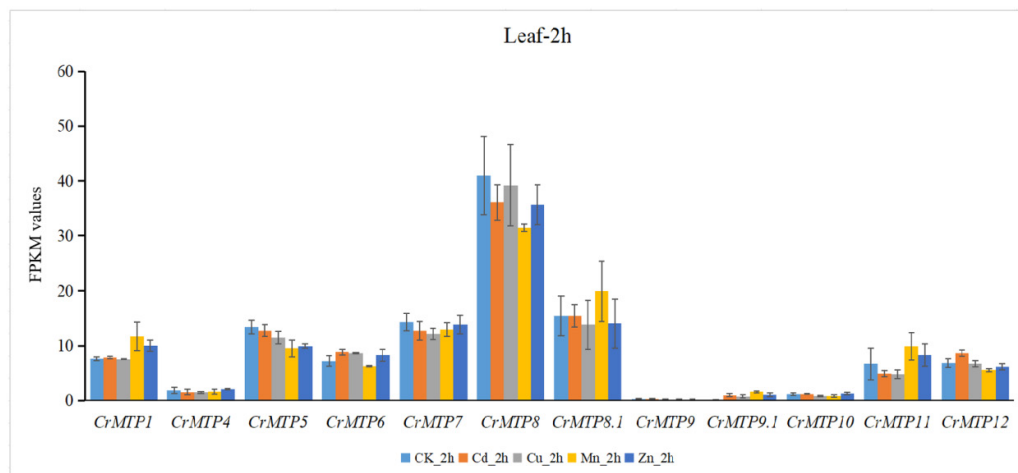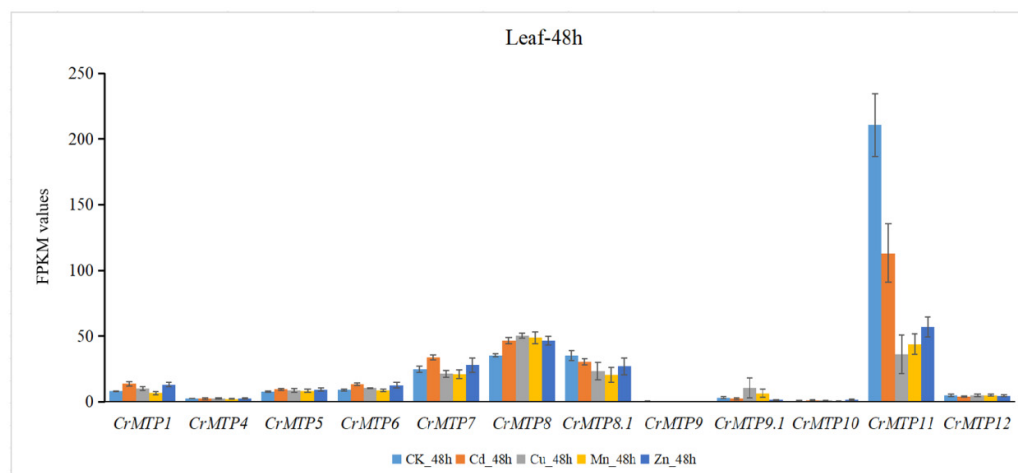

(B)

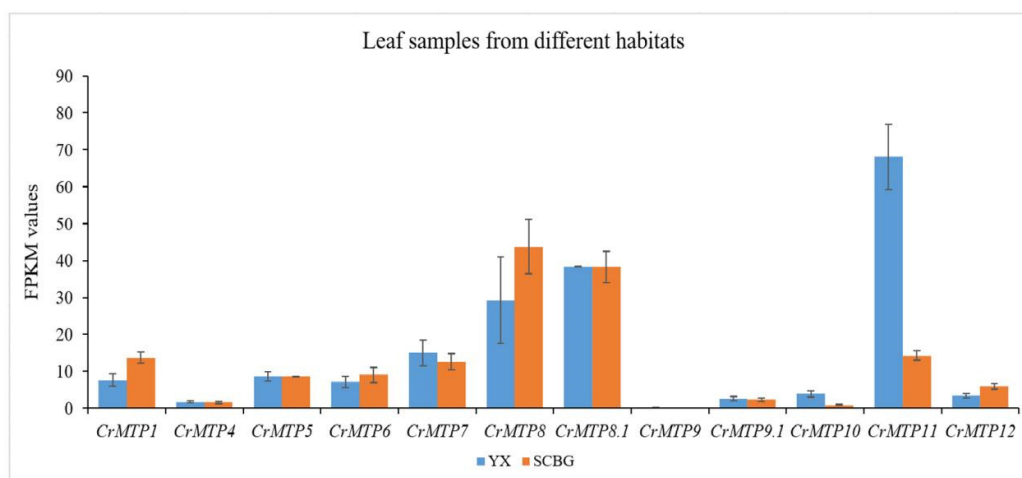

(C)

**Figure S2.** The FPKM values histogram of RNA-seq data in this study. (A) the expression patterns of *CrMTPs* under different HM challenges for 2 h or 48 h in root samples; (B) the expression patterns of *CrMTPs* under

different HM challenges for 2 h or 48 h in leaf samples; (C) the expression patterns of *CrMTPs* in leaf samples captured from YX Island (YX) and South China Botanical Garden (SCBG).

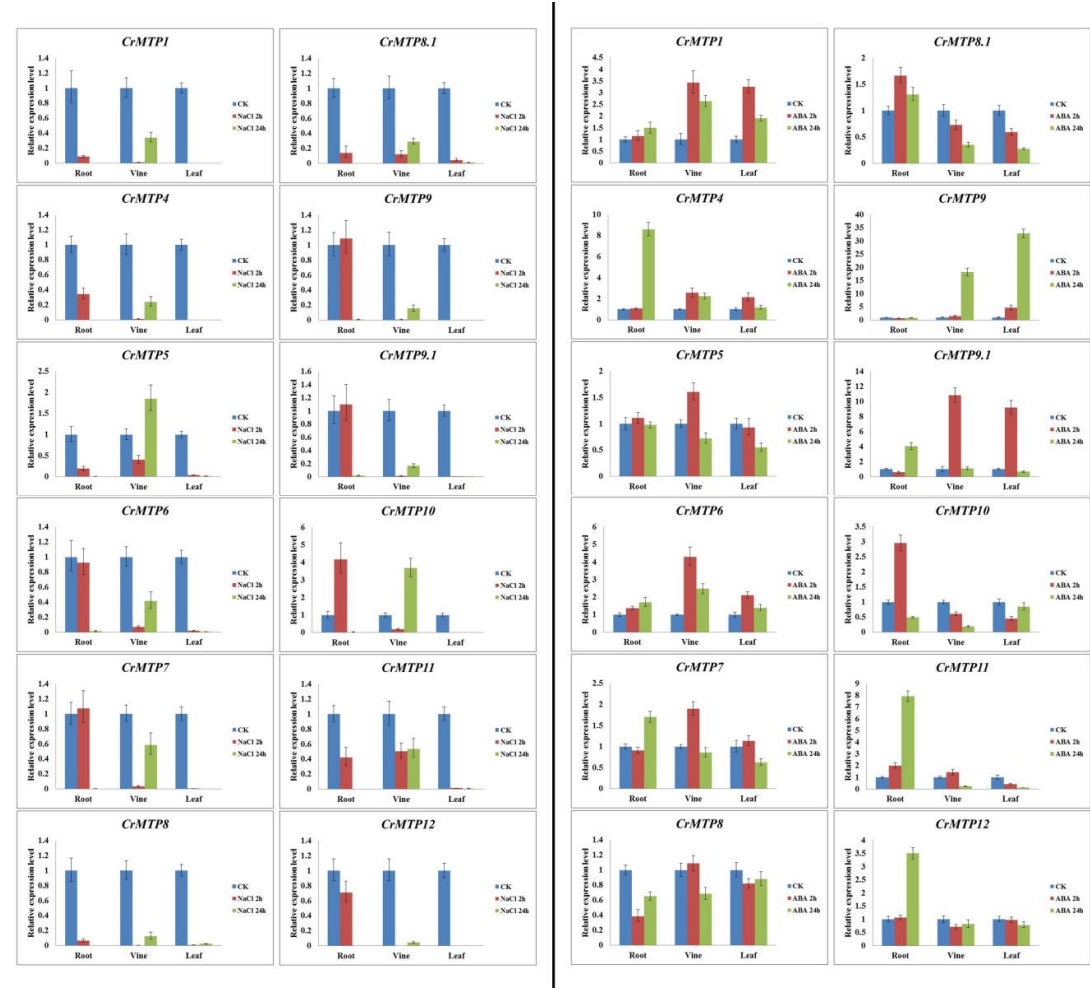

**Figure S3.** Quantitative RT-PCR detection of the expression levels of *CrMTPs* responding to different stresses (600 mM NaCl and 100 mM ABA) in *C. rosea* seedling plants. Relative expression values were calculated using the 2- $\Delta$ Ct method with housekeeping gene *CrEF- $\alpha$*  as reference gene.

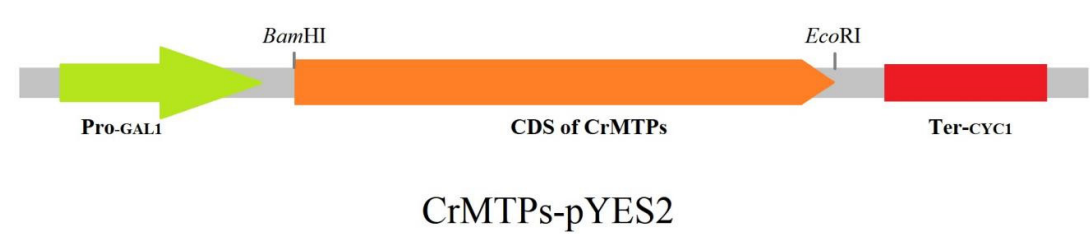

**Figure S4.** Simple map of *CrMTPs*-pYES2.

**Table S1.** The sequences of *CrMTP* genomic DNA, CDS, and promoter region DNA.

| The sequence information of the <i>CrMTP</i> family |                                                                           |
|-----------------------------------------------------|---------------------------------------------------------------------------|
| Protein ( N-terminal to C-terminal)                 |                                                                           |
| CrMTP1                                              | MVFLQLKMLHFHDLQLQEAQSSQDTQVIEISRDFPNVGRKVCGEAPCGFADAGSISKDSEERSTSMRKLMLAV |
|                                                     | VLCVIFMTIEVIGGIKANSLAILTDAHLLSDVAFAISLFLWAAGWEATPRQSYGFFRIEILGALVSIQLI    |



|                        |                                                                                                                                                                                                                                                                                                                                                                                                                                                                                                                                                                                                                                                                                                                                                                                                                                                                                                                                                                                           |
|------------------------|-------------------------------------------------------------------------------------------------------------------------------------------------------------------------------------------------------------------------------------------------------------------------------------------------------------------------------------------------------------------------------------------------------------------------------------------------------------------------------------------------------------------------------------------------------------------------------------------------------------------------------------------------------------------------------------------------------------------------------------------------------------------------------------------------------------------------------------------------------------------------------------------------------------------------------------------------------------------------------------------|
| CrMTP9                 | <p>MVMSAGTSGHGGAAIAETGRREQLLVENSTGDTSSFSWRLNLKEFQLPQQTHNNHNDRRHHHPLSFTFHGLLRK</p> <p>PKKQRKVAEYKKQERLLEGYNMDMTMTETGYFPGSLTEDETKQLAKSERLAINVSNAANLVLFAAKVYASIE</p> <p>SKSLAVIASTLDSLLDLLSGFILWFTANAMRNPNNHYHYPIGKKRMQPVGII VFASVMATLGLQILIESGRQLI</p> <p>SKSKPEMDLDELKWMIGIMVSVTVVKFILMVYCRRFKNEIIRAYAQDHFDFVITNSVGLAAAVLAVKCSWWID</p> <p>PIGAI IIAVYTINTWAKTVIENVWSLIGRTAPPDFLGKLTLYLIWNHHEEVRHIDTVRAYTFGAHYFVEVDIVL</p> <p>PEDMPLNQAHNIGETLQEKLEQLPQVERAFVHIDFEFTHRPEHKMMV</p> <p>MAESGGGPRRREPLLVSPEEEAANPSWRLNVKEFRLPTQTNDQQHHHSFTFRGLLRKPRKQRKVAEYKKQER</p> <p>LLLEGFSEMETMTETGDFPGSLTEDEMKQLAKSERMAVHVSNCNLVLF AAKVYASIASRSLAVIASTMDSLLD</p>                                                                                                                                                                                                                                                                                                                                         |
| CrMTP9.1               | <p>LLSGFILWFTAHAMKTPNNHYNYPIGKKRMQPVGII VFASVMATLGLQILIESARELISKSKPMDMPVKLHWMI</p> <p>GIMVFTVVKFVLMICYRRFKNEIVRAYA QDHFDFVITNSVGLAAAVLAVKFYWWIDPTGAI IIALYTINTWA</p> <p>KTVIENVWSLIGRTAPPDFLAKLTLYLIWNHHEQIKHIDTVRAYTFGAHYFVEVDIVLPEDMLLHQAHNIGETL</p> <p>QEKLEQLPEVERAFVHIDFEFTHRPEHKTMV</p>                                                                                                                                                                                                                                                                                                                                                                                                                                                                                                                                                                                                                                                                                             |
| CrMTP10                | <p>MGTELRDSSDYRTELLSPTIAENVSMARQPSWRINMDEHRLPERQMESHFGFGFLRTLKRQRKLAQYYKR</p> <p>QEGLLKGYQEVD SYHDLGMLPGNLTEDEMKELERNEKVAIYASNIGNMVLFAKVYASIQSRSLAVIASTLDS</p> <p>LLDLLSGFILWFTAYAMSKPNHYQYPIGKNRMQPVGIVVFASVMATLGLQILFESAREIITKAQPERDPVKEK</p> <p>WMIGIMVTATLVKVVLMTYCRRFKNEIVRAYA QDHFDFVITNSIGLATAVLAIKFYWWLDPVGAILIALYTIS</p> <p>NWAKTMENVWSLIGKTAPPEYLAKLTLYLCWNHHEIKHIDTVRAYTFGSNYFVEVDIVVSEEMSLNEAHDIG</p> <p>ETLQDKLEKLPEIERAFVHIDLNTTHKLEHKS</p>                                                                                                                                                                                                                                                                                                                                                                                                                                                                                                                                 |
| CrMTP11                | <p>MLEPVELRSEEQRSLLLDSNNGDRSWRLNFDGFQISSEHTEKQVKPPRGLHDCYGLGQEDNIAEYYQQQVEV</p> <p>LEGFNEMDVL AERG FVPGMSKEERDKLARNETFAIRLSNVANMVLFAAKVYASVRSGSLAI IASTLDSLLDLL</p> <p>SGFILWFTAFSMQTPNPYQYPIGKKRMQPLGILVFASVMATLGLQI ILESIRTLISSDNAFSLTREQE QWVVG</p> <p>IMLSVTLVKFLLMICYRSFTNEI I KAYA QDHFDFVITNVIGLIAALLANYFDDWMDPVGAI IALYTIRTWSM</p> <p>TVLENVNSLVGRSAAPEYLQKLTLYLCWNHHAIRHIDTVRAYTFGSHYFVEVDIVLPADMPLQE AHDIGESLQ</p> <p>EKLELLPEIERAFVHLDYEF SHKPEHAQAHS</p>                                                                                                                                                                                                                                                                                                                                                                                                                                                                                                                      |
| CrMTP12                | <p>MADQPHHHHRPHRLSVPPRTATLATTPRYPYPTVRYSTSASTPTATPSKHRLSSSLSFNSKSKSKSSLSL</p> <p>FLLLFSLRSLYSLPFLRSSPSFSLFPFTFLVSLLSFFLTLSFSLFSSSSSSKDPFQQHKPKQSLLTVTHSQQ</p> <p>RILVAKSIVLALVFLLRFAQALRYCGTASMILAE LMG SIAAPKSKQNRTKVRGFVSLFLGLFMLSFGWDRIECF</p> <p>PVWGYAKCVRVWPLLLPFMSGFLACYERVSIMNWGTIKQLGHKRVRLITLFFTTIVLFVPAVISFFVLESEED</p> <p>SVSFGNLVWPLANTVVFGLLSENYSDDYVMSFKDSKREFLVTFVCTMVLELFYYPELSLWGLLLCGILLYFA</p> <p>VRDLDPFHSNEFGSGEELFSDMIMRPIRHVLGERKSRKIALFLLINTGYMVVEFAVGFMNSNLGLISDACHML</p> <p>FDCAALAIGLYASYISRLPANNHNYNIGRGRFEVLSGYVNAVFLVLV GALIVVESFERILDPQEISTSSLLVVS</p> <p>IGGLVNVVIGLIFFHDEHHHAHGLSGSCSHSHAHTEFHSHSHSHHHDLQCHSKHHHDERHGSNQEFISVSSDC</p> <p>QDNCSGDPGHHNHSSHGRKAEFHADNHCSKSFTHDHAQLHDCHEHC SHERMVECHVDNHSIKSIEHHGHQDH</p> <p>HHGHQDHHHHHGHQDHHHHHGHQDHHHHHGHHDHHAQHHEYHDLHKAPLVHQKHNHRHIDHNMEGIFLHV</p> <p>ADTMGSVG VISTLLIKYKGWLVPACSFISILIVSSVIPLLRNSAEILLQRVPRVHEHELKDVLTDVLKI</p> <p>RGVYGIQKFHLWNFTNTD VVSTLHLHVSTDTDKTSAKSQVLHLLHSAGIKDLTLQVESVG</p> |
| <b>CDS ( 5' to 3')</b> |                                                                                                                                                                                                                                                                                                                                                                                                                                                                                                                                                                                                                                                                                                                                                                                                                                                                                                                                                                                           |
| CrMTP1                 | <p>ATG GTTTTTCTCCA ACTCAAAATGTTGCATTTTCATGATCTATTGCAGATGGAAGCACAAAGCTCTCAGGATA</p> <p>CCCAAGTTATTGAAATCAGCAGAGATTTTCTAATGTAGGAAGGAAGTTTGTGGGAAGCACCTTGTGGGTT</p> <p>TGCAGATGCTGGATCCATCTCTAAGGATTCTGAAGAACGATCTACATCAATGCGAAAGCTTTTAAATGCGAGTG</p> <p>GTCTTATGTGTTATTTTCATGACCATTAAGTAATTTGGTGGCATCAAGGCTAACAGTCTTGCGATATTGACTG</p> <p>ATGCAGCACACTTGCTTTTCAGATGTTGCAGCCTTTGCCATCTCCTTATTTCTTTATGGGCTGCTGGATGGGA</p> <p>AGCTACTCCTCGCCAATCGTATGGATTTTTCAGAATAGAGATCTTGGTGCTTTGGTTTCTATCCAATTAATA</p>                                                                                                                                                                                                                                                                                                                                                                                                                                                                                      |



*CrMTP4*

*CrMTP5*

TGGTTGCTTGCTGGAATTCTGGTATATGAAGCCATTGATAGAATCATTGCCGGTCTAAAAATGTGGATGGCT  
TTTTAATGTTTTAGTTGCTGCATTGTGGTCTTGTGGTTAACATCATCATGGCTTTGTTATTGGGTCATGATCA  
TGGCCATGGACATGGACATGATGGGCATGGGCATGGACACGATGGGCATGGGCATGGACATGGACATGGACAT  
GATGGGCATGGCCACAGTCATGGAATTTTAGTGTCTACTCATCAACATCATGATGCAAAGCATACAAAAGATG  
AGCACCATCACCCCATGATGATCACATACACCATCATGATGAAAAGCATTCAAACATATGCTCATCATCCTCA  
CAAAGAGCTTACTGATCCGCTTCTTGGTGAATCAAAGATGGACGCAAGAAGAAGAAGCAATGGAACATA  
AATGTACAGGGAGCTTATCTACATGTGCTTGGGGACTCCATCCAGAGTGTGGGGTAATGATTGGGGGAGGAC  
TCATATGGTATCATCCTGAATGGCAAATAGTTGATTAAATTTGCACTCTAATATTTTCAGTAATTGTTCTGGG  
GACAACTATCAATATGCTGCGAAACATTTTGAAGTCTGATGGAGAGCACCACGCGAGATAGATGCTACT  
CAGCTTGAAAGGGGGCTATTGGATATGGAAGATGTAGTGGCTGTTTCATGAGCTGCACATATGGGCCATTACGG  
TGGGAAAGATTTTGCTAGCTTGTCTATGTTAAAATCAGACGTGAAGCAGATGCAGACATGGTCCTGGACAAGGT  
TATAGACTATATCAAAGGGTTTATAACATAAGTCATGTAACATATACAGATAGAGCGTAG  
ATGAAGCAAATGGAACATGAGAAAGCCCTATCTTGAAGCAAGGTCCATGCAGGAAATTGAGATACCCATTG  
CCTCTGAAAGACCTGATATTCTTCTCTATGAAAGCGGAGTCATCTGGAATTGTCTTTGTCTTTTTTCAGACA  
GGAAACAGTGATGTGGCATCAAAGAGTCATCAAATCAGCAAAGAACTTCTTGGCTCATTTGTTTCTAT  
GCTATTGTTATGGTTGTGGAATTAATTGGTGGTATAAAATCCACAGCCTAGCTGTTATTAGCGATGCAGCAC  
ACTTGCTTTCTGATATTGCTGGATTGCTATCTCTCTTTGCAGTGTGGGCTTCAGGTTGGGAGGCAACACC  
GCATCAATCTTTTGATACAACCGTCTTGAGGTTTTGGGTGCTCTCTTATCCGTGCAGTTAATTTGGTTGATA  
TCTGGTTTTTTGATATATGAAGCAGTTGGTAGAATTGTTCTCCGAAATGCCAAGGTGAATGGAAAATAATGT  
TTGCAATTGCAGCATTTGGGTTTGTCTAAACGCTATCATGGTTGCGTGGCTTGGTCATGATCATAGTCATCA  
TCATGGCTGTGGAACCTCGAATCATCATCACAGTCATCATCATGGCTGTGGAACCTCGGGTCATACCACAGT  
CATCATCATACAGATCATCATCATGGAATGAGGAACTATCTAAAACAACCTGATGAGGAGAACCTTACCCTGG  
TTTCAAGTAGTCAAAAAATACTAATGTCTTGAACATAAATCTCCAAGGGGCCTATTTACATGTCATGACTGA  
TATGATTCAATCTATTGGAGTGATGATTGCTGGAGCCATAATATGGGCTGAACCGGAGTGGTTTATAGTTGAC  
CTTATATGCACTCTTATATTCTCTGTTTTATCTTTAAGTACTACTATTCCCATGCTTAGGAATATTTATGGCA  
TTCTGATGGAAAGGACACCAAATGAAATCAGTATCAGTATGCTGGAAAATGGCCTCAGAAGTATCAAGGGAGT  
GCAGGATGTTTCATGACTTGCACGTGTGGGCTATAACCGTTGGAAAAGTTGTTCTATCTTGCCATGTAGTGGCT  
GAACCTGGTATCAGCTCCATTGATTACTTGGCACGATTAAGCATTACTGTGAAAAAACATACCAAATACAAC  
ATGTAACAATACAAATTGAGTAA  
ATGGAAGCCAGGGAGACTCCGAGTTCATCAACGGTGATTTTGGGTTTCGGTAATAGCGATCGGAGATTTCGCT  
TTTCGCGCCAAGCTTCATTCCAGCAACAACCTCATAACCGGATTTCATCGATTGCAACGATTTCGGCTCCAG  
AAGGCCATTTCTATCCCGAACAGATTCTGCATAGGCATTCCCTCCGGTGGCCACCACCACCATTAAGTGTCT  
GCGCAAGATGAAAAGCCCTCTGGTTGCTGCAGAGTTCGCTTTTTCTTCTCCTTCGTTTTCTCCGTTTTTCGAA  
ACATTAGGTCTGGCCATAGGTATATGAAGAGTTGTTTTTGATGATCTCGCTCAACGTTGCTTACTCCACCGC  
CGAGTTGCTCATTGGCCTCTTCACTGGCCGTGTGGGTTTGGTGTCTGATGCAGTTCACTTGACTTTTGGATGT  
GGTCTTCTCACGTTTTTCGTTGTTTGTATGGCTGCATCTAGGAAGAAAGCTGATCGAGAGTATACTTATGGAC  
AGCTGTTTTCTTTGTTTATGTCATTCTCCCTTGCAAGTTGAGGCATTTCATGCATTATACAAAGATGAATCGGA  
GCACAAGCATTACTTGATTGTTTCTGCAGTCACCAATTTATTTGTGAATCTCATTGGTGTATGGTTCTTTAGA  
AACTATGCTCGGATTAATCTTGCTTACAGAAATGCAGAAGATATGAATCACCCTCTGTTTTCTGTCATGTTT  
TTGCTGATTCTTTTCGAGGGTTTCTGCTCGGGAAGAGCTGTTGTTTGGGGCTTGTCTGTTACTGTTTTTAT  
GCTTGTCTACCTCTATTTAGGGCAACTGGTGGCGTCTTGTCTCAAATGGCACCTCTTAGCATCCCACTACT  
GCTTTGAACAAATGCTTGAGACAGATTTCTGCTCGGGAAGAGCTACTGGAAGTCTCCAGGCTCGATTTTGGG  
AATTTGTGCTGGACATGTGGTGGGCTCACTATCAATACAGGTAAAGAAGGGGATGGATGATCGCCCAATACT

*CrMTP6*

GGAATTTGTGCATGGCATATACCATGATTGGGTGTGCATGAACTCACTGTGCAGACCGACGATGCATGA  
ATGGGATTTTCGATTGAGAATTCTGAATCCCACATATAGAACATGCATTACAAGGCTTTCCTCTTCAAAATTTG  
TTCCTCCGGTGTGGAACCACTCAATTTGTCTTCATTAGAGTCTTGTTTCAATTCCTCTGAAAATCCCGCGTT  
CAAAATCCCCAAGAGATGGCATTGGGTCAATCCCATCACGACGACTATGATCATCATCACCACCTCCGTCAG  
AATCAGAAGGAGGGAGAGAATATTTCCGGCTCGGACTCGCCGCCGACATTGGTTTGGCCACTGGAAGGCCA  
TCACTGGCTATCTTCCGGAAGCACTGCCATTATCGCTGATGCTGCCCATTCATATCTGATGTGGTTCTTAG  
TGGCATAGCTTTGTTGTCTTTAAAGTTGCCAAGGCGCCAAGAGATAAAGAACACCCATATGGTCGCTTGATT  
TGTATCCACACGCTTCTCCATTTATCTCTTATACATCTAGTCTCTGTGTCATTTATGATTATATTTGTCTGCC  
ATTGTATCTCAGGACATGGTAAATTTGAGACTCTAGGGGCTCTTGAATCTCTTGCATGCTATTGGCGACTGG  
GGGTGGCATTGCGTGGCATGCTGTAGACATTTTGATGGGATTGTCTCCGCTGGTCCAGAAATGGTTAGCCAG  
GCATTGACACATGAGCATGTGCATAGTGACCAACATGGTGGACATCACCATGGAATTGACATGGATCATCCTA  
TCCTTGCTCTGAATATGACTATAGTGTCAATATGTGCTAAAGAAGGACTTTACTGGATAACAAAACGAGCTGG  
TGAGAAGCAAGGTAGTGACTAATGAAAGCAAATGCATGGCATCACCGTGCAGATGCAATTTTCATCACTTGTT  
GCTCTCATTGGAGTTGGTAAGGAACTTTGTTCTTTGAAAGGTTACTTGGATGGGCCTACAATTAAGGAAGTCT  
ACTTTAGAAGGAGAAGGACAAGTATGGACAATTTGAGAAAAAGAGGGGATGAGTTAGTTATGCAGAACTATAA  
CCATAATGACAAGCGGCAGCAACAGATTGGGGTTAAAGGATGCAGGAATCATGGATATGGGGGGAACAAGGTA  
GTGGAGGGGGTGATCATTGTGGGAAAACCTGGGGGGTTGGCTGGAGGGTCTATTCTTGGAGTGAGATTCTAG  
ATCCACTTGCTGGACTTCTTGTCTCAGGCATGATTTTGAAAGCTGGAGCAGAACTGGTTACCAAAGTATCTT  
GGAATTGGTGGATGCTGCAATCCAGCAGCAGCATTTGGATCCTATTAACAACAATAATGCAAGTTGATGGT  
GTCAAGGGCTGTCATCGCTTAAGAGGAAGGAGAGCTGGTTCATATTTGTATCTTGATGTAATATTTGAGGTTG  
ATCCTTTTCCAGTGTTAGTGCTGCACATGACATTGGTGAATATGTTTCGTCATCAAATTCACAAGTCGCATCC  
TACCGTGACTGAAATTTTATACACATAGATCCTGCAATGTCACATGTTTCTCCCGGCACAAACAGATCAGCCA  
GATAGTTGGAGCCGAGACATGGACCAGAACGGTGTGTTCCAGCTGGGGATAGTAACATTGAAGGAATTTGTTT  
CTGATATCATCTCATCAAATTTCCACAGATGTCAGTTGAGCGCATAACACGGCAGATGTTTCAAAGCAAGAT  
TGTTCTTCAAATTGAGGTTTCCATGCCACCTGATATGCCAATTCGACATGCAATGAAATGGCAGAGCAAGCA  
GAAAAAGAGATTTTGAAGGCTGTCTCAAATATAATGCATGTTGGCATTACAGCTACGTTTGGGGCAACCATTC  
CACAGATAAATGATACTTAG

*CrMTP7*

ATGCGAACATCCTATTCCCTACAATCTTCTTCGCTCTCGCCTCCGCCACTCTCACCACCAACACTTGTATTGCG  
TTCTACTTGTCAAACCAGTAGACCACCACCTACCATCTCCCGCCACCACCTCTTCCACTTTCTATTACCCCTT  
CCTCTTCCACGTTCCCTTCAATGCTCATCGCCACTATTTTCATCGCAGTTTCTTTACAAGGGCCAAGCCAGCT  
AAGAAAATTGAATTCACGATCGCCACAGTCAGCGAGCTGTCACAACTGCATTGTGGTGTAACTTCTTGTTT  
TTTCTCTCAAGTTTGGAGTATGGTTAGGTTCCCTCTAGTCATGTCATGTTAGCTGAAGTGGTGCCTCGGTTGC  
TGATTTTGCAAACAGGCACTACTTGATATGGTCTAACTAGCTCAAGGCGTGACCCAGATGCCCTTCATCCA  
TATGGCTATTCCAAGGAAAGATTTGTCTGGTCTTTGATATCTGCTGTTGGGATATTTTGTCTTGGTCTGGTG  
CTACTGTTGTTAATGGAGTTCAAACTTGTGGACTGCACAGCCCCCTGAAAAATATGCAGTATGCAGCTGTGGT  
GATATGTGGTTCATTATCATATTGAAGGTGCCTCTCTTATTGTTGCCATACAAGCTGTCAAGAAAGGTGCAGCC  
GCGGAGGGAATGAAATTAAGAGATTATATTTGGCGTGGCCATGATCCTACATCTGTTGCAGTGATGACAGAGG  
ACGGTGTGTCAGTAACCTGGCCTTGTTATTGCTGGGGCATCATTGGTGTGTGAATGTTACTGGAAATGCCAT  
TTATGATCCCATAGGTTCAATCGTAGTTGGCAACTTGCTTGAATGGTAGCCATATTTCTTATCCAGAGGAAC  
CGACATGCTCTGATTGGTAGAGCTATGGATGACCATGATATGGAGAGGTACTTCAATTTTTGAAAAACGATC  
CGGTGTAGATTCCCTCTACGATTGCAAAAGTGAAGTTATTGGGCCTGGATTCTTCAGATTTAAGGCAGAAAT  
AGATTTTAAATGGAGTGATGGTGGTGCAAAATATCTTAAAGGACTGGACGTGAAGAGTGGGCCAGACAGTTT  
CGTGAAGCTACAAAGGAGAAGGATGATACGGCCTAGTGGAGATTATGTCAAATTATGGTGAGGAAGTAGTTA

|                 |                                                                             |
|-----------------|-----------------------------------------------------------------------------|
| <i>CrMTP8</i>   | TAGCTTTAGGAAGTGAAGTGGATAGGTTAGAGAAGGAGATCCAAAATATCGTACCTGGCATTTCGGCATGTGTA  |
|                 | TATTGAGGCCCACAAATCCAACAGAGGCGACCTTGTCAGTGAAAGTTCTCAATAA                     |
|                 | ATGGGGAAACAGACAATTCCGGTAAAATCGGTGACTTACGCACCTCTCCCCTTTCCAGCAGAAGGTAATGACCG  |
|                 | GTCTCTGGAAGGATCTACCAACAAAGATTACCATAAGATCTCCGAAAATTGGATCAGCGCCACTCTGTTGCT    |
|                 | CAGTCCCCTCGTCGGAGTCTACACGTATGTTCAAACTACCAGGAGAAGGAGAAGTTGGCTCACAGGTCAGAT    |
|                 | TGCAGAGCCAGCATGCGGCATGCAGCATCAGCATGCTTTCCGCGAGTGTCATTGTTAAAGGCCCTACTGG      |
|                 | GGAACCAGAACCAGAATGAGAATCATGATGGAACCTCTTTAACTCGCTTAGAACCGCTTTCTTGTCGAAGCT    |
|                 | TCCCGATAAGCTCCGTTCTGGCCTCGACTCTGAGTCTCCCTTTGAGTTTGATCACCATCTCTCCGCTACCTCC   |
|                 | AGTTTAAGCCAAGGAGAGAAAGAATACTATGGAACAATTTGCTACTCTAAATCATTTGAGGAAGTTGACT      |
|                 | CCATAGTAACGGCTGACTGCACTGATGTAGAAGACATTGAAAAACAAGCTCAACATGAACGAGCAATGAAGAT   |
| <i>CrMTP8.1</i> | TTCTAATTATGCAAATGCAGCTTTATTGGCAATGAAGATTATGTGACAATAAGGAGTGGGTCAATAGCGGTT    |
|                 | GCTGCATCAACATTGGATTCTCTGCTTGATTTTCATGGCTGGTGGCATACTTTGGTTCACTCACATGGCAATGA  |
|                 | AGGATGTAAATATGTACAAATACCCAATTGGAAGTTGAGGGTGCAGCCAGTGGGCATAATTATCTTTGCGGC    |
|                 | CGTCATGGCAACACTTGAGCAACTCAAAGTATTTCATATAAAGGAAAACCCAGTGCCCAAGGCTCCCACCTTG   |
|                 | TGGGGCTTTTCAGGTATTAATCACGGCTCTAGAACAAGTAATAGAAAATAATCCATCTGAGAAGATGTCTTATG  |
|                 | ATCAACTAGTATGGCTGTACTCTATTATGATATTAGCAACAGTGGTGAAGCTTAGTCTCTGGCTTTACTGTAG   |
|                 | AAGCTCAGGAAACAAAATTGTCCGTGCCTATGCAGATGATCACCCTTTGATGTTGTAACAAATGTGGTTGGA    |
|                 | TTAGTTGCGGCTGTTCTTGGTGATCAATTTTACTGGTTGATTGACCCTGTTGGTGCTATTTTGCTAGCAATTT   |
|                 | ACACTATTACAAATTGGTCTGGCACTGTAATGGAGAATGCAGTTTCACTAGTGGGACAATCTGCACCTCCTGA   |
|                 | AGTTCTGCAGAAGTTGACATATCTTGTCTAATGCATTCTCAAATTAAGCGCATTGACACTGTCCGCGCCTAC    |
| <i>CrMTP9</i>   | ACATTTGGCGTTCTATATTTTGTGGAGTTGACATTGAACTGCCAGAGGATTACCTTTAAAAGAAGCACATG     |
|                 | CCATTGGAGAGAGTCTACAGATAAAATTAGAGAACTTCCAGAAGTTGAGCGGGCATTGTTCATCTAGACTT     |
|                 | TGAATGTGATCACAACCAGAGCACTCGGTTCTTAACAATCTGCCAGACACTAAGCCATAA                |
|                 | ATGGACAGGAATTCGGGTTTCGGATCCCACGTGGCCGCTTCTGGCAAAGCTTGACCCGAACCTCCGCCGATAACG |
|                 | GCAGCCGGAGAGCCGACTCAATCGCCGGAACCTCAGTTAACTCGCTCAGAGCAGCCTTCCTGTCCAAGCTTCC   |
|                 | CGAGAAGGTCCGTTCTGGCATTGACTCCGAGGCTCCCTTCGACACTGATCTCTCTTCCACCACCGCTTAAGC    |
|                 | AAAGGGGAGAAAGAATATTATGAAAGACAGTTCGCTACTCTAAAATCATTTGAGGAAGTGAATACATGGTGT    |
|                 | CACCAGACTATGTTGTTGAGGAGGAAGACAATGAGGAACAGGCTCAACAAGAGAGAGCAATGAAGATATCTAA   |
|                 | TTATGCAAATATAGCTTTGTTGATATTAAAGATCTATGCTACGGTTAGGAGTGGGTCAATAGCTATTGCAGCA   |
|                 | TCAACTTTGGATTCTCTGCTTGATCTCATGGCTGGGGGCATACTTTGGTTCACTCACGTTGCAATGAAGAACA   |

*CrMTP9.1*

*CrMTP10*

CCCCAAGAAGCAACGCAAGGTTGCAGAATACTACAAAAACAGGAGAGGCTCCTTGAAGGATATAATGACATGG  
ATACTATGACTGAAACGGGTATTTTCCAGGAAGTCTCACTGAGGATGAAACGAAGCAACTAGCAAAAAGTGA  
GAGGTTGGCAATTAATGTGTCAAATGCGGCTAAGTTGGTGCTATTTGCGGCAAAGGTTTATGCTTCAATTGAA  
AGCAAATCATTGGCGGTCAATTGCTTCAACCTTAGATTCTCTTTTGGATCTGTTGTGAGGGTTCATATTGTGGT  
TCACAGCCAATGCCATGAGAAACCCAAACCATTATCACTATCCCATTGGAAAGAAACGGATGCAACCAGTGGG  
TATCATTGTTTTTGCATCAGTGATGGCAACCTTGGGATTGCAGATTTTGATAGAGCTGGGCGGCAACTGATT  
TCAAAGTCTAAGCCTGAAATGGATCTTGATGAGTTGAAATGGATGATAGGGATTATGGTATCTGTCACTGTAG  
TAAAGTTCAATTCTCATGGTTTATTGTGCAAGGTTTAAAGATGAAATTATCAGAGCCTATGCACAAGATCATT  
TTTTGATGTCTACTAATTCAAGTTGGATTAGCTGCTGCTGCTCCTTGCTGTCAAGTGTCTTGGTGGATTGAT  
CCTATAGGAGCTATTATTATAGCAGTGTATACAATAAATACATGGGCGAAGACAGTGATTGAGAATGTATGGT  
CACTTATTGGAAGGACAGCGCCACCAGATTTTCTAGGAAAGTTGACATATTTGATATGGAATCACCATGAAGA  
GGTTAGGCACATAGACACCGTAAGAGCATACACATTTGGTGCTCATTACTTTGTTGAAGTCGATATAGTGTG  
CCAGAGGACATGCCTCTCAATCAAGCACACAACATTGGTGAGACACTGCAAGAGAAGCTGGAGCAGCTTCCTC  
AAGTTGAAAGAGCCTTTGTGCACATTGATTTTGAATTTACTCACAGGCCTGAGCATAAGATGATGGTATAA  
ATGGCAGAGAGTGGCGGCGGACCCGCGTAGGGAACCGCTTCTGGTGTCGCGGAGGAAGAGGCTGCAAACC  
CTTCGTGGAGACTCAATGTGAAAGAGTTTCGTTTGCCAACCCAACTAATGATCAGCAACATCACCATTCCCTT  
CACTTTCCGTGGCCTTCTTCGCAAACCCAGGAAGCAACGCAAGGTGGCGGAATATTACAAGAAACAAGAGAGA  
CTCCTTGAAGGATTTAGTGAGATGGAGACTATGACTGAAACGGGTGATTTCCAGGAAGTCTCACCAGAGATG  
AAATGAAGCAACTAGCTAAGAGTGAAAGGATGGCTGTTTCATGTGTCAAATGTATGTAACCTGGTGCTGTTTCG  
AGCAAAGGTTTATGCCTCAATTGCGAGCAGATCGTTAGCAGTCATTGCCTCAACTATGGATTCTCTCTTGGAT  
CTCTTGTCAGGGTTCATATTGTGGTTTACTGCCCATGCCATGAAAACCTCAAACCATTATAACTATCCAATTG  
GAAAGAAACGCATGCAGCCAGTGGGTATCATTGTTTTTGCATCTGTGATGGCAACATTGGGGTTGCAGATTTT  
GATTGAGTCTGCCCAGGAACCTTATATCCAAGTCTAAGCCTGATATGGATCCAGTAAAGCTACACTGGATGATT  
GGGATTATGGTATTTGTGACAGTAGTGAAGTTGTTCTTATGATTTACTGTGCAAGATTTAAAAACGAAATCG  
TTAGAGCATATGCACAAGATCACTTCTTTGATGTCTACTAATTCAGTTGGATTAGCTGCTGCTGTGCTTGC  
TGTCAAAGTTCTATTGGTGGATTGATCCAACAGGAGCTATTATTATAGCATTATACACAATCAATACATGGGCT  
AAGACAGTGATTGAGAATGTTTGGTCACTGATTGGAAGGACAGCACCACCTGATTTTCTGGCCAAGTTAACTT  
ACCTTATATGGAACCATCATGAGCAGATTAAGCACATAGATACTGTTAGAGCATACACCTTGGTGACATTA  
CTTTGTGGAAGTTGACATTGTGTTACCAGAAGACATGCTTCTCCACCAAGCACACAACATTGGTGAGACACTC  
CAAGAGAAGCTGGAGCAACTCCAGAAGTTGAAAGGGCTTTTGTGCACATTGATTTTGAGTTCACTCACAGAC  
CAGAGCATAAGACCATGGTATGA  
ATGGGCACTGAACTTAGAACTGATTCTCTGATTACAGGACAGAGCTTCTTTCCCAACAATAGCTGCAGAGA  
ATGTGTCCATGGCAAGGCAACCTTCATGGAGGATCAACATGGATGAACATCGTTTGCCAGAAAGGCAATGGA  
GTCTCATTTTGGCTTTGGATTCTTCCTAAGGACACTAAAGAGACAAAGGAACTTGACAGTATTACAAGAGA  
CAAGAAGGGCTTCTTAAAGGGTATCAAGAAGTGGACTCGTATCATGATCTGGGCATGTTACCAGGAAATTTAA  
CAGAGGATGAGATGAAGGAGCTTGAAAGGAATGAGAAGGTGGCAATTTATGCATCTAACATAGGGAACATGGT  
GCTGTTTGTAGCAAAAGTGTATGCTTCCATTAGAGTAGATCACTGGCTGTAATTGCATCAACTTTGGACTCA  
CTCTTGGATCTCTTGTGAGATTATATACTTTGGTTCACTGCTTATGCTATGAGCAAACCAATCATTATCAAT  
ATCCAATTGGCAAGAACCGGATGCAACCTGTGGGATAGTTGTATTTCGCATCAGTCATGGCAACTCTCGGATT  
ACAAATATTGTTTGAATCAGCCAGGGAAATCATCACAAAGGCTCAACCTGAGAGGGATCCAGTGAAAGAAAAG  
TGGATGATAGGGATAATGGTGACTGCAACTTTGGTAAAAGTAGTGCTAATGACTTATTGTGCGAGGTTCAAGA  
ATGAAATAGTGAGGGCTATGCTCAGGACCATTCTTTGATGTATAACAAATCAATTGGTTTAGCCACTGC  
AGTTCTAGCCATCAAATTTACTGGTGGCTTGATCCTGTTGGGGCCATCCTGATAGCTTTATATACAATCAGT

*CrMTP11*

AACTGGGCAAAAACAGTGATGGAGAATGTATGGTCATTGATTGGTAAACAGCCCCACCAGAGTACCTTGCAA  
AGCTAACATACCTTTGTTGGAACCATCACAAGGAGATCAAGCACATTGATACAGTGAGAGCCTACACATTTGG  
GTCCAATTACTTTGTGGAGGTAGACATTGTGGTTTCAGAAGAAATGTCACCTAATGAAGCACATGACATTGGA  
GAGACACTTCAAGATAAGCTTGAAAACTCCCTGAAATTGAGAGAGCTTTTGTTCACATTGATTTGAATACCA  
CTCATAAGCTGGAGCACAAGTCAAATTAA  
ATGTTGGAGCCGGTGGAGCTTCGTAGCGAGGAGCAGCGCTCGTTGCTTTTAGATTCCAACAATGGTGACCGGT  
CTTGCGGGTTGAACTTCGACGGATTTAGATATCTTCGGAGCACACAGAGAAGCAAGTGAAACCCCTCGTGG  
CCTCCATGACTGCTATGGGGTTCTAGGTCAAGAAGATAATATTGCCGAGTACTATCAGCAGCAGGTTGAAGTG  
CTTGAGGGCTTTAATGAAATGGATGTCTTAGCTGAACGCGGTTTTGTTCTGGAATGTCAAAGGAGGAGCGAG  
ACAAATTGGCGAGAAATGAGACATTTGCCATCAGATTGTCAAACGTAGCAAACATGGTTCTGTTTGCTGCCAA  
AGTTTATGCATCAGTCCGAAGTGGTTCCTAGCCATCATTGCATCCACCTTAGACTCGCTTCTTGACCTCCTT  
TCTGGATTATCCTCTGGTTCACATGCATTTTCCATGCAAACACCAAACCATATCAATACCTATTGGAAAGA  
AACGGATGCAACCATTTGGGAATCCTTGTTTTGCTCTGTCTATGGCAACACTGGGACTGCAAATAATTTTGGAA  
GTCTATCCGCACATTAATATCCTCTGATAATGCATTAGCTTGACCAGGGAGCAAGCAATGGGTTGTGGGT  
ATCATGCTTTCAGTGACTTTGGTGAAATCTTGCTAATGATTTATTGCCGCTCTTTTACAAATGAGATTATTA  
AGGCCTATGCCCAGGATCACTTTTTTGATGTGATAACTAATGTCATTGGCCTTATTGCTGCATTTTGGCAAA  
TTATTTTGATGATTGGATGGATCCTGTTGGTGCTATCATTCTGGCTTTGTACACTATTCGCACATGGTCCATG  
ACAGTGTGGAAGATGTGAATTCAGTGGTTGGAAGATCAGCTGCTCCGGAGTATCTTCAGAACTTACATACT  
TATGCTGGAACACCACAAGGCCATAAGGCACATTGATACTGTTCCGGCATAACACATTTGGGTCTCACTACTT  
TGTTGAGGTTGATATTGTCCTGCCAGCTGATATGCCTTTGCAAGAGGCTCATGATATTGGCGAATCATTGCAA  
GAGAAGCTTGAGCTTTTGCCCGAGATTGAGCGTGCTTTTGTTTCATCTTGATTATGAGTTCAGTCATAAACCTG  
AGCATGCTCAAGCACACTCCTAG

*CrMTP12*

ATGCGCGATCAGCCTCACCACCACCACCATCGACCGCACCAGCTCTCCGTGCCACCGCGCACCAGCACCTTTGG  
CGACCACCCCGAGACCCTATCCACAGTTTCGATACTCAACATCAGCATCAACACCCACTGCAACCCCGTCCAA  
ACACCGTCGTCTTCTTCTCTTTATCCTTCTCTAATTCCAAATCCAAATCCAAATCTTCACTCTCATCGCTT  
TTCTCCTTCTCTTCTCTCTTCGCTCTCTCTATTCTCTCCTTCCCTTCTCTCGCTCTTCCCTTCTTTTCTC  
TATTCCTTTCACCTTTTCTCGTTTCCCTTCTCTCCTTCTTCCCTTACCCTCTCTTTTTCACTATTCTCTTCATC  
TTCTTCTCCAAAGATCCTTTTCAACAGCACAAACCTAAGCAGTCTCTTCTAACGGTCACACACTCTCAGCAG  
AGGATCCTGGTTGCTAAATCAATTGTTCTGGCGCTTGTTTTTCTCCTTCGGTTCGAAGCTCTCCGCTACTGTG  
GCACCGCCTCAATGATCCTTGCCGAGTTGATGGGAAGCATAGCTGCTCAACCTAAAAGTCAGAACCGGACTAA  
GGTTCGTGGGTTTCGTGTCTTGTCTAGGATTGTTTATGTTGTCTTTTGGTTGGGATCGAATGAATGTTTT  
CCCGTTTGGGGATATGCGAAATGTGTGAGGGTTTGGCCCTTGTTGCTTCTTTTATGTCTGGATTCTTGCTT  
GTTATGAACGTGTTTCCATCATGAATTGGGGAACGATTAAGCAGCTTGGTCATAAACGGGTTTCGCTAATTAC  
CCTGTTTTTCACTACTATTGTGCTATTGTTCTCTGTGTGATTAGTTTTTTCGTGCTTGAATCTGAAGAAGAT  
AGTGTTCATTTGGAATTTGGTGTGGCCTCTGGCCAATACTGTGTTTTCGGTGTGCTTTTGAGTGAGAATT  
ACAGCGATGATTATGTGATGAGTTTCAAAGACTCTAAGAGGGAGTTTTTGGTCACTTTTGTCTGCATATGGT  
ATTGGAACTTTTCTATTACCTGAACCTTCCCTTTGGGGTTTGTTGCTTTGTTGGTATATTGCTCTATTTTGCC  
GTTAGAGACTTGGATCCTTTCATTCCAATGAGTTTGGCTCGGAGAGGAATTATTTAGTGACATGATTATGA  
GGCCTATTAGACATGTTTTGGGTGAGAGGAAGTCCCGGAAAATTGCACTGTTTCTTTTGATCAACACTGGCTA  
TATGGTTGTGGAATTCGCTGTTGGATTATGAGCAATAGTCTTGGGCTGATATCTGATGCATGCCACATGTTG  
TTTGATTGTGCTGCTTTGGCCATTGGGCTGTATGCTTCATATATATCCCGTTTGCTGCAAAATACTACTATA  
ACTATGGAAGAGGAAGATTTGAGGTTCTATCAGGATATGTTAATGCTGTTTTTCTGGTCTGTGGGTGCACT  
GATAGTGGTGGAGTCCTTTGAGAGGATATTGGATCCTCAAGAAATATCTACTAGTAGTGTGTTAGTCGCTCTCT

|               |                                                                                                                                                                                                                                                                                                                                                                                                                                                                                                                                                                                                                                                                                                                                                                                                                                                                                                                                                                                                                                                                                                                                                                                                                                                                                                                                                                                                                                                                                                                                                                                                                                                                                                                                                                                                                                                                                                                                                                                                                                                                                                                                                                                                                                                                                                                                                                                                                                                                                    |
|---------------|------------------------------------------------------------------------------------------------------------------------------------------------------------------------------------------------------------------------------------------------------------------------------------------------------------------------------------------------------------------------------------------------------------------------------------------------------------------------------------------------------------------------------------------------------------------------------------------------------------------------------------------------------------------------------------------------------------------------------------------------------------------------------------------------------------------------------------------------------------------------------------------------------------------------------------------------------------------------------------------------------------------------------------------------------------------------------------------------------------------------------------------------------------------------------------------------------------------------------------------------------------------------------------------------------------------------------------------------------------------------------------------------------------------------------------------------------------------------------------------------------------------------------------------------------------------------------------------------------------------------------------------------------------------------------------------------------------------------------------------------------------------------------------------------------------------------------------------------------------------------------------------------------------------------------------------------------------------------------------------------------------------------------------------------------------------------------------------------------------------------------------------------------------------------------------------------------------------------------------------------------------------------------------------------------------------------------------------------------------------------------------------------------------------------------------------------------------------------------------|
|               | <p>           ATAGGAGGGCTTGTGTCAATGTCATTGGCTTGATATTCTTTCACGATGAGCATCATCATGCCCATGGATTGT<br/>           CTGGATCATGCTCACATTCTCACGCACACACAGAGTTCCATAGTCACCACTCCCACCATCATCATGATCTGCA<br/>           ATGCCACAGTAAACATCATCATGATGAAAGACATGGAAGCAATCAAGAATTTATTTCTGTTTCCAGTGATTGC<br/>           CAAGATAATTTCATGCTCTGGTGATCCTGGTCATCACAACCACTCTAGTCATGGGAGGAAAGCTGAGTTTCATG<br/>           CAGACAATCACTGCAGTAAGAGTTTTACGCATGATCATGCCAGCTGCATGATTGTCATGAACACTGCAGTCA<br/>           TGAGAGGATGGTTGAGTGTCATGTAGACAATCACAGCATTAAAGAGCATTGAACATCATGGCCATCAGGACCAT<br/>           CATCATGGCCATCAGGACCATCATCACCATCATGGCCATCAAGACCATCATCACCATCATGGCCATCAGGACC<br/>           ATCATCACCATCATGGCCATCATGACCACCATGATCATGCCAGCATCATGAATATCATGATCTTCACAAAGC<br/>           TCCACTTGTTCACCAAAAGCACAACCATCGCCATATCGATCACAATATGGAAGGGATATTCTTGCATGTTCTT<br/>           GCTGACACGATGGGAGTGTTGGTGTGTATATCTACACTATTAATTAAGTACAAGGGATGGCTTGTGTGCTG<br/>           ATCCTGCCTGCTCAATTTTTATTTCAATTTTAATTGTATCCTCCGTGATACCTTTACTCAGAAATTCAGCCGA<br/>           AATTTTGCTCCAAAGAGTTCCAAGGGTGCATGAGCATGAGCTGAAAGATGTCTTAACTGATGTTTTGAAGATA<br/>           AGAGGCGTTTATGGTATTCAAAAGTTTCATTTATGGAACCTCACAAACACAGATGTGGTTAGTACACTGCATC<br/>           TTCATGTGTCAACAGATACTGACAAGACATCCGCGAAGTCCCAGGTTTTGCATCTGTTACATAGTGTGGAAT<br/>           CAAGGATTTAACCTTGCAAGTGGAATCTGTTGGATAA         </p>                                                                                                                                                                                                                                                                                                                                                                                                                                                                                                                                                                                                                                                                                                                                                                                                                                                                                                                                                                                                                                                                                                                         |
|               | <p><b>Genomic DNA ( 5' to 3')</b></p>                                                                                                                                                                                                                                                                                                                                                                                                                                                                                                                                                                                                                                                                                                                                                                                                                                                                                                                                                                                                                                                                                                                                                                                                                                                                                                                                                                                                                                                                                                                                                                                                                                                                                                                                                                                                                                                                                                                                                                                                                                                                                                                                                                                                                                                                                                                                                                                                                                              |
| <i>CrMTP1</i> | <p>           ATGGTTTTTCTCCAACCTCAAAATGTTGCATTTTCATGATCTATTGCAGATGGAAGCACAAGCTCTCAGGATA<br/>           CCCAAGTTATTGAAATCAGCAGAGATTTTCCTAATGTAGGAAGGAAGGTTTGTGGGAAGCACCTTGTGGGTT<br/>           TGCAGATGCTGGATCCATCTCTAAGGATTCTGAAGAACGATCTACATCAATGCGAAAGCTTTTAAATGGCAGTG<br/>           GTCCTATGTGTTATTTTCATGACCATTGAAGTAATTGGTGGCATCAAGGCTAACAGTCTTGCGATATTGACTG<br/>           ATGCAGCACACTTGCTTTCAGATGTTGCAGCCTTTGCCATCTCCTTATTTTCTTTATGGGCTGCTGGATGGGA<br/>           AGCTACTCCTCGCCAATCGTATGGATTTTTCAGAATAGAGATTCTTGGTGCCTTGGTTTCTATCCAATTAATA<br/>           TGGTTGCTTGCTGGAATTTCTGGTATATGAAGCCATTGATAGAATCATTGCCGGTCTCAAAAATGTGGATGGCT<br/>           TTTTAAATGTTTTAGTTGCTGCATTTGGTCTTGTGGTTAACATCATCATGGCTTTGTTATGGGTCATGATCA<br/>           TGGCCATGGACATGGACATGATGGGCATGGGCATGGACACGATGGGCATGGGCATGGACATGGACATGGACAT<br/>           GATGGGCATGGCCACAGTCATGGAATTTTAGTGCTCTACTCATCAACATCATGATGCAAAAGCATACAAAAGATG<br/>           AGCACCATCACACCCATGATGATCACATACACCATCATGATGAAAAGCATTCAAACATGCTCATCATCCTCA<br/>           CAAAGAGCTTACTGATCCGCTTCTTGGTGAATCAAAAGATGGACGCAAGAAGAAGAAGCAATGGAACATA<br/>           AATGTACAGGGAGCTTATCTACATGTGCTTGGGGACTCCATCCAGAGTGTGGGGTAATGATTGGGGGAGGAC<br/>           TCATATGGTATCATCCTGAATGGCAAATAGTTGATTTAATTGCACTCTAATATTTTCAGTAATTGTTCTGGG<br/>           GACAACTATCAATATGCTGCGAAACATTTTGAAGTCCTGATGGAGAGCACCCACGCGAGATAGATGCTACT<br/>           CAGCTTGAAAGGGGGCTATTGGATATGGAAGATGTAGTGGCTGTTTCATGAGCTGCACATATGGGCCATTACGG<br/>           TGGGAAAGATTTTGCTAGCTTGTCATGTTAAAATCAGACGTGAAGCAGATGCAGACATGGTCCTGGACAAGGT<br/>           TATAGACTATATCAAAAGGGTTTATAACATAAGTCATGTAACATACAGATAGAGCGCTAG<br/>           ATGAAGCAAATGGAACATGAGAAAGCCCTATCTTGAAGCAAGGTCCATGCAGGAAATTGAGATACCCATTG<br/>           CCTCTGAAAGACCTGATATTCTTCTCTATGAAAGCGGAGTCATCTGGAAATTGTCTTTGTCTTTTTCCAGACA<br/>           GGAAACAGTGATGTGGCATCAAAAGAGTCATCAAAATCAGCAAAGAACTTTCTTGGCTCATGTTTTCTAT<br/>           GCTATTGTTATGGTTGTGGAATTTATGGTGGTATAAAAATCCACAGCCTAGCTGTTATTAGCGATGCAGCAC<br/>           ACTTGCTTTCTGATATTGCTGGATTGCTATCTCTCTCTTTCAGTGTGGGCTTCAGGTTGGGAGGCAACACC<br/>           GCATCAATCTTTTGATACAAACCGTCTTGAGGTTTTGGGTGCTCTCTTATCCGTGCAGTTAATTTGGTTGATA<br/>           TCTGGTTTTTTGATATATGAAGCAGTTGGTAGAATTGTTCTCCGAAATGCCAAGGTGAATGGAAAACATAATGT<br/>           TTGCAATTGCAGCATTGGGTTTTGTTCTAAACGCTATCATGGTTGCGTGGCTTGGTCATGATCATAGTCATCA<br/>           TCATGGCTGTGGAACTCGAATCATCATCACAGTCATCATCATGGCTGTGGAACTCGGGTCATCACACAGT         </p> |
| <i>CrMTP4</i> |                                                                                                                                                                                                                                                                                                                                                                                                                                                                                                                                                                                                                                                                                                                                                                                                                                                                                                                                                                                                                                                                                                                                                                                                                                                                                                                                                                                                                                                                                                                                                                                                                                                                                                                                                                                                                                                                                                                                                                                                                                                                                                                                                                                                                                                                                                                                                                                                                                                                                    |

*CrMTP5*

CATCATCATACAGATCATCATCATGAAATGAGGAACATCTAAAACAACTGATGAGGAGAACCTTACCCTGG  
TTTCAAGTAGTCAAAAAATACTAATGTCTTGAACATAAATCTCCAAGGGGCTATTTACATGTCATGACTGA  
TATGATTCAATCTATTGGAGTGATGATTGCTGGAGCCATAATATGGGCTGAACCGGAGTGGTTTATAGTTGAC  
CTTATATGCACTCTTATATTCTCTGTTTTATCTTTAAGTACTACTATTTCCCATGCTTAGGAATATTTATGGCA  
TTCTGATGGAAAGGACACCAATGAAATCAGTATCAGTATGCTGGAAATGGCCTCAGAAGTATCAAGGGAGT  
GCAGGATGTTTCATGACTTGACAGTGTGGGCTATAACCGTTGGAAAAGTTGTTCTATCTTGCCATGTAGTGGCT  
GAACCTGGTATCAGCTCCATTGATTTACTTGGCACGATTAAGCATTACTGTGAAAAACATACCAATACAAC  
ATGTAACAATACAAATTGAGTAA  
ATGGAAGCCAGGGAGACTCCGAGTTCATCAACGGTGATTTTGGGTTTCGGTAATAGCGATCGGAGATTCGCGT  
TTTCGCGCCAAGCTTCATTCCAGCAACAACCTCATACGCCGATTTCATCGATTTCGAACGATTCGGCTTCCAG  
AAGGCCATTTCTATCCCGAACAGATTCTGCATAGGCATTCCCTCCGGTGGCCACCACCACCATTACTGGTCT  
GCGCAAGATGAAAAGCCCTCTGCTTTGCTGCAGAGTTCGCTTTTTCTTCCTTCGTTTTCTCCGTTTTTCGAA  
ACATTAGGTCTGGCCATAGGTATATGAAGAGTTGTTTTTGATGATCTCGCTCAACGTTGCTTACTCCACCGC  
CGAGTTGCTCATTGGCCTCTTCACTGGCCGTGTGGGTAAGATTCATCGTTGAATTTTTATGATAACGTTGAAA  
ACCTCTATTATGTGCACATTAAGTCTGTTTCATTTGTTTTTAGCCTTTAATTTTACAGGTTTATGTACATG  
TGGTGGAACTAATTTTACTTTTGAAAATTGTTTACTTAGGATGATTTCATCTTTAGAAAAATCGATTGGGT  
GAAACCACTCTGTCAACTCAATTTCGATTGAAATCCCTGCTGGTTTCTCATTATTACTTTGCCCTTTTCAGGT  
TTGGTGTCTGATGCAGTTCACCTTGACTTTTGGATGTGGTCTTCTCACGTTTTCGTTGTTTGTATGGCTGCAT  
CTAGGAAGAAAGCTGATCGAGAGTATACTTATGGGTGAGATTCTTTTTTGGCTACTTGTTAACAATGTGCA  
TTGTCGTACCTACTTAATTGCATGACACATGTTTATATTGTAACGAATTTGACGTGTTAAGTATATTGGAGA  
CTTGGTTGCTTGGAATCTTTATCTGGAAATGACCGTATAATTGTCATCATTATTATTATAATTTATTACAATT  
ATATCATATCAAATTGTAGATTTGATAAGGTATGTCTGAATATGCATGGCAAAGTTCTACATTCTTTAGAAAA  
CACTATTATTTTTCCCACTTGCTAAAGGTCTCGTGTTAGTCTTTACTACGTGCATTGCTAAATTTTGTTAG  
CAGAAGAACCTTGCTTTGGTTTGTGCTCTTTTTTGACTTTTTTGTCATGAAATATTCTCCAATGTTTTATCT  
CGAGAGCTAGTTGTCAATTCTTACATAAGATTAAGGGTGGAAATTCGGAACCTTCTGTTAAACAAGAAAAAGATG  
AATTTATTGCATGAGCAAGTGGCAAACTAACATCTGTAGGAAGTTTTTCTGCAACCTAGTTGCTTCACTTTG  
TTTACTCGTATTTTAGCCTGAACCAACACACATTATCCACAGGTCCTTGTGTGCCTGCTTGCATCTCATTT  
ACTATTGGAGAATTTTTTTTCCAATGTGTGTTTATCTCGTTGCTTGCGTTTTGTATTCAAGAATTTGAATCTG  
TTCAACAATTACTTAATGCTAGATGCAAGGATGGCTAAACTTGTACATGTTGTACATGTGTGTGATGCTAAGG  
GTATGCTTAGGAGTGGAGTGAAAGGGAAGAGGGGACTAACTTGTCAATTTCTAATTAATATTCTCTAATTTGA  
TGTTTTTTTTAAAAATGGAAGATATAAAATGATAGATTGCGATAAACATAATGTCCATCTTTTGTATTATT  
TTATAAATATTATATAACTCTTAATTTAAAAATAAAAATTTCCCTCCCTTTCCCTTTGTCTCTAAAATATAT  
CTTGAAGGTATTTTTTTGAACAACCTTTCTACTTTTTGACAATCATTGCAACCTGTTTATGGTTTTAACTAAT  
TTGCTTTAATTTAGGTATAAAAGGCTAGAGTCTTGTCTGCATTTACAAATGCCGTAAGAATTTACATTTCT  
CTTCACTACTGCTATTGTTGTTACCTTGATCATAGCAAATGGTTGCCTGGTGTGTTTTACTAGAACGATGCT  
TTTATAATTGAACATAAATCATGTAAAAGTCAATATCCTTTTACCTTCTAAAATGGCATGTGCATCTCTTAA  
AATCTCAGGTATCCTTGTTCAAGGATTTATCTCTAAAATGCAGAATAGTATTGCATATTAATATGGCGTAAG  
ATTTTCAGAGTTGACATGTATAACTGAATTAAGTTGCTGAAAGCTATCTTTTTTACTTTGGTAATGCAGTTTA  
TTAAAGAAGCAATGATAAATGACATTCTGGTTTTTAATTTTATAGTGTGTTGTTGTGCTTTTAAAGGTCACCTG  
TATGGGATTAAAGAATTTACATGACATGTTCAATTTATTTTTTTTGGAAAAATGAGTGTTCAGTGAAC  
GTCCGGCAAACCTATTTCAATCTTTTTCTCCTGTTTACATTACATTACTTCATATGCTCTAACACGTTGA  
ATTTCTTTTTCTGCTGCTTGTGTAGACAGTGTCTTTTTGTTTTATGTCATTCTCCCTTGCAAGTTGAGGCAC  
TTCATGCATTATACAAGATGAATCGGAGCACAAGTAAGTTGTACTACAATGATTATCAGTATTTTATTAC

TTCTTAAATATTTGTCATATTCAGCAACAAATAAACGGCCTAGTGTTTTTTTATAATAAGAATTGAAATTCCTT  
GCAAGTCCTTAATGTCCTTATTTTTGTGGTTGAGTTGAATCAATTTTCATGCATGCCAGGGTAGCTACTATAGGTG  
TGTTTAGTGTTATGTTGCTGTCTAAATCAAGCATGAATCACTATAGCACTATTTGAACCCTTTGATATTAGAT  
CAAGATCAACCTTAAATTATAATTGTCATTTTTGTTTTTGAAAAATCATGTGTGGAACAAGTCAGCTATGTTTT  
GCCTCTTTGCTTTCTTTACCCATATGTTTTGGATATAATTGTTGATGTCATCCCTTGTTCCATTCCTTTCTCT  
GCATTCTTATTTTTCGGTGGAGGGTGGTTTGTGAGGATTTATCATGGTTGACATTGTAATTTATCTACTTTAC  
TATCATCAGATTGTTTGTTAATCCTTGTATGATTGCTGACCTCTTCAATTTGTATGTTTATGGTTCAAACTAC  
AAGTTATTATTGATAAATAAAGGATAGAAGAATCCATCTATGTTAGGTCAGTGATGGTATATTTTTGCTGTG  
TAATAGTCTATAACTATGTTGATGCAGGATAGCACAAAGCAGAGGATATCACAATTAGGGTTTTCTTGAGGGA  
ACCAAGGTTATAATTTAGGGGAATTGATAACTTGGGATTTGTGGAGACATGACTTGTTCGTGCATTATGAG  
GGTTGTTGATAAACTTAAGAAAGCTAATGATAGAAGTATGAGGATTAATATGAGGAGCAACTTAAAGAGGCA  
TACTTAAGGTTCCCTTGGCACTGTATCCAAGAGAAAGAGATGCATTACTGGCTTGC GGCTAGGGTCTTGAAAA  
ATTTTCTTCAATCAATGTCCTTCTTAGTGGTTTACAATGTCACCTTATGTAGGACTAATCAAACCTTACCAA  
TAGTTACCTTCGCCACTTAAGACCCAAGTGAAATAACCTTTCCTCTAATAAACCTAAATAATGCTTAAATAA  
TAATAATAATAATAAATTCAGAGAAGCCACAAAATAATGCTTACAAAACAAAACCAAATCTTTCTTTG  
GGACATTACTGTAAATGGCTAAATTTACGATCAGTGACATGTAGATCCTGTGGATTTTCAAATTACGATTT  
CTAGGTTTTAATGCTGCCTTCATCTCATATATGTAAATTTGTTTCTTTCAGTGTGGGGAGGGGTTATTTGT  
CTCAATTGTGAGTGTTTTTCATTCTAATAATTTGATTCTTGATTGTTTTCTTGCTAGTTTTTATTTCTGCT  
GAGTGCTGACTGTGTTCTTCGTGTAGGCATTACTTGATTGTTTCTGCAGTCACCAATTTATTTGTGAATCTCA  
TTGGTGATGGTTCTTTAGAAACTATGCTCGGATTAATCTTGGTTAGTATTTTTCTTGAGAGGTTTTTAGATTC  
ACTTGATTTAACCTCTTCAACATTTTGAATGGGACACTCATGCATTGATAGTTCCTTTTGAGCCTTGATCTGT  
GATAATTGTTTCATTGTTCCTTTTGGAATTTATCTTGACGCTTACAGAAATGCAGAAGATATGAATCACCACCT  
TGTTTTCTGTCATGTTCTTGCTGATTCCTTTTCGAGGTAGATATGCTTGGATTTACTTATGTTGTGGTGTGTG  
TGTTATACATTTCCCTTTCTCTTTACATGCTAATATCAACTTAAATATTTCAATGGTTTCTCAGTGCAGGTTT  
GATATTGGCATCCTGGTTATTGTCAATCGGGTAAATACTGTTTCATGTTCTGATAGAGATAGATCTTGAATGC  
TTATGTGATAAGGAATCAGAAACAGGCTTAGACTTACTTGGCCTAAATATTACTGTTTGTGTATTAATTGTG  
CATTTAGGCAGTTCTTTAGGTAATTACGGGTTTGAATTGTTATTTTTGTCTTTGAGCAGTTATTTAGGCAGTT  
ATAGAAGAGTGTGGGAGTTAGTGCCAAAGTCTTTATATATATGGGGTTAGGGGTGGTTATTCATTGGGTAGT  
TATTCATTTTTCTGAATTCAAAAGGAGACTCATTGTTAGGGGAAACCTGGGATTGTCTATGTTCTAGACTA  
AAATTCGACCTAAAAACCAGATTGTTTACTGTAAAAATATGCTGTGTTTAGTCTTAACTTTTTTGTCTGCA  
TAATCATGTCAGAGATGAAAGTAAAAGCTTAAGGGAAAAAATTGACCATTCCCTAATCCAATTTCTTTAGAC  
ATTGTAATTTGGCTTATTTCTTTCTCTTTACAGGGTTCAGAAATGCAGAAGTCTTGTGTTTGGGGCTTGT  
TCTGTTACTGTTTTTATGCTTGTGCTACCTCTATTTAGGGCAACTGGTGGCGTCTTGCTCCAAATGGCACCTC  
CTAGCATCCCACTACTGCTTTGAACAAATGCTTGAGACAGGTTATTACTTTTTCTTGGGTACTTGACCCAAG  
TAGCTTGGGGATACTAATGCCTAGTTTGAAATTTGTCTGGAGCTCTGACACTTTGTGCTGAAGGATTAGCAGT  
ATATTATGCAATGGATTATAAATGACGTAAAAATACTTTTTCTTTCAATTTTTCTTTGTCTCAAATCAGCTA  
AAGGTCCCACTGAATTTATCAAATTTCTTGATAATGCGGATGTTCTACCAATGTTGTATTGAAGCTGTTCTCA  
GATTCATAATTTATGTTTTCTTATGTTGTAAAATGTTGACAAAATATATAATGCACCTTACCTCTGAACACTT  
GCATATATACTTGTTATGAAATTCCTGGTTTATTCAACTAAAGGATGTTTTAACGTCAGCTTTTTTGGCAA  
ATGATATTTTTATCAGATCTATTATTGGGGGTGGGGGTGATAGGTGCATGTTGTTGCTTTAATATATAT  
GATTTAGATTTAGCATTTTTAATTTGACATATCTGTTAATGCGTCAATGCTTCCCTTTTTTAACCATATTATA  
ATTTATTAGATTTCTGCTCGGGAAGACGTACTGGAAGTCTCCAGGCTCGATTTTGGGAATTTGTGCTGGA  
CATGTGGTGGGCTCACTATCAATACAGGTACTTCATTATTTGTTCTGCTTTCCTTTGTGGCTACAGGATTAC



*CrMTP6*

CCGTGGGAGCAAAATCTTAGGATACAATATATGTCTGTGATCTGTACACATGACATCCTTAACAAAAAATGT  
CTAGATACATGCCTCTCACTTGTGGGCAAGCGAGCACCCGTATGAAATGTTGTTTATCTGTTGTAGAGAGA  
CCTGAATTTCAACTTCAAAAATTGATTTAGCATGACTTGTTTCCTTTTCTTTTATTGAGTAGCTAGTTAGT  
TGCAGTGTAGATTGATCCTGACTTTTAGTGAATGATACTGACAGGTAAAGAAGGGGATGGATGATCGCCCAAT  
ACTGGAATTTGTGCATGGCATATACCATGATTTGGGTGTGCATGAACTCACTGTGCAGACCGACGATGCATGA  
ATGGGATTTTCGATTGAGAATTCTGAATCCACATATAGAACATGCATTACAAGGCTTTCCTCTTCAAAATTTG  
TTCCTCCGGTGTGGAACCACTCAATTTGTCTTCATTAGAGTCTTGTTTCAATTCCTCTGAAAATCCCGCGTT  
CAAAATCCCAAGAGATGGCATTGGGTCAATCCCATCACGACGACTATGATCATCATCACCACCTCCGTCAG  
AATCAGAAGGAGGGAGAGAATATTTCCGGCTCGGACTCGCCGCCGACATTGGTTTGGCCACTGGAAGGCCA  
TCACTGGCTATCTTCCGGAAGCACTGCCATTATCGCTGATGCTGCCCATTCATATCTGATGTGGTAACCTT  
CACACTCGCTGCCTCTTCTTTGATTGCTCTCAAAGTGCAACTTGTGTCACTCGTGGATGCAGCTTTCATAGT  
TATTGTTTGTGTGTCAGGTTCTTAGTGGCATAGCTTGTGTGCTTTAAAGTGGCAAGGCGCCAAGAGATAA  
AGAACACCCATATGGTCGCTTGATTGTATCCACACGCTTCTCCATTTATCTCTTATACATCTAGTTCCTGTT  
TATTAGATATTCTGGATGCTAACATTTCACTCATCACTGAGTGTAGGCCAGGAGTTATTTTAAATTAGTTTTG  
GATAGGTTATTTGTTATTTTACATATAATAATAATAATAATAATAATAATAATAATAATAATACAT  
AATGCCATTCTCCCCGTGTTATTTGTTATGATTACTCGTTAGTCTAATGCTTGCCCTTTAGTGTGTTATTTACT  
AAAAGGTCTCTGTGCATTTATGATTATATTTGTCTGCCATTGTATCTCAGGACATGGTAAATTTGAGACTCT  
AGGGGCTCTTGAATCTCTTGCATGCTATTGGCGACTGGGGGTGGCATTGCGTGGCATGCTGTAGACATTTTG  
ATGTTATTGAAATTTAATCTTCAATCTATTTGCTGCTTCACTTATTTCCACGAACAGCATAATTTAAAGAAAT  
TTTGATTGAGCATTTTGTGAGCATATGCATGAAAAGTGATACCTTGTCATCTTTTAAATATTTTGAAGTCATT  
GTTATACACATGCAGGGATTGTCTCCGCTGGTCCAGAAATGGTTAGCCAGGCATTGACACATGAGCATGTGC  
ATAGTGACCAACATGGTGGACATCACCATGGAATTGACATGGATCATCCTATCCTTGCTCTGAATATGACTAT  
AGTGTCATATGTGCTAAAGAAGGGTACTGCCATTACTTAATATTTACATGAACTCTGGCGAGGGGTTCTTAC  
TATTCCTGACGCTATTTTACCTATGCCGTGTCACTATTTTAGATTTGTTGAGTTTGATTAATTGGTCATTGG  
GTGGTATCTGATGTTCCCCCCTCCACTCACCCTAGGTTTACAATACAAATCATTATAGTTTGATTCAAT  
CTCAAGTCAGTAAGACAAGTATAAAAGGACAATCACTAAATTAGGAGACCTATAGAGAACAAAATTTAATTGA  
AAAAATTAATTAAGTTACTTTTGTAGTTATGTTAGCCCAAGCACTTTTGTTCCTAGGGAATGCATTGCCAT  
GGCCTTAACACTTGTGTTTCTCATTTGACAAGGTCTAAATCGAATCTCTTAACCTTTTGGTTGGGCTTGCA  
GCGCCTGAACCTCACAAATTTGAGCTCCTTTCCTTTGTTACAGTCTCTTGTATTGGTCTTTGTTTGGTTAAT  
ATTTTGACCATTTGGTTGTGTTTTATTTTATTTTATGGGCAGGTAGTGTATTGTTTCTTCCCTTGAGTTCAGT  
ATCTATTTTGTGTTTTATTTCTTTTGGGGAGGTAGTGTATTATTTCTTCTTCAGTTCAGTATCTATATTG  
CTTTGTAAATCACTTTGTAGACTTTACTGGATAACAAAACGAGCTGGTGAGAAGCAAGGTAGTGGACTAATGA  
AAGCAAATGCATGGCATCACCCTGCAGATGCAATTTTCATCACTTGTTGCTCTCATTGGAGTTGGTAAGGAACT  
TTGTCTTTGAAAGGTTACTTGGTCTGTATTCTGTATAATGTCTTATAATGCTGTTCTCTATTACAAGTTAT  
GTCATCAATCAGGTTTACTTGGTTACAAGGTATTAACAGGTGTGCTCTTGGGCTATGATTATTGACTAATGAT  
CAATTTTCACATTGTATTAATCTAAATGTTCTAAGTCTTTTCATAACATTATTTTATATTTTATTAATAAA  
GTGGTTATTTGTACATCAATCGCCAATGGTATAATTGATACGAAAAAAGAGTGGCCCCGTGTATGAGGCTC  
CCACATAGTAGTGTCTAGGAGGATAGGTATATGCAACCTTATCCCAATAACTGGACATGTTTTTGGATTGGA  
ACCCATGACCTCCAAGTCACAAGGCAGTAACCTTACCCTTGTGCCTATGGCATATTTGATGTTTGACAATTTT  
ATGTGTTTTGATGTATGGATCCATGAGCTGCTTCTGTTTATTTGTTTATTTGGTACACTATTAATGGATTTGT  
AATATTGTTGTTGTTAGAATAACTTAAATGTATATAACCCCTTAAATTTTGTGTCCTTTTGCAATCGGCACC  
TTGAACTTTTCATTTTCATCTGATTAGTGCTTAAATTCCTTTTATTTGTTACTATAGATCCTTCTGTTCACTGTT  
CGTAGGAGTTTAAGGATTAGTTGAGATACAGCATGAAAGCTCAAGATGTCTATTTGCAGAAGACAAAAGTTT

AAGGTGGTTATATACTCTTTTCCTAATAAAAAACAAAATCCCATCCCTGCTTATTGTTAGTAACTTAACCCATA  
GTTAACAGAAGAATCTTTTTCAGCATTAAATAAGAGTTTAACGATTAATTGGGATGAAGTGAAAGTTCAAGATG  
TCTATTTGGAAAAGGCAAAGTTTTTTTTTTTAGTAGTATGCTCTTCCCTTGTTATTATTGTTATCATAACCT  
AAATTGACATAACTAAAATCATGGTCACTAACCTTATAGTGAATGAAGTCTGGATCTGAGCTCAAGTTTTCTT  
ATGTAGACTTGATGGGTCTCAACAGGATGGGCTACAATTAAGGAAGTCTACTTTAGAAGGAGAAGGACAAGT  
ATGGACAATTTGAGAAAAAGAGGGGATGAGTTAGTTATGCAGAACTATAACCATAATGACAAGCGGCAGCAAC  
AGATTGGGGTTAAAGGATGCAGGAATCATGGATATGGGGGAACAAGGTAGTGGAGGGGGTGATCATTGTGGG  
AAAACCTTGGGGGGTTGGCTGGTGCCATAGGGCAGAGAATTCCTCTTCTCTATTGTTTTCTTTCTTTTGTACT  
AGTTGTTTTCCCAATCCTGCTACACTTTTGTGTAGCCAGAACTTGCTCTCTAGAATCTTTTCAATTAATTCTA  
TATTGCTCCTACCAACACTCATTTGATTAGTTGAATTGACCAGGTACTGCTATTTTGTTTAAACATTAGAACA  
TACTTAAAAGACAAACATATAACAAATACTGTGTTTACAGTCTACCATCCATTGCTGATATTTTCAGTTATTTA  
ATTACTGAATTTGAGTCTTTTTCTAATTTCTACTGTACATTGTCACAGTACTGTCTGTTAACAACACTATCTGG  
TATTGTATAATCCTTTACAATCCAAGACCTTGGGGGACATTTGAGTTTGAGGGATTACATTGATAAAAAATAAT  
TCGTAAGGGAACTGGATATATCTTTCAAGGATTATAAATTGCTTAACCTCTTTTTTGATCTTACATAATGAC  
TGCAGGCTGAAAGACATTAAACCTCTAAATTAATGTACTCTCTGTGTCCACAGGCTTTGTTTCTGGACTCTT  
GAACCATTTATATCTTGTGTCATGCATACATTGACTACATTCATAACCATAAAATCATGTTAGGAGGGTCTAT  
TCTTGGAGTGAGATTTCTAGATCCACTTGCTGGACTTCTGTCTCAGGCATGATTTTGAAAGCTGGAGCAGAA  
ACTGGTTACCAAAGGTACCTTATTCATTGCTATCTGTTTATCCACTATTTATCATTTGCTTGCAACTGGCAAGT  
TTAACTGATTGTTTTATATGTTACTAAAACCTGTTTCCTTTACCCACCCCAATGTATTTCATGTCTAGCACATT  
TTGGAATCTTAAGTTAAACATATAGGAACCTCATATGATCCTCTGATGCAGATAGAACAAAAATATCGAACACA  
CTTATGTTGGATAGATTTGTGCTGGATACCTATAAACTAGATTGTATATATCTCATAAATTGAAAGGTTACATA  
TATCAATATGGAATCTAAATGTAATGAGTCTACTTGTTTTGTTTTTCCTTCAACTTAGAGGGACTTAATATAT  
GTAAACATTCTTGTTTGACAAACAGCATTGTCCGTTTGGATGGATCTTTTAGTGATGCACGCATGACATATG  
TTAATATGTAATTGATGGGTGTTTATTTTCTGCATATTAAATATAATGGCTAATGTTATCATTACTAATT  
TTAGTCAATGAGTTTACTACCACTTTTTCCATGCTTAATGAAATGCCACCTGGCATGTTATTAAGACAACGG  
AGAATACAAATGGTTGCAGAAATGACTCCAATGTGTAACCCAGGGGGTAAACTGATTATTTCTTGCCATAAAT  
CAAGGGGGTTGAAAAACTTTGTCCAACTTCTACCTCTAATTTTTTTGTTGCTTTTGATCAATTATCAGTAT  
CTTGAATTTGGTGGATGCTGCAATCCCAGCACAGCATTTGGATCCTATTAAACAAACAATAATGCAAGTTGAT  
GGTGTCAAGGTGTTCTTTTTTCCAATTTCTTTTTAAAAATATCATTTTTTGCAAAAACCTGGACCTTGCAATTT  
TTCCAATGTCACTCTTTTACTTGGGACAATGTATCAAGTTCTGCTTCAATTTTTTGTCATGCACTTTTAAGTAG  
GTGTTGTTTTGCTGTTTTGCATATGAATATATGATCTTAGATTATATCTTTGCAATTCATTGCTTTATTT  
TATTTTTTCCAATTCCTATACAGGGCTGTCATCGCTTAAGAGGAAGGAGAGCTGGTTCATATTGTATCTTG  
ATGTAAATATTGAGGTAGTTCTGAATTTTATATTCCTTATGTCATAACTCACATGCATTATATGTCAGTTTT  
CAGAATTTACTTGTTAGTTTTATCTTGCAAGTTGATCCTTTTTCCAGTGTTAGTGCTGCACATGACATTGGTG  
AATATGTTGTCATCAAATTCACAAGTCGCATCCTACCGTGAAGTAAATTTTATACACATAGGTTTGTGTG  
TAGTTTTATAAAGCTCTTATCTGGTTAGTGAAATTTTTATACACATAGGTTTGTGTGTAGTTTTATAAAGCT  
CTTATCTGGTTAGTACATAATCTTAGTTTTTTGTTTTTCAACTTTTTTTTTAAAAAAGACTGAAATTGTTAT  
CAACTGAAGTTACTCTGTAGCAAGTTTATCCAATTGTGATTCAAATAGTCAATCACTAAAGTTAATTTTTTAA  
TCATGAATTGTAAATTGTATCAAATAATAAGTTTTAGAGACACAGTGAAAAATAGCTGAATTGTATCATACA  
TGTTAGAAAAATAGAATATAGAAATGGTGGAATATGTAAGCTAGAAACAGTTCCTTAATTGTAGGGATTCAAGT  
CATGGCTCTTAATTTGTAATTATTGTAAAGGTACTATAAATACTACATGTGTGGTTGCTTTAAACACACAAT  
ACATTCAGCAATCACTTCTCTTATAATAAAAGTAATGTTTAGTGTTGATATTATTATTTTAAAGTAGGAAT  
GACAAAAGTACTGAACCATAAGTCTCAAATAACATCATAAGAGTCATGTGTCATATGTCAGATAAAAAACAAC

CrMTP7

GTAATGATATAGCCAAATAAAGTGTGCATAAACTGTGCATGTAACATGTTAAGCCTCTGTTTTGAAAAAAT  
GAAATGAACAATGGAAAAACCAATAAAGAGCATAGAGTGAGGGGGCGACTGTGTCAAGGCATGTTTTGGAAG  
AATGAGAGCTGAGCAATGGAATAATCAAATAGGATGTGTTCCATAGCATTCCCTTCAGTTCCTTTTCATTCAAC  
AATTTAAGCATATTTGACTTTTCAATTTGTTTTATGAGAATTGGTGAAAATTAGAAGAAAAAATCATTG  
GATTGTGCAATTCATATTAGCGATACAGGATGTCACCTATTCATGCATGAACGTCATGATTGAAAACCATTTG  
TGATTCATCACATAATAAGAATCACCGACTTTCTAAATTCTGTCATATCATGAATCATGCTATTCTAACAATT  
ATGCTTTTGTAGTTTTTCGTTTCAGCACATTTTCCTTTCTTACAATGTGCTTGCCTTATGCCACAATCACATC  
TAAGTAATGTGCTTACTTAATATTGTGTCTACGTTGACTAATATACAGATAGATGGCTTTTGTGCCTGCATGA  
GTAAATACTATTCCACAACAATAAACTTTGCAAGAGTTGTATTGTTTTGGCGTTAAATCTACAACGCTA  
TTTGCTTTTCTGGCGCCTAGTTTTTTCCCTATGGAGCATCAAATATAAGTTTTGCATGATACAGTGAAATC  
TGATATGGGATGGACATACCTGACTATTTATGCATTCTAGTATATAACCGAGTCTTCTGAAATTTATTCTGTC  
CATACCAGTAACCTTTTTCTTACTACTTTTGGACCATTACTAATGTAGAGAAAATGATTAACCTTGTTTTGAG  
TGGCAAAAGGAAGATTGACTCTGTCATCACATTGGTCCATCTCTCTTAAGTCGTATTTTCACAGATTAGAGG  
TCTGTGAGGGCAAAGATAATGCCCAATTGTATATTTAGGCAGCCTTTACTATCAAATTGCATCCTTATGACAA  
TTAAATTCACCTTATCCCAATGATATACTGTAATGAGGTTTTCTAAAATCTAAATCATTCTTCATAGTGGATA  
TCATGTAAGCTGCTATTGTGTTCTTTTAACTAACATTTTTTCTTCTTTCTTAATCTCTTGTAGATCCTGTC  
AATGTCACATGTTTCTCCCGGCACAACAGATCAGCCAGATAGTTGGAGCCGAGACATGGACCAGAACGGTGTT  
GTTCCAGCTGGGGATAGTAACATTGAAGGAATTGTTTCTGATATCATCTCATCAAACCTTTCCACAGGTAACAT  
CTTTATTGCAAACCAAAGACAATCAAATAAGCTTCAATTTGGAATTTGATAGGGTCATTCTGTTGGGG  
ATTCTTTGATTTTATTGGTTATAAGTGATCCATGGTAATGGTAGTACAATTGAATTATAAAGTTAGACTAGAA  
CTACTTGTGTTTTCAACCTTTAATTGTCTCTAGCTGGTTTTTCAGATGTCAGTTGAGCGCATAACACGGCACAT  
GTTTCAAAGCAAGATTGTTCTTCAAATTTGAGGTTTCCATGCCACCTGATATGCCAATTCGGTAAGTTTTATTG  
TCTAACCTAGTGAGTTTTTGTGTATTGGGTCAGTCCCTCGTGGCAATTTATGTTTATTTATCCGAGACATGC  
AATGAAAATGGCAGAGCAAGCAGAAAAAGAGATTTTGAAGGCTGTCTCAAATATAATGCATGTTGGCATTGAG  
CTACGTTTGGGGCAACCATTCCACAGATAAATGATACTTAG  
ATGCGAACATCCTATTCCCTACAATCTTCTTCTGCTCTCGCCTCCGCCACTCTCACCACCAACACTTGATTTGCG  
TTCTACTTGTCAAACCAGTAGACCACCACCTACCATCTCCCGCCACCACCTCTTCCACTTTCTATTACCCCTT  
CCTCTTCCACGTTCTTCAATGCTCATCGCCACTCATTTTCATCGCAGTATGTCTCTTCTCTCTTTACTATT  
TTCTCATTCATTTCATTACCTCTTTTCTTCTCTCTTCCGTTCTAGGTTTCTTTACAAGGGCCAAGCCAGCTA  
AGAAAAATTGAATTCAACGATCGCCACAGGTCCTTTTATTTTCCGATTTGCTTTTGCTTAGCATTATCTTTTTC  
TCATATTGCTATGGAAATGCTTCTCTTCCACCATTTCTCTTCGGTCTTTCTTTTGTATTATTTTATTAATGT  
GCGAGGATAATGCTGTGCTAACTTGTTCCGTTACCTGATTCTTCTTGTTCCTCCCTTTTGTCCGTTATTCT  
TAGTCAGCGAGCTGTCAAACTGCATTGTGGTGAACTTTCTTGTTTTTCTCTCAAGTTTGGAGTATGGTTA  
GGTTCCTCTAGTCATGTCATGTTAGCTGAAGTGGTGCCTCGGTTGCTGATTTTGCAAACCAGGTATATGAGT  
TGGTTAGCATTGTACAATACGATTCTTTATGTAAACGAGAACTAATTTGTGCTGCATAACTTATTTTGTAGG  
CACTACTTGCAATATGGTCTAACTAGCTCAAGCGTGCACCAGATGCCCTTCATCCGTAAGTTAAACAATGTTG  
TTGTGTTTGTTCACCCCAGCCTCCAATTTTTCGTTATGTAAGTATTGTTGAGCTGATTTCTGACATTGGATA  
TGAATTCACGTGTTGTATGATTCAAGAACCATTATACATGTAATGGATGAATGCATGGTTAGCTATTGTGTCT  
GATTTCCATGAATTGTGCTTCAATCGCTATTTGTGCAAAATCTAACTAGACTCTATATGATAATAAGTTATGG  
CATCCATTTCTATTTTATGGGATGAACGTAGATGTTGCTTTTGTGTTTACTTGAATTTTGGAACTTAATCACT  
GTGTTAAATGATGTCTTCTATTTCTACAGATATGGCTATTCGAAGGAAAGATTTGTCTGGTCTTTGATATCT  
GCTGTTGGGATATTTTGTCTGGTCTGGTGTACTGTTGTTAATGGAGTTCAAAACCTTGGGACTGCACAGG  
TATTTAACCAAATTGGATCTTTGAAATTAACAGTTAACTTATCTATAATAAATTATGGTCAATTTTCTTA

CrMTP8

TTTCAATTATTTCATCTGTGAATTCTCTTATTCAAGTTATTGACTTTTTAGAGTTTTCTTTTCAGCCCCCTGA  
AAATATGCAGTATGCAGCTGTGGTGATATGTGGTTCATTTCATCATTGAAGGTACTGCTGTCTGCATTTTCAGTC  
TGGTGCAATTTATTCTCCTTTGTCTATTTCAGTCCTTTCTTTTCAATGATCATTATTTGTTAGGTGCCTCT  
CTTATTGTTGCCATACAAGCTGTCAAGAAAGGTGCAGCCGCGGAGGGAATGAAATTAAGAGATTATATTTGGC  
GTGGCCATGATCCTACATCTGTTGCAGTGATGACAGAGGTAGTAACCTGTGCTTACTCATCTTTAGTTCTCTGG  
ACCATGTTACAGTTTATTGGGTTTAAGCAACAATTGTTGATGGATCAAAGGAGAAAAAACTCATTTAGATAT  
AAGTTTTGGATAAAATGAATTATTTATCACGTGTTACATATTTGGCTATATTTTCTCTGGAAACAGTTAATT  
AAAGCTAGTTATTTTTTGGATATTTAACTAATGGAACCTTCAGCTTCTGTGCTCCCTGGGCCATGGTAAAGAA  
AATGTGTTTTTGTGTCATTTTGCATCAGAAAAAGGAACAAGGATGAGTGACCTAAAACTTTTATTGCCGGGA  
GTTTTCTATTTGTCTCTCTAATGGACTATGCAACATAAACTTATTTGTCTATTTAGCTTTTAAACCCCTTTTGC  
AACTGATGAATTAAGATTTTGTCTGGTTGTTTGTCTCATATATGGTAGCTAAATATGCAGGACGGTGCTGCA  
GTAAGTGGCCTTGTTATTGTCTGGGCATCATTGGTTGCTGTGAATGTTACTGGAAATGCCATTTATGATCCCA  
TAGGTTCAATCGTAGTTGGCAACTTGCTTGGAAATGGTAAAGAGGGTTCAGAAGACAGCAAAATAGCATAACAT  
TGACACCTATTTTAATTTAATTTTCATGCTGAACTAACCATGCAGGTAGCCATATTTCTTATCCAGAGGAACCG  
ACATGCTCTGATTGGTAGAGCTATGGATGACCATGATATGGAGAGAGTACTTCAATTTTTGAAAAACGATCCG  
GTACAAGCTTACTAGGTTCTACTGAGATATGATAACTTCTTATCATTTCATTTGACTAAGGTGACTTTTCATGCT  
TTAGGTTGTAGATTCCTCTACGATTGCAAAAGTGAAGTTATTGGGCCTGGATTCTTCAGATTTAAGCAGAA  
ATAGGTTGGTTGCTTTCTCGTTCATTGTTGTTATTTTCTATGTAATATAGGTTGTGGATATAAATCTGGGAT  
TTGCCCTTATTTAGAACATAGGCCATTTTGTGTTGTTTTGTTTTTTTTTAAAAAGTGGAACTTTTTAGTTCA  
AATATATGCTTAAAAAACTCGCTATCTTTTTTTTTTTTGGGAAAAATGATCATGCATGGTCTTGGCAATTATT  
GGCATCAAAGGTCTTTATTTTATCACAATAATCTTCTGATCCTGTTATATGTAAATCCTACATCATTAG  
TTTGCTATAATTTTCATCACCATTTTTTGGTTATTTGAAACACGCTATCCTTCTCAAGTTTCAATTTACATAG  
CTGTAGCCTGTAGCTGCTGTACTACTTCTGTATTCCTAATTTCTTTTTGATATCTATTTTATATCTATTAG  
AATTGGTACTCAGAACCGTAGAACAAGCATATGTTTCGATAAACTTCAATTGGGAAAAAACTTATGATATAG  
CTTTTTTTTAGAAGCTGGTCTTTCTAATTTATGAGAAAAGCATTAAACTGTCTTTGAGGATTTTTTCTTTT  
CCCCTGAAACTTGTCTAATTATCATTTTTCTTTAATGAAAAATTGTTTCATTACTTTTTAAATAAAAAGCACAA  
GCAAACTGACTCAAAATGGAGCTAGAATCTACATAATAAATTCAAATTTTACCATCTACATCCATAAGCATG  
TCAAATTCGGCAATGGTAACAATTAACAGGATGCTGTTAATATGATCATTCTTGATGAAACAGATTTTAAT  
GGAGTGATGGTGGTGCAAAATTATCTTAAAAGGACTGGACGTGAAGAGTGGGCCAGACAGGTGAATACTCTTC  
TTTTATTATTGTTCTGTGAAGACCTCTGATAATGTTTTGTTCTGCTGTTATTATTGGTATTGTTCCACTGCTG  
CTGCTTTTCATGACTTGCTAGCGAAACAGTAATGCCTTGACACCAGCTTAAATATGTGCATTTGTAATTAGA  
CTACATGAAACTATCCTAGGACATTAGTTCACATTTAAATAAATAGTATAATTTGGCTCTTAAGGCATGGCT  
GGGTAGGTTACTTCCCCCTTTTCATGATCATTTCATAATAGTTCGGTTGCCCTGCTTCATGCCATTGTGTGGT  
TTAGAATATTTAGATATGTAACCTTCATAATGACCAAGTTGATTTTGTACCCTTCTGGACTTTTGTATTATTA  
CAGTTTCGTGAAGCTACAAAGGAGAAGGATGATACGGCCCTAGTGGAGATTATGTCAAATTATGGTATGCAGT  
AGTAAACTTGATCCTTATAACCTTGCTGGATGAGAATGGAATACTTACAGTTGTAAGATGTGGCAGGTGAGGA  
AGTAGTTATAGCTTTAGGAAGTGAAGTGATAGGTTAGAGAAGGAGATCCAAAATATCGTACCTGGCATTTCGG  
CATGTTGATATTGAGGCCACAAATCCAACAGAGGCGACCTTGTCAAGTGAAAGTTCTCAATAA  
ATGGGGAAACAGACAATTCGGTAAATCGGTGACTTACGCACCTCTCCCTTTCCAGCAGAAGGTAATGACCG  
GTCTCTGGAAGGATCTACCAACAAAGATTACCATTAAGATCTCCGAAAATTGGATCAGCGCCACTCTGTTGCT  
CAGTCCCTCGTCGGAGTCTACACGTAACCTTCTTTTTTGCCTCAATTTTATTACATGATTATTATGTGGTTG  
TGGTTGTAAATTCGTCAGCTTTTCGGATATGAATGATTAGAATTGATCTCCTTAGGGTTTTTACCAACATCGA  
AGACCTATTTAATTTTGCTAAGCATCTTATTGTTAATTTCTGGAATATGTCCACTCGTGTGTCCTTTTTTTT

GTGTATTCTTTTGTATTCTGATATGAAGTCTGAATCGCTAGGGTAAAGGAAACAGTTTCATTTCAATATACA  
CTAAATTAACATATATGATATGCCCTGATGAACCTTTGATGAACCTTGATGCTTAACTACTTGCCAAGATGCTGTT  
AAGTTTGATGCACCTTTCAATGTATTCTGCGCCTCTTTAGGTGTTAGCAGTGTTTTCTCCATCTAAGAATTT  
TGTTTTACTGTGTGATAGGGAACCTTAGTTCCTTCGCTTTATTCTTCATGGCAAAGTTTCTTATTGAATTGA  
GAATGAGAACTTGCCACTCCTATCTTGAAGATATGAAGTATGCAGTATACTAGGCTTGCTGTCTGAGGACATCA  
TATCTGCTCGTGTTTGTGTCAATGAGAGCATGATGTGCTGGTCTGCTGAATGGCTCTGTAGGATGTATCTG  
CATATTTATGGATGATTGGTTATCTTTGTATGTTTTCTCCCTGTTTTTGGTGGTGCATTTGAGATTACTG  
GCTTTGGTTGTTGCTGAAACCATGGTTGAAGCCAATACCAATTTTACCTGCACCATGCCTCCAAATGTGTGCA  
ATATAAGGTTGTCAAGATTGAGATTCTATCATTCTATGTAGGACTGGAAGGGGAGGGTAACACATGAAATG  
TGAGATTATATCTCAGATTATAATTTCTATCTAGATTGTAAAATTAATCTAGATGTGCACACATACAAATA  
ATGTAATTAAGCAGAATAACCTTAAATTGTAACCTCACATTTAATTAACCTCAAATTATAATCTAATTAAGGTT  
ATAATTCATAAAATAAAAGATATATAAAGTTATTTACATGTAAACTAGAAAGACAGCCAAAGCATCCACCAAA  
CATAGTCAAGAGTTTGTGGGTACTTTCCTAAAGGTCAAAGATTGATTTTTTTTTTTTGTATTTTTGGGTCTTCG  
CCCTTTATGTTATTTGAAAAAAGTTCTGGGATGCTTCAACAGAGTCAAAAGACAGAAAACCAAGCT  
CACTTCAATGAAACATCCAGCCACCCTCAAGTCAATGACTCAGATGCAGGCAGCACCTTGATGAAGTCCCATC  
CCCATGAGCAACACTGCCTGATTGTTTCTGCCTTCCAACTCCATTTGGCCAAAGAAATTATTTTACTTTGTG  
AAATCATGCATGGTACCATGGTTTTATGCATAGGTAATCATGTAAAGTCAGGTTTGGGGAGTAAACAGATAA  
ACTCAATCTTGAACAAAGGGGAACACCAACAGAGTTGTGCGACCGCTGAGAGTCACAGCACCCTTATGCAGT  
GGAACGGTGTCTTAGAGCCTCTAGTGATCAGAGATGTGTGTGTGAGGGGAGGAGAGCCAAAAGAGGGGTGG  
GGTTGGAAAAATGGGTGCTCAGCCCTGCCACTTACATGGTGGCTTGTCAGATTTATGAAAATGCCCCAT  
TTCAGTGATGTACAAAGCTTGCCCTTACAATTTTATAATGTTCTCACCAATTTGAGTCAGTACAAATATTTGGA  
TTGAAGCCTCTGCACGGAAGTAAAGTAAGATTGTGCAATACTTCAAGGAAGATTGCAATCTTTTTTTTAGA  
GTATAGTGGAAGTAATTGGATTTATACGTAGGACCTCATGCAACTATCTGAACTTCCCACCCTAGGCTGAC  
CCTAGTGGGTGGAAGATTGCAATTTGAATTTTGATCAACATTGGTGTATATGTTACTATTAACATATGCCAT  
TGTGCAAAATTTTGTGGTACATCACCTGCAACCTATGAAGAAAAATTCGAGAAAGAAAAATAGAGGTGTGG  
GTGGGAATGAATAGTTTCTTTCATTTTCATCTATTTTAAACAATTCAAACAATTATATTAGAGTAACGTCATT  
CTATTCCTGATTTTCTCTCCTTCTCACTATCCAATATAACCTCAGCAACCATTGTTGTAACCTCTATCTA  
CTAAAGATCAAGGAAAGATGAAAAATTAATTTAACTAGATATTTGATCTGGTATTTTTTTTCTTGAAC  
AAGTATGCTAACTTAGCACTGGTCATTAAGTAAATAGGGGCCGAATTGAAATGAAATTAGCTACACTACAG  
TAATTTCTCTGGAGAGATGGATTTGGAGCAGGACAAATGCTGAATTAATTTATTTATAATATATCTGCCATGA  
ATCTCAAAGTGCATCTCGTGATGAAAAGCTCAACCTCTTGAGTGGTTTCATCTCTCCTTAGAATTGCTCATTAG  
CTAAGTAGCTTTGACTGAAAAGTACTCTCTCTTTACGGGTAGTTAAATTGTATGTCTTTCAATGGATGCAGG  
TATGTTCAAACTACCAGGAGAAGGAGAAGTTGGCTCACAGGTACTGAGCTCATGCAAGAGCTATTGGATAAC  
CTTCAAGCTTGTTGACTTGCTTTTGGTCAGTCAGCCAATATGTGATTATTGAACTCTCTTACCCTTTGGTT  
TTGAGATGTCCGAGTTTGAGACTTTTCAACTTCGACAATGATTATTGATAGAATTTGTGTTGCCAATAATGCC  
AAAATTGGTTTGCCATGAATACCAAAATGAGTTGGCACGTTAAACATCAGGATGATTGAATCACTTTTATCAT  
TTTTTTTTATAATTCGATTCAAACATGCTTTACAAATAATCACTGAATTTTGACTAATTTTATCAGCTGTTT  
ATCTCTGAAAAAATAGCATAACTCTATCAATATGAGCCTTTTCAACGTAATATTTCCCAAATTTTGCTTAT  
AAAATTAATAATTGAATTTCTATTATTGGTTCTTACATCACACCAAGAATTATAATTTGACGACTGATAT  
TGTCAGTAGCCCTTATAAAGTTTCGATCCATATAATTAGGTCCGTAATGAACTTCGTTTGATTGATAGGTTAA  
GCCACTTTATGGATAGGGAGGTGTCAATAAGTTGCGATTATATATAAAAAACGAGTATTGCATTGTCGTTTG  
GATGTTAACCTTTACATCTCTCGAGCAAGGTGATCTGTTAACCTTGCACTACTGTTTCTTTTGGCACAGAGC  
CTGACATACTATAAGTATACATTAGATTTACTATGTTTTATAGGCTGATGTACTCCAGGAATCTACTATCTCA

ATATTCATGCACCGTGCATATTTTCATTGTTTCGTTGGCAGCATGAATTAGTATTTTCATTATTAATTCGGACCA  
TGTTTTACAACCTAATCTGTGGTTGATTGCTCATTGTAAATGGAAATGGTATATATATATATATATATATA  
TATATATATATATATATATAGTTTAGGTACTTCAGACATACTTCAGGTCCTTCTTAGGCCGGTCTTATTAATA  
TTTCTTAAGATTTACGGATAGATAGTGTCTGAAAAATAGATCCAATCAAAATTTAGGGCTGGATGATGATAAG  
ATTACCCGTCTCAATCCGTCCCTCACATTCCCATCATAAGTATACCATTCAATCTTGAAATAGAAATAGCTGG  
TATAACAAGTAAGCTTTTTGAAC TAGCTCATCATGAATCAAGACTTGGACGGGCAAAATATACGTAGTAGGCA  
CATTGGCCACTCAAAAAATTATATGTAATTGATATTTTATTACATTTAAAGAGCTATTTATCCTTTTTAAAT  
TATTACCAAGTGTCTTCTTTTTTGGTCGATAAATGTCTTAATTTTTTAATCTTTTTTATTTTCCAATTTCTTTT  
TGGATTAGACAAGTTATTTTAATCTTTTTTAAAGACACTATTTTTGATTGGTAAATAAAATAAAATTTTATTG  
ATCAAAATATAAATAAAGTCTAAAATCAATATATAAATTATCAAATACATAATAGATAATTTTTTGATTAAATT  
TTATCACAAATCATAAATATAATCTTAATTATAAATCAATAGTTAAAATAATTTTAAAAAAATACAAATACG  
TTTAATAAATATATTTTAAATTAAAGTTTATATGAAGATAGAATAAAAAAGTTAGTATAATATTAATATATTT  
GCACTTCAATTTGGTGTGATTCAATTTTACCATAGAATTTGAAATCCAATCAGGCTGTATAAAGAAATCTA  
ATCTTTTAATATTTCTGTTAATGCTTTTATCTATTTTAACTTTTGTAGTCAGTTAGCTGGTTGAACAAT  
TTAAAGCCTGTTGTTGAACACTCCGGCTTCAATGCATAAAAAATGAGATTTGACTTCTTTAAATAAATAAAT  
ATGCTTGAAAAGATAAAATATTAACGGTTAATATTGTAAAAGCGCACACACACACATATATATATATATAT  
ATATATATATATATATATATATATATATGCATAACAAATTAATTAATATCAATCTAATCCCTATAAGACGAGTGAT  
ATGTTTGTCTTTGTAAAGATGAAAAGCGTCAGATTAGTTGTTTATAGAAATTACATCAATTTAGTGTTTTAA  
ATGAGAAAATATATTGTTATCAATTTAGTCATAGAATAACAATGTTAATGTCCATATTTAATGTTAAAGGATT  
AAATTGAGTCATTTTTCTACTGTATTAATAATTTTAGACCTAATCTTTTGGAACTGAAATCTTGCTTATTTT  
ATAGGTACGGAATCGATTATTATTATACTTTTCCAATTAAAAACATATGTTCTAATGAAATTATATTGTTTCAG  
ATTAATGTAGCAGATATTGTTACATGATCCCTATAGAATCAACCGCAATGAACACAGTATTCTCCTAATTTAT  
GCAAAAATGTGAGTAGGTTTAAATTAACAGGTTTCAGAAAATCTATACGAGGGAATGAAAACCATTTTATATAA  
TGAATATTTTCTTAACCTTTAATTTTTAATAAAATCATGTGTGATGGAGCTTTATCTCTAAAACAAAGTAACT  
GGGAGTTAGTATCTATTGTGGATAACATGCATTTCAATAATATTCAACGATTGAAAATGAATTTTATTCAATT  
ATAAACCACATGGCTCCTCCTAAAACCTACTAAAACAAGTGTATTTTAAACGAGAATCTCAGCACTCTTCTCT  
TCGTCATCCGTTGATAGTTTCAACTGAAGCTAAAAATAGTTGCCATGATGACAAATGACAAGCCCCACCTTCA  
AATTTTAATAGTTTACTAAAACCACTTTTGCAGGTCAGATTGCAGAGCCAGCATGCGGCATGCAGCATCAGCA  
TGCTTTTCCGCGAGTGTCAATTGTTAAAAGGTCAACGACAACTTCCCTATACATTATATTAAATTTGTCTGCAT  
AGTACCAAGAAGCAAGATATGGGTTGGTTCTATGATGACTATGTGATAATGTTAAAGTTACTCCTCTAAACAA  
AATTGAAAGACTGTAAATCAAATGTTCAATTCAACAGCAAAATCCTTGTTAATGTAATTATTATGTTATATA  
TATATATATATATCATTGGTGCATGGTTGACCACTATCAGTAGGTGTAATTGAATGGATGATAATTCAAGTTC  
AAGGCCCTACTGGGGAACCAGAACCAGAATGAGAATCATGATGGAACTCTTTTAACTCGCTTAGAACCGCT  
TTCTTGTCGAAGCTTCCGATAAGCTCCGTTCTGGCCTCGACTCTGAGTCTCCCTTTGAGTTTGATCACCATC  
TCTCCGCTACCTCCAGTTTAAAGCCAAGGTCTCTCTCTCTCTCTCACTAAAAGTTAAAGTTGGAGTAATTAA  
TATATTAAATTAGTTTCTGAAATTATGATTATCAATTAATTTAGTTTTTTAAATTAGAAAAGTATCATTTAGT  
TACTAAAATTACTAAACAGACATTTTTAGTAACTCATTACTAACCAGCTAAAATGGCCTATTTTTTATAATTT  
CATGGGTTGAAATGATATTTTCACTATCTAAGGACTATTTTATTTATTTTGTACTTATGATTTTCAGGGG  
CTATTATTGTTATTATTAAAGTTGATCTTAGTCTTTTGACCATACACTTAAAGACAACCTTTTAATCGACCG  
GAGGTTGTATCACATTCACTACTTGATTAGATTATGGAATGTACTTTTCTATGATGTTCTAAAATCAATCGCA  
TCAAGATAAGATTGTTTATATTTTCAACTCGCAATTTTTCTGTAGTCTTACTAAATCCCTGCATGAAATGAA  
ATTATATAAATCTAATTAGCTTGAAATTTTTTGAAAATTTTGGTTTTCTCCACGAGAAGCTGCTTCTAGCGG  
TAGTCTTGTTAATAGTCACTTCAAGGTGTTGAAATATGATGACTTTTGAGAACAACTCTCAATCCAACAATC

TTAGCTACATATAACATGTTGAACTGATGTGTACAAACACAAGAACAGATAATGTCCTTGAGACAAGAGTCAT  
TGAAGGTGCTTTTCCAAACAAATCAGCTAACAAAGGAAGAAATACAGGAAGTACCAGAAAGATTGTTCAAATTT  
AGAAGAATATTCTCCTTGAAAGCATTGCAACAAGCCATAAACCTTGAAAAACACAGTTGGTGAGGCCAGATG  
CAAAATGTGACAATTGTCCAATCTTTTCAATATTTTACAGTCTAGATTATTTATTTTTTATTTTCTACTCGAA  
AAACAAATTTGAACCTTTACCAAACCTTATTTTGATCCAATAGTTATTAAGTCACCTTACTGCTTTGCGTTTT  
GAGTTCCTGCAGGAGAAAACCATAAAATATTTAGTTTGGATATTTTGATAGAAGAATTTTGAAAAATGTCCAATT  
CACAGTGAAGGAATTTCTCTATCACTTTTAGGCAGCTGATTGCTTTTATTCTGTCATAGAATCGTGATCTGTG  
CTCAACGAACCTTTCTTTTATTTGAAATAACTTGTTTTCAATATTTATAGGAGAGAAAGAATACTATGAAAAA  
CAATTTGTCTACTCTAAATCATTTGAGGAAGTTGACTCCATAGTAACGGCTGACTGCACTGATGTAGAAGACA  
TTGAAAAACAAGCTCAACATGAACGAGCAATGAAGATTTCTAATTATGCAATGCAGCTTTATTGGCAATGAA  
GGTGATATTCATAAGATGTATATATTCATTTATCACTAAAACCTCAAGTAGTCTTCTGAATAGAAGGCATGT  
TATTGAAATTTTATAAGAAACAGTTTCTGACACAGTTATTTGAACTTGTCCTAGCATAAGCTCCCTTGATTTCT  
GGTTAATTGCATGTATCATACTTGTGACACTGGCTTAGTTAAATAACAATATTTATATGCATATCTAGATTT  
ATGTGACAATAAGGAGTGGGTCAATAGCGGTTGCTGCATCAACATTGGATTCTCTGCTTGATTTTATGCGCTGG  
TGGCATACTTTGGTTCACTCACATGGCAATGAAGGATGTAAATATGTACAAATACCCAATTGGAAGTTGAGG  
GTGCAGCCAGTGGGCATAATTATCTTTGCGGCCGTCATGGCAACACTTGGTGTGTTGAATTTACTTAGCCTAT  
TTCTTACTTTCAAACGTGTTTATTTCTTGTACTTAATGTCAATTATCTATAATAATTCCTTCTCTTGGGAGGT  
GCATGCAACAGAGTTGTTTGTGTTTCATTTAAATAATCTTTTCATCAATATTTCAATTTCTCTTTTCTCTCTG  
ATGAGTATCTCCATGCAGATTACAATGGTGAACCTTATGCAAAATTTTCTCATTTTGTAACTTCAAACCTCAAT  
TGTGGTATACATATGTACCTCATGACTCATGCAAAATATTGCTAAGACCATTTTATGCCTCAAATTTCTATGA  
TATTGCCGTTGTTTGTGTTGAATCTGACTAGTTGAAAGTTCTAATGTTAGTAACTTAAAGATCATACCTTTTCA  
TGAACAACCGTTGAACAGAACTTTAAATGATTAGGATTTCTAATTTATGGAATTCAGAATGGCATTGAGCTT  
AAGGTTATAGCTAACGATAATTTATACTTAACACCGGTTTATATGGTAAGAAACAATCATCTGTTTCTCTCA  
ATAATTAGAACATAAATCAGAAGATCCAGTGCCCAAACCTTGCCATACAAAATTGATAGTATTCAGCTTTTTTA  
TCATACTAGAATCTGAGAATTTGAACCTATTTTGTAAACATATTTAAGCATACATATAAATGTTTCTGAATC  
TAGTATACTTGGGTATAGATTATATGTTTTTACAATTGCTTATAGAGCAACTCAAAAGTATTCATATAAAGG  
AAAACCCAGTGCCCAAGGCTCCACCTTGTTGGGCTCTGTTAAGATGTCTTATGATCAATTAGTATGAGGCAAG  
GCACAGATTCATTTGGAACATGAAAAAGAATAGATTACATATAATCCATTTTGATACAGGCTTTCAGGTATT  
AATCACGGCTCTAGAACAGTAATAGAAAATAATCCATCTGAGAAGATGTCTTATGATCAACTAGTATGGCTG  
TACTCTATTATGATATTAGCAACAGTGGTGAAGCTTAGTCTCTGGCTTTACTGTAGAAGCTCAGGAAACAAAA  
TTGTCCGTGCCTATGCAGATGTAAGTGTCTTCTCTTTTGAAGAATAAATGCTTTATGAATTGAGTTAAGAGA  
GTGTTGCAACATCTTTCAAATTCCAACTGCAGGATCACCACCTTGATGTTGTAACAAATGTGGTTGGATTAG  
TTGCGGCTGTTCTTGGTGATCAATTTTACTGGTTGATTGACCCTGTTGGTGTCTATTTGCTAGCAATTTACAC  
TATTACAAATTTGGTCTGGCACTGTAATGGAGAATGCAGGTGATTCTGTTACTATATCCATATCAGAATTCCTA  
TACTTAAAGAAAAGTCAAGCATTTGCTTTGTAAATTAATTACTTTTTAAAAATAACTTTTGACTTCTTAAAAA  
ACTGACCAACTATAAAAAAATATGCTGAAAGAAAAAAGGAACCATAACAATATGATAATTATTAGCAAGAAGT  
CTCAATATCCACCTACCTAGTGTGTTTGGTGGGATGATAAATCAGTATTTCCAGGGAGCACTAGGCATGCCAAT  
CGTAAAAAGTACTAATGTGTTAGTCAAAGAGAAAGTACTTTCTGAATTTCACTATGAAAAGATTTTTCAT  
ATAGAAAAATAATGAATTATTTTGTGTTGGGTAAGCTATGATCAGCTGCACCTTCCTTGCAATTACCTTATAT  
TAGAATGGATTGTGGAGGTTCTTATTATGATAACTTGCTATGCAGTTTCACTAGTGGGACAATCTGCACCTCC  
TGAAGTTCTGCAGAAGTTGACATATCTTGTCATAATGCATTCTCAAATTAAGCGCATTGACACTGTCCGCGCC  
TACACATTTGGCGTTCTATATTTTGTGGAGGTATGCGTACAAAATCAAATTTAGACCGTAACCTTATTATAT  
TTGTTATTTAATTTGACTTTCCAATGATAGATACATACAAGAATCTAACCTCCCTTTTTTGTAAATATTTAA

*CrMTP8.1*

GGCAAAGTATTTTGTTCCTTGCATAAAACATACATTACCCTATTCTAAACATGTGTTGTTGTTT  
CTATGACTTTTCTTTTGTATGGATTGTGAATTTTCATTATTATTAATTTCACTTTCTTATAATTTTGAA  
CATAACATTTGATGTTTCATCTCGTAATATTTTGTGCTTGAATTTTTTAATAAAGTCAAAAATCAAAATAA  
TTAAATCAAACAAAAGTGTCAAAAATTAATTTAATTTTATAATATATCTCATTCAAACCAATCAAACCGTA  
AATATTTATTTACAGCTGATTTGGATAGTCTTTTCTGTAAAATCATAACAAATTGTACCATAGACACTCCAC  
GGTAGTATATTAGAAATAATTTTACATCCAATTTACCTTGAAAAATGTTAACAAATATTTGGTGAATAAAA  
TTAACAGAATTTTTTTTTTAAGAAAGAGGGAAAAGATTCTTGATGGATACTGTCCATATTTCTCTTATTT  
TTCTAGTTTCTTCTTTGTACTAACACCAGATGTATAAAATTAATGTTTAAACATGTAGGGACTAAAAATGCCT  
GTTTGTAATCGCTTATATCTCAACACTAATTTTCAAAAGCACCAGCAGAAAACTGAAAAATAAGCATTAT  
TTCTTCAAAATAAGCTGAATCAAACATACACACTTGGCACAGATTTTAGTATCAAGAACTGGTTTGGCTTCA  
TAAATTTTGAAGGCATGGCAAAGAAAAGATGTAATAATTTTATGGTGTATTGGTAATAGGTTGACATTGAA  
CTGCCAGAGGATTTACCCTTAAAGAAAGCACATGCCATTGGAGAGAGTCTACAGATAAAATTAGAGAACTTC  
CAGAAGTTGAGCGGGCATTGTTTCATCTAGACTTTGAATGTGATCACAAACCAGAGCACTCGGTTCTTAACAA  
TCTGCCAGACACTAAGCCATAA  
ATGGACAGGAATTCGGGTTCCGATCCCACGTGGCCGCTTCTGGCAAAGCTTGACCCGAACCTCCGCCGATAACG  
GCAGCCGGAGAGGCCGACTCAATCGCCGGAACCTCAGTTAACTCGCTCAGAGCAGCCTTCTGTCCAAGCTTCC  
CGAGAAGGTCGGTTCTGGCATTGACTCCGAGGCTCCCTTCGACACTGATCTCTCTTCCACCACCGCTTAAGC  
AAAGGTCTCTCTATATATCTATCTATCTATATGTATATATATGTATGTATGCTTGGTGTAACTCTGTACAG  
AACAATTGCTCAGAAAATTCATGATTGATTTAGATGAAAAGTTTGTATTATACATTATCAGCGCATGAAATC  
TTACATCGATTATGCTCATAAATTTGTGTTAGGTATATCTTTCTATGATGTGGAATGTTCAATCCGTATTAGT  
GATAAAGGAATTGTTTAAAGAGAAATATATTTGTAATTTTTATGTATAATAAAGATACATAGGGAAGATCAA  
TAAAGTGTGTGAAAAGAAAAATAACGTAGTGAAGCGAAAAGTGCTTTATAAATAATAAAGTCATTATTTA  
ATATTGTAAAAGCTTTGTAATCTGTGATTTTGAATCACAGATTTGATTTGATTAAATTTTTTAATCTCTTTC  
AACTTACAACGTGTTTGAATGTCTGCAGGGGAGAAAGAATATTATGAAAGACAGTTCGCTACTCTAAATCAT  
TTGAGGAAGTGAATACATGGTGTCAACAGACTATGTTGTTGAGGAGGAAGACAATGAGGAACAGGCTCAACA  
AGAGAGAGCAATGAAGATATCTAATTATGCAAATATAGCTTTGTTGATATTAAAGGTGATATTCATATTTCT  
ACAGCTGTTGACTAGACAACCTGGTTTTCAATTTGAAGTAGCCACCAGGTTCTTAATTATGGAGGACAAAACC  
TAGACATTGTATGATAGATACCCTAGGTATTTTCTCCAATTAATAATCAGCATTTTATCTCGGTAACCTGCTGCT  
TTGATGTCAGTAACTAAAATTAACAGCTATTGAGATGAGATGAGATGCCAATTTTAATTAGAAAGCAACTCTA  
ACAGTATAAAAGGTATTGTATTCAAATTTTATTTTACAATATAACCTATGATCGTAATAGTTTTCGCTTGATT  
CTGGTGAGATTTCAGATGAAGCAGTTTCTGACAATTAATTATTTGAACCTGTTTAACTATTGATTAGCTTCTT  
AAGTGTGTTAGTTTTACTGTACTTGATGATAATCCTTCTGTGAAATAACAATATGCACATCCGTATCTAGAT  
CTATGCTACGGTTAGGAGTGGGTCAATAGCTATTGCAGCATCAACTTTGGATTCTCTGCTTGATCTCATGGCT  
GGGGGCATACTTTGGTTCACCTCAGTTGCAATGAAGAACATAAATATCTACCAATACCCAATTGGAAAGCTGA  
GGGTGCAGCCAGTGGGCATAATTATCTTTGCTGCCGTCATGGCAACACTTGGTGAGTCAAAACCGACTTAAATA  
ATTCCTAGTTTCCACACTGTCTATTCTGATGCCACTTATATGCATATATCAAAAACATTTCTTCTCCTAAGA  
GCTACGGAATCTGTTTCATTTAACTAAATTTATTTTCAATTTTTATAGTTAAAGATGCTTGATTCAAGTTTTC  
AATTTGGATGTGCATCTGTGCCTTATGCTTAAAGCTTAAATGTATACCAATTCAAAGGAATCAAATTTATTTAC  
TATTGCTCTTGTGATAGAATCTGACCGGTTGAAAATTTCTAATGTCTTCGGCAAATTTACAGGCCATATCAT  
TCTGTAACTAATATTTAACAGAATTTTAAAATTTGTTGGTCATAGCTGATGACAGGTTATTTGCAGAGTTT  
ATAAAATGATGATAGGGGCACCACTGGGTAAGATAGATGTACGTGTTTTTCAATGGACCATAGTATGAGAAAA  
ATGTGCTTCATTGGTATCTTTCCCAAGTTTTTATATATTAATAGTTTGTCTTTTGCCCTCAAAGAAATTGACA  
ACATATGCAGCTTTTGTGCTGCTAGAATCAGACAACCTACTTTTGTAAATGAAACAATGGATAAAATGTGAAC



CrMTP9

TTCAACATACTACATGTTCAAATGTTTATGGTTAGAAACCTACTGCTTCTGAAATTCATATTTTGGTACTAC  
AGTTTTTCACAATGTTGTTTCGCCTAGAATCACTGAAAGAAATGCGTACATTGGCATGCAAGAGATTACATGATA  
CGTTTGAGTTAATCCATTTTGGCTACAGGCTTTCAAGTATTAATCACGGCTGCTGAACAACATAAGAAAAACAG  
TCCCGCTGAAAAGATGACTGCTGAACAACATAATATGGTTGTACTCTATTATGTTATTTGCAACGGTGGTGAAG  
TTTGTGCTCTGGCTTTACTGTAGAAGCTCAGGAAACCAGATTGTCCGTGCCTACGCAGATGTACGGGTCTCTTT  
TCTTCTGATGTTTGCTTTATAAAACAAGTTAAATACAATTGAACCATCTCAGAAATGCCAACCTGCAGGATC  
ACCGTTTTGATGTTATAACAAACGTAGTTGGATTAGTTGCTGCTGTTCTCGGTGATAAATATTACTGGTGGAT  
TGATCCGGTTGAGCTATTTTGCTTGCAATTTACACTATCACAATTTGGTCCCACTGTCATGGAAAATGCA  
GGTATATCCTTACCAGAATCCAAATAGAAAAAGTTAACAGAAGAATTTATGCCAGTGAGAGAAAACCTTGG  
TAGGAAAATAGCCATATATAGTGTTCAGGAAGCATAAGTCACATCAATTTCTATGCAGATTTTTTTCACCT  
CTTGCTCTCACTTCTTCCACCGGTTCTCTTAAATGTTGGTATCAGTCAAAAGCGAAGTAGTTTCTAAAATTTT  
CCCTACCATGAAAGAACTTTATTTTTTAGTCAACCATGAAAGATTTTATACGCTGTTCTTTGTGCAGTTTAATT  
TTACTATACCAGCTGAATTATACACTTTTTTCATTAACTTTTAATTAATTAAGCAAAATTTATTACCAAAC  
TGGTATGAAGCATCAATTTCTCTATATTATATGCGATGTGTTTGAATATTGAGGTAGGAGCAAAAGTGAAT  
CAGCGAGTGATGCTCCAGCTTTTATCTAATTCGAATGCAGGCGAAAATTAAGGATATTTGGCTCCATAGGAAG  
TTTAGCTCTATTATGTGTCATGACAACAACCCCGATCCCCAAAATAAACAGAAAAAGGACAAATCAGTTT  
GTAAATAAAATTGTATTAATTTCTGACTGTGTAACTTCTATGCAGTTTCATTAGTTGGACAATCTGCACCTCC  
TGAAGTCTTGCAAGCTGACATATCTTGTTATAAGGCACCTCAAGTTAAGCGCATTGACACTGTCCGTGCA  
TACACATTTGGTGTTCTATATTTTGTGGAGGTATGCTGTATTATTCAAATCAATTTAGAGGAGCACTAACCC  
TCATCGCCAAAAAGAACTAATGTTGATTTTTTAATTTGGCATTCTCTATTAACGAAGCAATACTTAACAAGA  
CTCTAGCCCTGTTGTTTTCCCTTTTCTAGCACCTAATTTAAAAAAAGTTATTGTCAACTTATTTTCACATTAA  
CATTCACCTCCGAGGAATGCATGGCAATTATGGTTACTTATAGATGCGATGTCTCTAAGCGAGCTCTATTATGT  
CATATAAATTATATTGAAGACGACAAATGTTATTTGTTATGCCTCATGGCTCATGATTTGGGTTTGATTTGGA  
ACAGGTTGACATTGAACTGCCAGAAGATTTACCCTTAAAGAAGCACACGCCATAGGAGAGACCTACAGATA  
AAGCTTGAGAAGCTCCCAGACGTTGAGCGGGCATTGTTTCATCTAGACTTCGAATGTGATCACAACCAGAGC  
ACTCAGTTCTTAGCAAACCTGCCCAACAATTAG  
ATGTAATGTCGGCGGGTACCAGCGGACACGGCGGCCCATCGCCGAGACCGGCAGAAGGGAACAACCTCTGG  
TGGAACACAGTACCGGTGACACGTCGTCGTTTTCTGTTGAGACTCAATCTGAAGGAGTTCCAATTGCCACAGCA  
AACTCATAATAACCATAATGATCGTCACCATCATCATCCTCTTTCCCTTCACTTTCCATGGCCTTCTTCGCAAA  
CCCAGTGAGTCATTCTTTCCCTCTTCTTCAATTTACACTCTCTTTGGTTTTATCTTTTTATTTTTATTTTTT  
TTTGCAATAAACTTGAGTTCTTTGCATTTTCAAAAACTCTCATGCTTAGAAAAATGGGGATCAAAACAACTT  
AAAAAGTTTAAATTATAAATTTTGATAGACTTAGAATCAGTAACATTAGGGTTAAATATAAATTTTCTTTTT  
ACAAATTTTAAATTGATGTTTATATTTAATTTTTTATTACCTCTTCAACGAATAAAATATTTTAGATAATC  
TAGATATTAGGTTTGTATACATTATTATAATGTTTCTGGTTAACGTGGTTAACAAATTATTGATGTGATTGT  
TTTACTCTTTATATATATATATATATAAAGAGTAAAAATAATTATTGATGTGATTGTTTTACTCTTTATATA  
TATATATATATATTATAATTTTAAATTTTTTATATGTAATTTTTTAAAGTTAATTTTTATATTAAATATTTT  
AATTTAGCTTTTAAAGTGAGCAAAATATTGAAGATTTGTTAGATTGATTTTTATAATAAATTTTTTATTAAGA  
ATATGTTACTATTTTATTTGACACTTTCACCTTATAAAATATAGATCCTCATTCACTTAAATTTATAATTTGA  
TATAAATAAATATGATTTACAATTAAATATTTGAGATCTCGAAATAATAAAGTTAGTTTATATATTATCAAA  
GCAAAAGTACGTGGATAAATAACCAAAATAGTAATAAAAAAATAAATTTGTCGTTTTCACTTCCGGAAACATTT  
TGAAATTTGGTAACATCAATCTTTAAAAAATTAAGCTACTTTTTTCGATCCTAAATATAAGTCGTTCTTTTT  
TATATATTTTTTTTTGAGGAATAAAAAATTTACACCAAAAAGAAATTAATGAATCATTTTTATTTTTTATG  
GAAAAATTTATTGAATTTTACAAATTTATGCTATTGTTAAATTTAGAGGACAGACTTATTGAATTTTACAAAT

TATTGTATAAAGCCCATATTAATAGTAAAAAATGCTGACAAGTGTACTTCTCAATACTTTGTGATTGATCCA  
TTTTATAAAATATAAGCAATTTTTAAAAAGTGATAAACTTAAGAAGTAAGTATTTTAACCTTTTAAAAAATA  
AATCAACTATAAGAAGTTTATTTAAAAGAAATGTGTTATTAACATTTACATCTCTCACTACCTCCTCAACTTA  
AGTAGATATGTTTATTTTGACTCTCTCTTAATTTTTGGATTTATTGTTTTTTTTTTTGACAAAATTTTCAA  
ATCTTGGTTACAAGTCCCTTTCAGAACTACTTCCATGACAGATGAAAATTTTAATCTTAAGTAAAGTGAAGA  
GTAAGTCTATCCAATTTTAATTTGCAATATTTTTTATTTAGTATAACATAATTTAAATTATTGTTGTTCTGC  
ATAAAATTTTAAATTTAAAGTTTGAAAAGTTATAAAAGAGAAAGCTAATGGTCCCCATTATAGCAAGAACCT  
TTTCAAAATATCAGGGTCTATTTCAAAAAAATTTGTGTTATGAGGGACTAAATTTTTTTTTAAAAAAGTACTA  
CATATAAATATCAAACTAAAATTAGGAAGCATCAAATTTAAATTAAGAAACATCTATAGGAATCAATCTATAT  
TTCAACGAAAAGGGTAAAATATATATTATATCAACATCTGTTAGTCATATCAACTGCACAAAAATGGTATTTT  
GACGGATCTAAATATTAAGGATTATTTTAAAAGATTTTTCATGTACAGGAACAAATTAATTTATTTTACCTA  
AAAAATTTAAATTATTCAACACATACAGAAATTAATTTTCATATTTTAAATATTAATTTCAAAATATAAAAT  
GTAATTTATTTTAAATTTTATAGAGGTTAAATGAATGATTAAGGATTAATGAGTTTTTTTTTATTT  
CTTAGGATGAGAATGATAAATTTTATTTTAAATAATTAATTTCAATGATAAAAAGTCTTTTAAATTTGACG  
TCTTAGTATATGACCTCTTAAGTATTTGATTTTTGCAAAACACAGGAAGAGGAATTTTTTTTTCTCTTGTT  
TGTGTCAGTAGTCTAGACGAAAGAAATGAGAAGGAGGGGCTCATAATTTAATTTAATTTTATATTTTGAAT  
ATCTTCCAATATTAATAAAGAATAATTTACAATAGTTAGATCTTATTTACTAATTAAGTTATCTTGAAATT  
TTATGTATTTTGTTAATGATATCTGTAAGATATAATAATTTTTTATTTCTTTGTATTTTAAATAAATTA  
TATAATCCTGTATTGAGATAATTTATTTCAAGAGAAATAATTTGTTTTTAAAAATAATTATAAATTAATTAAT  
AAAAATAAATAATTATTTTACAAGAAAATTAATCAAATAAAAAAATTTATTTCTTAATTTTTTTTTATTTG  
TTAAAAAAATTTCTTCTTCTAAACCTAAACTTAACAAATAAACCAACAAGATCCTTTTAAATAAAGGAAA  
AGAAACCTCTTTAATATATATATATATATATATATATATATATATATATATATATATATATATATATATAT  
CTTTATTTTTATTTTGTTTTTTTTCTCTTTTAAAGTGAATTTTAAATAAAGAAATTTAAAGTCTCTATT  
TTCAACCTTTTAAAGCAATAAGTTTACAATTTAAAAAAAATAATAAGAAAGAAATTTTTTCAACAAAACATG  
CATGGCATAAAATTTTCTGTTATGGATGGGTTGAGTTATGTTGAATTACATGTTGTTTGTGTTGTCGTAGCCAT  
GGAGGAATCTTGGCGCAAAATGAACTTTTTCTTTTGTCTTTCTTGATTGCGTCGGTGGGGTTAGTTTTTTT  
ATCTTAAAAAAGAGTAGGTTGAAAAGTGAATCTTGTGAATTAAAGTTTATACCACCTTGCAACTGAA  
ACTGAGTAGGAATTTAATTTATTTTCTTGAAGAAAATGAGAAAGCTTGATTGATAAATTTGTATGTGTAATT  
GATACGGACGAAAGGGTCATGCCTTTTTAAATTTTAAAAATAAAAAATAATTATATTAATAAAAAATATATTA  
AAAAATAAAATTTTTTAAATAATTTTCTAAATTTGTTTAAATAAAATTTATATTATTAATATATATAT  
TTTTTTATTCATTTATCTAAATAAAGAAAATAAATTTTTTTATTTTTTTATTTATTTAAATAATCTTTTAT  
TTCTTCTTTCATCCAATAAATTATAATTATTATAATTATCAAGATAGATAGATGATTTTAAATTTTGTAT  
GTTCTGATTAATAATTTAAATTTATTTTCATATAGTTATAAATTTTTAATTTTTAAATTAATTTTAAAAAAT  
AATTTATTGAGTACAATAATTTTAAAGTTATTTTTAATATATTTTTTAAATAATTTAATTTTTTAAATTA  
AAATAAATTTTTTAAATTATTATTTTAAATTTTAAAAATCATACAACATATAAATTATCATCACTATTATCA  
TTATTATAATTACCACTATTATTTTTATAATTATAATAATAATATTTTAAATTTTATTATTTTAAATAAAAT  
TTATTTATTTTTAATTTTTTAAATTAATAATTTTTTATATATTTTTTATAATTTTTTAAATAAAATAA  
AATTATTTAATATATAAATTATATCTAATTTAATTTATTATAATATTATTTATAATATAATAATATCATATAT  
ATTACTACATGTAAATAAATATTTAGTAATATAAAAAATGTTATAATAATAATATGTAAATTTTTTTATTAT  
TATATTAATTATTAATAACATATAAAATAAAAAATATATTTTTATATTATAACAATCATTATCATTATTTT  
TACAATTATAACTATCATTATCATTATTACCAATAATAATAATAATAATAATAATAATATTATTATTATTAT  
TATTATTATTTAAATATTTAATTTTTATTATTTTAAAAAATTTAATTTAATTAATTTTAAATGATAATTTT  
ATTTATCTACTTTTATAAATTATTCAATAAAATAAATAATGCTATTTGATATATAAATTATTTTTATTTTTT

ATATAATTTTATATTACATAATTATTTAAATAAAAAATATTATAATATATTATTTTATATAAAATAAATATTGA  
ATAATATAAAAAAATAAATGATCAAATCTTTTTTACCTTTTTTATAATCTTGCGAATTAATTTTTTTTACT  
TCTTAAATTTTTTCGTTACTCTCTCATTTATAAATTTATCTTATAAATTAATCTTTTAATTAATTTTTGT  
AACTAAACTTCTTCAAAATTAATTGGTCTCGCTAAATTTAGTAGACTTTATAAAATTTTTGTTATATTTAA  
TAATAAAATGAATATTTAAATTTTTATGTTTTATGTACGTTATAAAATGATACCATTTTTAACCTCATCCACT  
TTTCCATCTCAGCAATGTGTTGTCCAGAGACCATTTTTTTTTTTTACCCTCCTCCACTCAAGAGGAAAGCAAG  
CAAACCTTCCCTCCATTCTACCTTCATCTTATATTACATCATCGTCACCTCTTCCTTCTCCACCATTAATCAT  
CCAAATCTTCTATTATGTATTGAGCTACCCTCAATCCACCATCTTTTTCTCCTCCAACATATCAATGCCTCC  
TCCAAGTCTACCACCTACACCTTCTTGCACCAAAATTCACATGCACTAAATTTACAGTAATTTATTC  
GCTGTAATTTTTGGCATATTTTTCTTTTTTAGTCACCTTTCTGTCCATTACAAGAAATATCACACCTTCGTT  
TTTAAATTTGAGAACTTTATAAGTGTGAATGTTAAAGCAATGATCATACTCCATAAGTTAACCAAAACTAA  
AAAGATATATTATAACGTTATATTAAAAATTTTCCATTTTTTACCAAAATAAAATTTCTTAGAAGGTCTAA  
TTATTGAATTTAAAAATTTATTTTTAGAAAGAACTAAATACTAAATAATAATAATAAAATAATAAAATAAA  
ATAATAAAATAATTAATTAATATCTTGATTTAAAAATTTAGTATAATATTTTAATTTATTTATTTTTTAA  
GTAAATTTTAATTTGATATATTATGTCACTTTAAAAAATTTAAATCATGAAAGATAATTTCAAAAAATAA  
ATACTTCTACAACCTTTATAAAAAATTTTACATTAATCCTAAAATTTTTTTATTAATGAATCTTATAAAAG  
AATCTAAGAGATTAATGAGTAATCTAAATCTTTAGCTTTTATTTTTGTAAATTAACATTTTGATAGTAT  
AGAAATAAATAAATATTTTATTAATATAAATTTTATGATAAAATAATATTATAAACTTAATAATTAGCATA  
CTAAATTTAAAGTATATTTTATATTTAAATAAATAATAAATTTTTATAAAAAATTAAAAAATATAATTA  
ATTCTGTTAAATTGATTCTTTAAATATCTTATATGAATGAGTATAATTTATTATTTTATTACTTGATAAAAT  
GGTAAAAATTTTACTAGTTATCTATATATGTAGAAAGGAGGAACATGAAACAAACATTAATTTTTTCT  
TCACAATTTTATAGTGAAAATTTTATAGCATGAGAGAAGGTATAAGTGATGAAGTTGGAAGAAACATAGGTAG  
GAAGGAATCTTAACATAAAATATATAATTATATAATATCTTTACATTATAACCATCATAACTATCATTAC  
TACATCACCACCATCTTATCAATACTACATTTATTATCATTATCATAATAATAATAATAATAATAATAAT  
AATAATAATAATAATAATAATAATTATTATTATTATTATTATTATTATTATTACTGTAATTTAATTTAT  
TTATTTGAAGAGAATTTAATTTTTGTATTTTTTAATTAATTTTTTGTTATCTCTTTTTTATAAATTTATTT  
ACTTTTGCAATAATTTTAAATTTTAAATTTAAATTTAAATTTAAACTGGATTTAATTTTAAACTAAAAA  
TTAAAAACATTTTCGACAAGAAATAAACTAATAAAAAAGAAATTATGAAATTTTAAAGAATTTAGAACTAAAT  
GTCATCTTTAAAGTTCTAGTTGATCAACTTCTTAACCATATTTATAAAAAATTGATGTCTACAAGCTAATTAA  
ATTTATTAAAAAGTTGATTATTTTTTTTTCTTTTTTACTTACAAGTATTGAAGAAAAATCTTATCCAACTT  
GGCAATAATATTCATGATGCTTAAATTATGCATATATGAGATAGCATTTTCATCTAGCTTCTAAATAGATCGA  
TTTATGGAACGTGTGCTCTTCTACTGCCTAGGATTTCTATTAAACATGTTTTATTACTAAATTGGTAACTC  
TAATCCAATTTTGTTTCTGAACTGGTTTTCTTCTAAGCAACATTGTGGATATGTTTTGATTTAGAGAAAGCA  
ACGCAAGGTTGCAGAATACTACAAAAACAGGAGAGGCTCCTTGAAGGATATAATGACATGGATACTATGACT  
GAAACGGGTTATTTTCCAGGAAGTCTCACTGAGGTTGATTATCTATCACCTCATTCACTTATCATAGTTTA  
TAGATTGACTTTAATCTCAGTGAAATTATCATATTTCCGTTTAAATAACAAAGAGAATAGCATGTTGTAAC  
ATCCAGAGTATAAACAACAACAACAAATGAAACAATGCTGAAGATTAACTATATTCTCAGCAAACTATCAA  
AATTTCCATTTAAACTTGATAACCTCAAACAATGCTGATGAGTAATTTTTTGAAAAAAGAAAAAAGGA  
GAGATAAAAAATATATTTTGAATTAACAGTAAATAGTTCTCCATGTAGGCATTAGAAGTTTATCTTTAACT  
TTAAAAATATAATGTAAATTAGTTTTTTATTTTTAAAAATATTGTAAATTAGCTCCTTCATTTATTGAAAT  
AATGCAATTAATTTCTCTGAAGATAATTTGTAAGATTTTTAGATAAAGAACTAATTTATATTATTTTAA  
ATTAACATAAATTTATAATATGTGCATAAAATGAAAAATTAATTTAATATATTTTTATTGACCAAAATGTGA  
AGTAAAAACAATCGATAAAAGAGAATATATAAATGATGATCAAAGATGAAATATATATACATATATGTATT

GAAAATACTCTTCAACTGATTAAGATGTGAATCAAATTAATTTCAAAGTAAAAAATATATTCATTGA  
TCAAATCATTCCTCAATATAGCTGATGAATTTTTTTTTTAAAGAACTCGTTAATCAGGCAAAAATAAGAT  
AGATCCCATTCTACATGACAATACAGACAACAATAAAATTTAGGATGCTATACAACAATTTTATGGCATAACG  
GATGATCTATCGTCCAAGTTTTGTGATTTTATTAGACAAATAATCTGGTTTTAAAAATAGGTGAATCACAGTC  
CAAATTTTTATATTTTTTAACTATTGCTGATTTTTTCACTCTTAGTTCCTTATTAGTCCTGATTTTTATTGTC  
TGTAATTAAGATAAAAGTTGTTTGTCTTAAATTTTTTACGAGTATTTTCTAAACAACAGAACATTAGATGTT  
TCTCAGGATGAAACGAAGCAACTAGCAAAAAGTGAGAGGTGGCAATTAATGTGTCAAATGCGGCTAACTTGG  
TGCTATTTGCGGCAAGGTTTATGCTTCAATTGAAAGCAAATCATTGGCGGTGCTTCAACCTTAGATTC  
TCTTTTGGATCTGTTGTCAGGGTTCATATTGTGGTTCACAGCCAATGCCATGAGAAACCCAAACCATTATCAC  
TATCCCATTGGAAGAAACGGATGCAACCAGTGGTATGTTAGACTCATTCTTTGTTTGAAGAACTCATTAATTT  
TTAAGAAATAATTCCTTAGTTAAAAAATTAATATATTTTTTAATCTTCTAAAATTTTAAAAATTTAATTTT  
AATCTCTCATTTTTTAAATATTTGATTTTGATTTCTTATTTTTTAAATAAACCATTTTAATCTTAAAGTA  
ACTAATATTTAAGGCATCAATGTTAAAGGATTAAAAGTAATTATTTTAAATTTAGGGGATCAAATTTAATGAT  
TTAAAAATAGAGTCTAAAATTAATATCAATTTTAGAAAAATCAAAATATATTTAACCTAGAAAAATAT  
TCCTAAAAATGATGAACTAAACAACCTGCTCTCTGATTTCTTTTTTATCTATCGAGAGAGAGTAAAAATA  
TTTGTCTTATTTTTTATTTTTAAAAAATATTAATTAATATTAATTATTATAAATTATTATATGTACCATTTTC  
ATTACTTAGAGAAAAATTAATTTGTAATTAATGAAAAAGCTAAAAATGATGTTTATAAAGGACAAATCAGA  
AAAGTAAATAGAATTTTTTAAAAAATAATTATATTTTTTAATATTTTTTACTTTTTATATAGATAAAAAAAT  
AAAAGAAAGAAATATTATATTAATAAGTTAAATTAACATGCACCTAATGTTAATGTTGATATGTTAGTTT  
AAGTTGAATATTGAGTGAAATTTTGGTAAATGTAGTCTAGCAATAGTTTTCTATTGCATGAGTGAATGACA  
ATAATTGGATATGTTTAATCAAATTAGTCATTGCATTTTTGAGACTAAGAGACATACATATTAATATTAACC  
AGGACTTTCTAGGCAGGGTATCATTGTTTTTGTCATCAGTGATGGCAACCTTGGGATTGCAGATTTTGATAGAG  
TCTGGCGGCAACTGATTTCAAAGTAATTGAGTTCAGAACTTGTAAAGCTTTTGCTCATTGTTATGAATTGTG  
AAGGTAGCACAGTGAATTGTTCTATTTTTATAGATTTGTTTTGAACCTTTCTGTACAACATTTTTTAATAT  
CTTGTTCATTGGTATATTTTACAGTCTAAGCCTGAAATGGATCTTGATGAGTTGAAATGGATGATAGGGAT  
TATGGTATCTGTCACTGTAGTAAAGTTCATTCTCATGGTTTATTGTGCAAGGTTTAAAGATGAAATTATCAGA  
GCCTATGCACAAGATCATTTTTTTGATGTCACTAATTCAAGTTGGATTAGCTGCTGCTGCTCTGCTGTCA  
AGTGCTCTTGGTGGATTGATCCTATAGGAGCTATTATTGTGAGTCTTTACTACCATTACATGGCTTTCTTAC  
TGGATATTCCTTTTTTGAAGCAATGGATCTTATGTTAAAATTATGTGATCATGTGAGATGAAATCTTGAGTT  
TATCTCATTTTTTCATAGACATTAATTGAGGGTCATTTGAAAGAGGTTATAGGAAACGTATAAAAAATTTTATG  
AACCTAACAAAGTTATTTTAGTTTATTTTAATAAGTTTTTTTTTTGGTTATAACTTATGTTCTTTAATTTATTT  
TAGGAAAAATTATATTTATATTTATGAAATTCATTAATAAATTATCTAATATCTTTTTATTTTTTATCTAC  
ACATTTTTTAATTTACAAAAATATAATATTATATATCTCTTTTAGCTATACAAATCTATACAAATTTTTCTAC  
TTTTTTATAATATTTATGTATAAATTTTTTAAAAAATATAAATATTTTTTCGAAAAATCTCAAGGAATAT  
CAATATAAATTAGTCTTTATTCTAATATAAATTAATTTTATGATCATATAATAAAGGTAATAAAAAATATTT  
AATTAATTTTTTTTATCTAACTCATTTTATGTAAACTTCATTAAAATTATTTGTAAATATTTATAACGAAA  
GGAAATAAAAAAATTCATACCACAAGTTAAAATTTACAAAGCTTATAAAAAAGAGAAAACGACACATAAAAA  
GTTACAAAATTTAAACAGATTCCATTTTCAATTTTCTTATGAAGTGTTTATCATTTGAATATTTCTATTAGTA  
TATTATTTTCTTTGACTTGGCGTAATGCTACAAGGGTCATAAACACAAATCATTTATAACCAAATTTCTCAATG  
ATTATTCCTATGTTATTTGTGTGTTAATCTGTTTGTACAGTAAACCAACTATAGCAAAATTGATTGTGATAT  
ATACCTGAATATCTAATGTAGATAGCAGTGTATACAATAAATACATGGCGAAGACAGTGATTGAGAATGTA  
TGGTCACTTATTGGAAGGACAGCGCCACCAGATTTTCTAGGAAAGTTGACATATTTGATATGGAATCACCATG  
AAGAGGTTAGGCACATAGACACCGTAAGAGCATACACATTTGGTGCTCATTACTTTGTTGAAGTCGATATAGT

*CrMTP9.1*

GTTGCCAGAGGACATGCCTCTCAATCAAGCACACAACATTGGTGAGACACTGCAAGAGAAGCTGGAGCAGCTT  
CCTCAAGTTGAAAGAGCCTTTGTGCACATTGATTTTGAATTTACTCACAGGCCTGAGCATAAGATGATGGTAT  
AA  
ATGGCAGAGAGTGGCGGCGGACCCCGCGTAGGGAACCGCTTCTGGTGTCGCCGGAGGAAGAGGCTGCAAACC  
CTTCGTGGAGACTCAATGTGAAAGAGTTTCGTTTGCCAACCCAACTAATGATCAGCAACATCACCATTCCCTT  
CACTTTCCGTGGCCTTCTTCGCAAACCCAGTGAGCCATTCTCTCTCTCTCTAAAGTTTCAGGTTTTCTGTGA  
TGGCTCTGTTCCTTTTTCTTTTATAATGATGTGTGAATTGTGCTAATCCAATAAGCCATTCTTCACTCTT  
TTCTGTGTTTTCTTCCCTTGAACGTCTAAAGTTTCTGTTTTTGTGAATGGGTATGGTTTGTACTTAGCGATG  
ATGTGTTGGATTTTGCAAACCCAGGAACCATCCGTCACTTTTTCTGTTTTTCTTCTTTCGAACGTCTAAA  
TTTTCTGTTTTGCGTAATGGGTATGGTTTGTATTTGGTGGTGATGTGTGAATTGTGTAGAACATCAATAAGC  
CATTTTTTAATGTTTTCTGATGGGTCTGTTTAGCAGTGGTGCGTTAGTTTGTGCAAACCTCAGCGTGCCTTTA  
TTGACCTTTTTTTCAGTTTTTCACCACTTCTTATTCTCTTTGATGTCTAAAGCTTTTATTGTGTTGAATCTCC  
AAAATCAGACTTCTCTGAATGTTTGAACCTTTAAAGTCTCCGACTTTGTGGGATTGGCCTATTTTTGTCTCT  
GTGGTGATGCTTTGAACAGTGCGAACCGAAGAAGTCGGAGCAGTGGTGTTATTATTAAACCTTTGTTTGTATT  
TATTGTAGAACACGGTGGGAATCTTTATTAAAGGAAAGACCTTTAATTGTAAATGTGTATCATTTTGGTGTT  
AGTGATAGTATCTAATTGAGTTTGGTATAATTCGATTCAATTGTCCAAAAGTAAATGAGTAGAGAAATAAAA  
AATACGGTAAAACTAGATGTACTACCATAAATATTTTTGTACTGTTCTCTAATCAAATCTTAAAAACAGAG  
TTTACCGATAGCCTGTGTGGGTCTCCGGGCTTGCCGAGCATGATGGATGTTAGGATCCAATTCTAACGTATA  
GGACTTGAGTCCACATTGGAAGTATGGATTCTAATGTGGGACTTTGGGCTCTCCATCTACACAATTAGCTTT  
TATAGTATGGTTCTTCCAAGATTCTTATCATAAATTTTTACTTTTATTGTGTCAGTTATGAATTAAACCTCAA  
TTTATTATTATTTTTTTGTCAAATGAACTCCAACCTTTAATGAAGAACAAAACGAAAGGATTTTATGAT  
ACTCCATCTAAGTTTTATGCTTGGAATAATGTCATGCCTTTTCGTATTTCTCCACAGTTACTAGTTAGTACT  
TAGTACTATTTCTGGAGACACTCCATTGCTCATTTTCATTATTTTTCTCTTGTAGAACTCTTGTACTTGATT  
CTATATATAATCAAGAAAAATGTAACCACACACTTTTCAATGAAATGCATTATTTGTTATTGGTTTTTTATT  
TAAAAAGTCATAGTACTTTTTTAAAAATGATTTTTTTTTAAAAATAGACTAATGCCTAAGCAGGTATGAAA  
CTTCCTTCCCTTAATGCTTCTCATATGATATACTAAAAATGGATCCGTTTTGCTTCTGAGATCATTTCTTTAT  
ACCTTTTATCATCTTTCCTTAAAGGATAACATAGTACTTAACAAAAGTTGACTATGTTCAATTACTTGTTCCT  
ATAACATTTAAATTTTAAAAATATTTAATTTTAAAAGGTAAGTGATTTGAAAATTTTGACATTGCTGGTTATTA  
GTTAGCTTGAGTAATTCATAATTGTGGACATGTGATGGTGCTTGGGTCTAGCTTGTGAAC TAGTTTTCATTTCT  
CATTTGTTTGCTACCTAACGCTGCCATTCAACGCCATTTTTATGTTTTTGCCTACTTACTCTCTATAATCTCAT  
TGTTAACTTATGTTTTAGGGAAGCAACGCAAGGTGGCGGAATATTACAAGAAACAAGAGAGACTCCTTGAAGG  
ATTTAGTGAGATGGAGACTATGACTGAAACGGGTGATTTCCAGGAAGTCTCACCGAGGTGATTGTTCTATA  
ACCATGATTTACTTAATGTGAAAATTTATAATTTTCCAATTAATTTGATCATATCAAACGCACACAAATGAA  
TGATTCTTTTGAATCCATTGAGAGAATCTACTAAATAAACATGCTCAATGTTTCTCAGGATGAAATGAAGCA  
ACTAGCTAAGAGTGAAAGGATGGCTGTTTCATGTGTCAAATGTATGTAACCTGGTGCTGTTTCGAGCAAAAGGTT  
TATGCCTCAATTGCGAGCAGATCGTTAGCAGTCATTGCCTCAACTATGGATTCTCTCTTGGATCTCTTGTCTAG  
GGTTCATATTGTTGTTTACTGCCCATGCCATGAAAACCTCCAACCATTATAACTATCCAATTGAAAAGAAACG  
CATGCAGCCAGTGGTAAGACTTAATTTAAACTGCACAAGGTGAATGAAACCTATAAAGTTGTAGTAAATGAAA  
TCTACCGATAGAGTTTCACAATATTTTGTAGAGTGAAAATGATAGTAAATGGTTTTCTTATTTTCTATATGATA  
TTGATTCTTAATTTAATCATTGCTTGGTTAGTTAATAAAGATACATGCTGATATGACTTCTTATGCAGGGTAT  
CATTTGTTTTTGATCTGTGATGGCAACATTGGGGTTGCAGATTTTGATTGAGTCTGCCGGGAACCTTATATCC  
AAGGTAAATGAGATCAACTTTTGTCTTGTGTTGTTCACTAGATTGAGGTGTATAATATAAGTGTCAATTATC  
CCTTTTTTGGATTTCCTGTAAATTTTACCATGACACTTTTTTATAAAAAATTTCAACTATCATTCTTTTCTAC

*CrMTP10*

AGTCTAAGCCTGATATGGATCCAGTAAAGCTACACTGGATGATTGGGATTATGGTATTTGTGACAGTAGTGAA  
GTTTGTTCCTTATGATTTACTGTGCAAGATTTAAAAACGAAATCGTTAGAGCATATGCACAAGATCACTTCTTT  
GATGTCATTACTAATTCAGTTGGATTAGCTGCTGCTGTGCTGTCAAGTCTATTGGTGGATTGATCCAA  
CAGGAGCTATTATTGTGAGTTCATATCCACATCTTATTTTCTCCTCACTCTGCTTTTTCTATAATTTTCTGAT  
TACGTTTCATATTTTCAACAAGTGTTTTTAAATGAGTTTACTTAGTATTTTAACTCTTTGATTTAATTAGTTTT  
TGCAAATTTATTTGTAGCTTTAAAAATAACAAATTAGTTCTTATTTTTTAAAAATTTAAAAATTAATCCTTT  
CATTTACTTAAATAATGTAAATTAATCTTTCTGAAAATAATATCAAGGAAGAATTTGATAAACGGTGATAAA  
TGTTGAGAAATAATGAAAAAGTGTTTTAAGTTAGGAAAAGTATTTATAAAAGTGTTTTGTCGTGATATATTTAA  
TTTTAGTTCTTCCAAACATTTTTTTTGGTTTTACTGCTCGATTTTCCAGAGTCAACACTTTTGGTTATTAG  
TAACTGTTAAATGGTGACGATATTAATGAAGAAGTTGCAACATGTCAATTATGTGTGCGGCCACGTCAATGAG  
ATGGACCAAAATACCTATTAGAAGTATCAAAACCAACAAAACAATCTAGGGGGACTAATAAAAAAGTTGTGAA  
AAGGACTATAAACATATTTAAGCCCATTTTCATTAATCTTTTCCATTATTCTAGAATGGCCATAAATCATTAA  
TTTTATGCCACTTAAAAATCTTGAAAGGAACTTTATGTGATAAATGATTGTTTGTCTGTGATAATGACAATATC  
TAATGCAGATAGCATTATACACAATCAATACATGGGCTAAGACAGTGATTGAGAATGTTTGGTCACTGATTGG  
AAGGACAGCACCACCTGATTTTCTGGCCAAGTTAACTTACCTTATATGGAACCATCATGAGCAGATTAAGCAC  
ATAGATACTGTTAGAGCATAACCTTTGGTGCACATTACTTTGTGGAAGTTGACATTGTGTTACCAGAAGACA  
TGCTTCTCCACCAAGCACACAACATTTGGTGAGACACTCCAAGAGAAGCTGGAGCAACTTCCAGAAGTTGAAAG  
GGCTTTTGTGCACATTGATTTTGAGTTCACTCACAGACCAGAGCATAAGACCATGGTATGA  
ATGGGCACTGAACTTAGAACTGATTCCTCTGATTACAGGACAGAGCTTCTTTCCCAACAATAGCTGCAGAGA  
ATGTGTCCATGGCAAGGCAACCTTCATGGAGGATCAACATGGATGAACATCGTTTGCCAGAAAGGCAATGGA  
GTCTCATTTTGGCTTTGGATTCTTCTAAGGACACTAAGTATATATCAATTGAGCACTTTTTTTTCCCATTT  
ATTGTTTCCAACTTTCTCTCTATAATTTTTTTTTTGCTAATATAAAGTTTGCATCTTTAATTGTTTCTCAGAG  
AGACAAAGGAACTTGACAGTATTACAAGAGACAAGAAGGGCTTCTTAAAGGGTATCAAGAAGTGGAAGTCTGT  
ATCATGATCTGGGCATGTTACCAGGAAATTTAACAGAGGTTTTGAAAAGATTAATCACTCATTTATTTCTTA  
ATATTATTATTATTATTATTGTTTTAAGTGGCATCTTTGATGCAAACATGAATGGGAAAATTTTGATTTTCAG  
GATGAGATGAAGGAGCTTGAAAGGAATGAGAAGGTGGCAATTTATGCATCTAACATAGGGAACATGGTGCTGT  
TTGTAGCAAAAGTGATGCTTCCATTCAAGTAGATCACTGGCTGTAATTGCATCAACTTTTGACTCACTCTT  
GGATCTCTTGTGAGGATTTTACTTTGGTTCACTGCTTATGCTATGAGCAAAACCAATCATTATCAATATCCA  
ATTGGCAAGAACCGGATGCAACCTGTGGTAATGACTTATTTGAATCTAAGATTCCTCAGTAAATTTAGGAATT  
GAGACATAATTGAATTTCCAATTATTTTATATTTATGTTGAAGATTTCAATCATTTTTTTTTTCTTTTATT  
TTGTGTGTGCCAATTGTTCTCACAGGGGATAGTTGTATTGCGCATCAGTCATGGCAACTCTCGGATTACAAATA  
TTGTTTGAATCAGCCAGGAAATCATCACAAGGTATAGATGTAAAGCATATCTTACACCCTCAATAGAAAAA  
AAGAAGAAAACCTAAATACATTATTAATCTTTAAAAATATCATGATTTTTTAATCTTAGTATATGAAATTTTTT  
TATTTAATTACTATAAAGGACTATAATAACCACATTTTTTTTATAATACTAAACTAAAATCTGTGATATTT  
TCATAGGCCAACAACTTATTTAAATAAACAAAATTAGCATAGCATTTTGTGATAGATTGTCTATATATAAATT  
ACATGTACTAATTAATGTATGCTTCATTTATTGACAGGCTCAACCTGAGAGGGATCCAGTGAAAGAAAAGTGG  
ATGATAGGGATAATGGTGACTGCAACTTTGGTAAAAGTAGTGCTAATGACTTATTGTCGAGGTTCAAGAATG  
AAATAGTGAGGGCCTATGCTCAGGACCATTTCTTTGATGTCATAACAAATTCATTTGGTTTAGCCACTGCAGT  
TCTAGCCATCAAATTTACTGGTGGCTTGATCCTGTTGGGGCCATCCTGGTATGTCCTTTTTTAAACAATTTCT  
ATTAATTAATATACTCTCAAAGCTTTAACTATATTGTATTTTATACCTTTCCCATTTTATAGATGACATTGACC  
ATCATAAGAAATTCAGAGAACTATATTAACAAGAATGTTATGTGGTGTTAGTTGTATATATTGAAAGAGAT  
TTGTTTGAATAAAAAGGGTGGATAAGTATGTTTTTAGATTAAATATGATAAAATTTGGTTTGAAGTTTTTCA  
TTTTTTATTAAATTTTGATTTTTCATGTTTTAAATTTTTTAAAAATAACCTCTATCATCACTTTGTGTTAACAT

*CrMTP11*

GGTATGTATATCTTGATATGCTACATCAATAACCATTTTAAATGATAAAGGGTATGATGTTGGGTGCATAAC  
ATATTTTATAGTATCAAATGATATAGATTGGTTTTAAAAATTTAAAAATTTGTGAGAATTAAAACTAATAAAACA  
ATATTTAGAAGACTAAAACCAAATTTTATTATATCTATAAGAATTAAAAATATATTTTATCATATATCATTTA  
ATTTTAGAAGGATTAGTATGTGTAATTTGTCTTGATATTTCTATAGTACATAACTTTTTTTTTTAAGATCTA  
TTTTGCAAATAATAATGCAAAGTAGTATATGTAATAACTGGAATAATTATATATGCAGATAGCTTTATATACA  
ATCAGTAACTGGGCAAAACAGTGATGGAGAATGTATGGTCATTGATTGGTAAAACAGCCCCACCAGAGTACC  
TTGCAAAGCTAACATACCTTTGTTGGAACCATCACAAAGGAGATCAAGCACATTGATACAGTGAGAGCCTACAC  
ATTTGGGTCCAATTACTTTGTGGAGGTAGACATTGTGGTTTCAGAAGAAATGTCACCTTAATGAAGCACATGAC  
ATTGGAGAGACACTTCAAGATAAGCTTGAAAACTCCCTGAAATTGAGAGAGCTTTTGTTCACATTGATTTGA  
ATACCACTCATAAGCTGGAGCACAAGTCAAATTAA  
ATGTTGGAGCCGGTGGAGCTTCGTAGCGAGGAGCAGCGCTCGTTGCTTTTAGATTCCAACAATGGTGACCGGT  
CTTGGCGGTTGAACTTCGACGGATTTTCAGATATCTTCGGAGCACACAGAGAAGCAAGTGAACCCCTCGTGG  
CCTCCATGACTGCTATGGGGTTCTAGGTAACACTACAATAACGTATTCATTCCATTTATTTAATTATTTTATAG  
TGTTATTATTTATTTTGGAACTCGCTTTTTTATTTTGGAGTTGACAAAGAATTTCTTGATTTTTCTTGGGAA  
TGAGAATCTGCAATTTGCTTTACATCAGTGGTTGAGGTTGATCGTGAGTTATGTGCTGCTAGATTATTTTTTT  
TTTCTGTTCTTGTTGATTTGTTGTTCCCTTTTCTTTCTTTATATGTATATGTATTCCTTTTGAATAATGTTTT  
TATTTTCTTAAAGATGCTATTGCTGGACTTCGTTCAATGTGAGTGCGCCATGTTTTGTTCTTTTTCTGCCAG  
GTTTAGTAACACGTGTTGGATTTTGAAGCAGGGAAGAGATAGAATGTTTGTCTTTTGAAGATTGGGATTT  
TTTGGGTTGATGATATGGATGGCTTTGTTATTATATGTTGAAGTTGAAGTGGGCTTTTCATGTATTGGACATT  
TCTTGCTTTCTGGGGCAGTTGGAAGATACGAAGTTTGGGTTATGCTTTGTTGTTTTCTGGTTTATGGAGCT  
TTTTTCGTAATTTATCATTTTGTCTCTAGAACTGTGAAGAGCTGATTCAAAAAATATCATTTTATTAACGGTA  
TTCAAAAACCATGGAAGTGTTTACGGCTTAACTGTGATATTAATAATATCATTTTATTCATTGGGAATCTCTG  
TCCTGTTTTCTTTTTCAAGGTGGTTTTCTATGTTTCTGAAAGGTATTCTTTGAGGGATGTCATCTTTGCTAC  
TAAATTGGAAGGGGATTTTGTGGATCATGTCTAAATTTTCTGTTTCTTGTGTACGTTTTTTATTTTTCAGG  
TCAAGAAGATAATATTGCCGAGTACTATCAGCAGCAGGTTGAAGTGCTTGAGGGCTTTAATGAAATGGATGTC  
TTAGCTGAACGCGGTTTTGTTCTGGAATGTCAAAGGTTTCTATTTTCATTTTCTCCTTTATGCTCTCTAGATT  
TAAGATCGATATATGGTCAAATGCATTGGCTGAATATCCACTGTTGTGGGCAGGAGGAGCGAGACAAATTGGC  
GAGAAATGAGACATTTGCCATCAGATTGTCAAACGTAGCAAACATGGTTCTGTTTGTGTCGCAAGTTTATGCA  
TCAGTCCGAAGTGGTTCCCTAGCCATCATTTGCATCCACCTTAGACTCGCTTCTTGACCTCCTTTCTGGATTCA  
TCCTCTGGTTCACTGCAATTTCCATGCAACACCAACCCATATCAATACCCTATTGGAAAGAACCGGATGCA  
ACCATTGGTCAGTCTCTTAATTAATGTTGTATTTGAAATTTTCTGAATCATCATCTTCTGTTCTTGGCAGGA  
TTATGGCCTCAGTGACTCTTAGAAGTTGTGTTGTTAATCAAATTAAATATAAAGAAAGAAACTACCAGCCTA  
CAATTTGGCCGAATACACATATGTTCCATGGATAAAGTATAAAATGAAAAATCGTTTTTAAGTAGTCAATGGC  
CTTGTGGATAATTATGACTACATCTTGGTGCTGAAATTTATAGTCAATTTTGGTGCAGGGAATCCTTGTTTT  
TGCCTCTGTCATGGCAACACTGGGACTGCAAATAATTTGGAGTCTATCCGCACATTAATATCCTCTGTAAGT  
TAATTTTGTGTACTTCTGGAAGCAAAATTTTCATTTAGTTACTGGATCTCTAAATATCTAGGCAGCTCTAA  
TGATATCTTGTGATGACATTTCCAGGATAATGCATTAGCTTGACCAGGAGCAAGAGCAATGGGTTGTGGGTA  
TCATGCTTTCAGTGACTTTGGTGAAATCTTGCTAATGATTTATTGCCGCTCTTTTACAAATGAGATTATTAA  
GGCCTATGCCAGGATCACTTTTTTGATGTGTATAACTAATGTCATTGGCCTTATTGCTGCACTTTTGGCAAAT  
TATTTTGATGATTGGATGGATCCTGTTGGTGCTATCATTGTAAGTGAATACTTTCCTTATGTTAAAGGTTTTG  
ATTATATTTATGTTAACAATTGATAAATCTGATTTCATGCCTGGGGATGAGGTAAAGCACTGTAGTATACAAAT  
AGTATTTCCAGTAATCTCATCCATCAACAACCATAGCCATATGAGTGTCTCAGCCTCTGCTATGCTCCTATAT  
TTAAAAAAATAAAATCAAGATGTCAGATTCCTTAAGATGGAATTTCTCATTCAGAAGAGAACCTATCTAAT

*CrMTP12*

TAGCTTATCATAATTTCTACAATCTCTCGAATTCTATGCATATTATGATGATGCACGGCTTTTATACTCAATT  
CTGGACTACTACGATTTTAGGGAATCACGGGGTTCCTTTGAGCATAATGTTTGTCTGGAACAATTTCTTAT  
TACTATTGTATACCTAAGTGTACATAGCTGGTCACTATAATTTGTACTTGCTTTACTGACATGTAATTCT  
TCTACTGCAGCTGGCTTTGTACACTATTTCGCACATGGTCCATGACAGTGTGGAAAAATGTGAATTCAGTGGT  
GGAAGATCAGCTGCTCCGAGTATCTTCAGAACTTACATACTTATGCTGGAACCACCACAAGGCCATAAGGC  
ACATTGATACTGTTCCGGCATAACATTTGGGTCTCACTACTTTGTTGAGGTTGATATTGTCCTGCCAGCTGA  
TATGCCTTTGCAAGAGGCTCATGATATTGGCGAATCATTGCAAGAGAAGCTTGAGCTTTTGCCCGAGATTGAG  
CGTGCTTTTGTTCATCTTGATTATGAGTTCAGTCATAAACCTGAGCATGCTCAAGCACACTCCTAG  
ATGGCCGATCAGCCTCACCACCACCACCATCGACCGCACCGCCTCTCCGTGCCACCGCGCACCGCCACTTTGG  
CGACCACCCCGAGACCCTATCCACAGTTCGATACTCAACATCAGCATCAACACCCACTGCAACCCCGTCCAA  
ACACCGTCGTCTTTCTTCTCTTATCCTTCTCTAATTCCAAATCCAAATCCAAATCTTCACTCTCATCGCTT  
TTCCTCCTTCTCTTCTCTCTTCGCTCTCTCTATTCTCTCCTTCCCTTCTCTCGCTCTTCCCTTCTTTTCTC  
TATTCCTTTTCACTTTTCTCGTTTCCCTTCTCTCCTTCTTCCCTTACCCTCTCTTTTCACTATTCTCTTCATC  
TTCTTCTCCAAAGATCCTTTTCAACAGCACAAACCTAAGCAGTCTCTTCTAACGGTCACACACTCTCAGCAG  
AGGATCCTGGTTGCTAAATCAATTGTTCTGGCGCTTGTTTTCTCCTTCGGTTCCAAGCTCTCCGCTACTGTG  
GCACCGCTCAATGATCCTTGCCGAGTTGATGGGAAGCATAGCTGCTCAACCTAAAAGTCAGAACCGGACTAA  
GGTTCGTGGGTTGCTGCTCTGTTTCTAGGATTGTTTATGTTGCTTTTGGTTGGGATCGAATTGAATGTTTT  
CCCGTTTGGGGATATGCGAAATGTGTGAGGGTTTGGCCCTTGTTGCTTCCTTTTATGTCTGGATTCTGGCTT  
GTTATGAACGTGTTTCCATCATGAATTGGGGAACGATTAAGCAGCTTGCTCATAAACGGGTTGCGCTAATTAC  
CCTGTTTTTCACTACTATTGTGCTATTGTTCCTGCTGTGATTAGTTTTTTCGTGCTTGAATCTGAAGAAGAT  
AGTGTTCATTTGGAATTTGGTGTGGCCTCTGGCCAATACTGTTGTTTTCGGTGTGCTTTTGTAGTGAGAATT  
ACAGCGATGATTATGTGATGAGTTTCAAAGACTCTAAGAGGGAGTTTTTGGTCACTTTTGTCTGCACTATGGT  
ATTGGAACTTTTCTATTACCTGAACCTTCCCTTTGGGGTTTGTGCTTTGTGGTATATTGCTCTATTTTGGC  
GTTAGAGACTTGGATCCTTTCCATTCCAATGAGTTTGGCTCGGGAGAGGAATTATTTAGTGACATGATTATGA  
GGCCTATTAGACATGTTTTGGGTGAGAGGAAGTCCCGGAAAATTGCACTGTTTCTTTTATGATCAACACTGGCTA  
TATGGTTGTGGAATTCGCTGTTGGATTTATGAGCAATAGTCTTGGGCTGATATCTGATGCATGCCACATGTTG  
TTTGATTGTGCTGCTTTGGCCATTGGGCTGTATGCTTCATATATATCCCGTTTGCCTGCAATAATCACTATA  
ACTATGGAAGAGGAAGATTTGAGGTTCTATCAGGATATGTTAATGCTGTTTTTCTGGTTCTGTGGGTGCACT  
GATAGTGGTGGAGTCTTTGAGAGGATATTGGATCCTCAAGAAATATCTACTAGTAGTTTGTAGTCGTCTCT  
ATAGGAGGGCTTGTTGTCAATGTCAATTGGCTTGATATTCTTTCACGATGAGCATCATCATGCCATGGATTGT  
CTGGATCATGCTCACATTCTCACGCACACACAGAGTTCATAGTCAACACTCCCACCATCATCATGATCTGCA  
ATGCCACAGTAAACATCATCATGATGAAAGACATGGAAGCAATCAAGAATTTATTTCTGTTTCCAGTGATTGC  
CAAGATAATTATGCTCTGGTGATCCTGGTCAATCACAACCCTCTAGTCATGGGAGGAAAGCTGAGTTTCATG  
CAGACAATCACTGCAGTAAGAGTTTACGCATGATCATGCCAGCTGCATGATTGTGATGAACACTGCAGTCA  
TGAGAGGATGGTTGAGTGTATGTAGACAATCACAGCATTAAGAGCATTGAACATCATGGCCATCAGGACCAT  
CATCATGGCCATCAGGACCATCATCACCATCATGGCCATCAAGACCATCATCACCATCATGGCCATCAGGACC  
ATCATCACCATCATGGCCATCATGACCACCATGATCATGCCAGCATCATGAATATCATGATCTTCAAAAGC  
TCCACTTGTTTCAACAAAAGCACAACCATCGCCATATCGATCACAATATGGAAGGGATATTCTGTCATGTTCTT  
GCTGACACGATGGGAGTGTGGTGTGTTATATCTACACTATTAATTAAGTACAAGGGATGGCTTGTTGCTG  
ATCCTGCCTGCTCAATTTTTATTTCAATTTTAATTGTATCCTCCGTGATACCTTTACTCAGAAATTCAGCCGA  
AATTTTGTCTCAAAGAGTTCCAAGGTGCATGAGCATGAGCTGAAAGATGCTTAACTGATGTTTTGAAGATA  
AGAGGCGTTTATGGTATTCAAAAGTTTCATTTATGGAACCTCACAAACACAGATGTGGTTAGTACACTGCATC  
TTCATGTGTCAACAGATACTGACAAGACATCCGCGAAGTCCAGGTTTTGCATCTGTTACATAGTGTGGAAT



|                   |                                                                                                                                                                                                                                                                                                                                                                                                                                                                                                                                                                                                                                                                                                                                                                                                                                                                                                                                                                                                                                                                                                                                                                                                                                                                                                                                                                                                                                                                                                                                                                                                                                                                                                                                                                                                                                                                                                                                                                                                                                                                                                                                                                                                                                                                                                                                                                                                                                                                                                                                                                                                                                                                                                                                                                                                                                                                                                                                                                                                                                                                                                                                                                                                                                                                |
|-------------------|----------------------------------------------------------------------------------------------------------------------------------------------------------------------------------------------------------------------------------------------------------------------------------------------------------------------------------------------------------------------------------------------------------------------------------------------------------------------------------------------------------------------------------------------------------------------------------------------------------------------------------------------------------------------------------------------------------------------------------------------------------------------------------------------------------------------------------------------------------------------------------------------------------------------------------------------------------------------------------------------------------------------------------------------------------------------------------------------------------------------------------------------------------------------------------------------------------------------------------------------------------------------------------------------------------------------------------------------------------------------------------------------------------------------------------------------------------------------------------------------------------------------------------------------------------------------------------------------------------------------------------------------------------------------------------------------------------------------------------------------------------------------------------------------------------------------------------------------------------------------------------------------------------------------------------------------------------------------------------------------------------------------------------------------------------------------------------------------------------------------------------------------------------------------------------------------------------------------------------------------------------------------------------------------------------------------------------------------------------------------------------------------------------------------------------------------------------------------------------------------------------------------------------------------------------------------------------------------------------------------------------------------------------------------------------------------------------------------------------------------------------------------------------------------------------------------------------------------------------------------------------------------------------------------------------------------------------------------------------------------------------------------------------------------------------------------------------------------------------------------------------------------------------------------------------------------------------------------------------------------------------------|
|                   | CAAGGATTTAACCTTGCAAGTGAATCTGTTGGATAA                                                                                                                                                                                                                                                                                                                                                                                                                                                                                                                                                                                                                                                                                                                                                                                                                                                                                                                                                                                                                                                                                                                                                                                                                                                                                                                                                                                                                                                                                                                                                                                                                                                                                                                                                                                                                                                                                                                                                                                                                                                                                                                                                                                                                                                                                                                                                                                                                                                                                                                                                                                                                                                                                                                                                                                                                                                                                                                                                                                                                                                                                                                                                                                                                           |
|                   | <b>Promoter region (ATG upstream 2000 bp, 5' to 3')</b>                                                                                                                                                                                                                                                                                                                                                                                                                                                                                                                                                                                                                                                                                                                                                                                                                                                                                                                                                                                                                                                                                                                                                                                                                                                                                                                                                                                                                                                                                                                                                                                                                                                                                                                                                                                                                                                                                                                                                                                                                                                                                                                                                                                                                                                                                                                                                                                                                                                                                                                                                                                                                                                                                                                                                                                                                                                                                                                                                                                                                                                                                                                                                                                                        |
| <i>CrMTP1-Pro</i> | <p> ATAGGATATTTTATTAAAGTGGTGTGTTGATTTTAAAAAATGTTTATTGTTTTATTGTTTTATTTTATTTT<br/> TATTATGTTGTATAGAAAAATAAAAAAATATTATTTTAAATACAAAATTTTAAAAATATAAAATAAAATAA<br/> AAATAAGATGATATTTTATATAAATAAAAAATAAAAATAAAAAGCAGAAAAATTTTCTGAAAGTAA<br/> TAAGATTTAACTTTTCTTGATGATTTAATTTATTTCTTTTACTTCTTAATATATATAGTCTCATAATTCA<br/> TTAATTTGTTGTCTAATATTTTTTATTATTTATTTTCTATTAAATTGTTGATGTTGACATCTTTTGAAGCTA<br/> GAAATATCTGAAGTATAATTTTACAACTAAATTGTATAATTATTCAATGAAGTAATTAAAATTATATGTAC<br/> AAATATATATATATACACTTATTTTTTTTATATTTTGTCTGTTTATAGAAGTTATTAGTTTGTATCTTTAT<br/> CATTAATAATTATCTTACTTTTAGAAGGTGTTTGGTATATGTACTTTTTTTTCATTCTTAAAAATTATGTTTT<br/> CGTAAAAATTGTAATATATTTGATAAAGTTGAAAAATTCACAAAAATGGTAAATGAGTATAGTTAAAAATTTT<br/> CTATTTTATAGAAGGATATAGGATTGTCATTCTTTGTATGAGAATGTTTATAGTAAAGACTATAGTTAAAGTCA<br/> TTGTTACGAATTTGAGTGTTCAGGGATATTTTTTAAAAAAAACATTCACTATACATAGCAAGCTAATGTC<br/> CTCGAATTAAAAATCTTGAAAAATTGAAACGAATCCTTCTAATGAATATCTTCCAGTCTAAAAATGTTAG<br/> TGCCCAACAATTCATTCTGAAATTTGTTTCATTTTAAATTTTGGAAAAATTATTTAATCTCAAAATATATTTT<br/> TATACATTTTGATTTATGATTTTACTAATTTATTTTTATTTTATCTATATATCTTCACAAATTTACAAGAA<br/> AAGCATCATAATATAATTAATTAATATCAAAATGGTTATATTGATATCTATTAAATTAATAATTTTAAAT<br/> TTTAGTTTAAATTCATTATTTTAAATAAATTTATTTTGGTTTCTCATTTTCAAACCAAACTACAGTTACTTCC<br/> TCATCATTCCTTATCATTAATGTGTTGAGCATTAAATATTCATCTATCAACCATTAGTTACTCAATAAAAT<br/> AAAAATAATTTATTTTTAAAAATAAGATTAAATCAATCATTTAAAAAAAATATTAAATTTTAAAAATACTA<br/> AAAAATATATTTAACTCAAAGTAAAAGTATAGAATACAACCTTTACTAACTGAATTGTATATTTACTCAATCAA<br/> ATAATCAATATCATTATTTAATAGAAATCTTTAATAGCAAGAATTAAATAAATAATTTTGTAAACTAAAAA<br/> GTAAATCATAAAAAATTGATAAAAAATAAAAAATTATTAATTTAAAAATAAATAAATAAATAATTAATTAATTA<br/> AGTCATGATTTCATGATAGACACGTGAGGCTCCCAACAAAAAATAGAAGAAGCGCCATCTACATGCATGATT<br/> GAGAGAATCTTCTTTGGTAAGAAAGAATATTCGTTTTTCTATTTTTTAAAGTATTAAAAGCAATATTCTTA<br/> AAAAAATTACACAATTATACAATGTAGATATATATAAAGTTAATTGTGCAAGGTATCCGTTTATTAAGGGC<br/> AGTTTTATTTGTAGAATTTTATTTTATGTTTGGCTGAGTCAAATCTCCGAATCAGGAGATTATAATAAACG<br/> AGAAACATGGAATAATTTTTTTGTTTCTATAAAAGAATTTTGATCTGAATGTATTTAATAAAAAATAAGCTT<br/> AGATTTTAAATAAATTTATATTTAACATTTAATAATACGAATAACAACAAAAATGTACACAGAAAAAAAAG<br/> GAACAAAAATATGAATAAATGTTTCTGAA<br/> CATTCCTTTAAATTTATAAATTATTTTAAATTTGTTATACATTATTTATTATTGTAGTTATTTAAAAATTTAC<br/> TTTTTTTAAATTTTACAAAGTAAAAAATGATATCAATTATATTTTTTTATTTAATATAATTTTTTTATTTTGT<br/> TTGAAATGTTTTATTATTAGAACCATTTTAAAGTATTTATAATTTTATTTTATTTTATTTTAAATTT<br/> AAAATTTACAGTTAATTGTTTAAATAATAAATTTTATATTTAAACTAACCCTTGCTCCTATAAAATTT<br/> TATATGTAAACTTTTAAATTCAAAGATTTTTTAATTCATGAATCTTTTGAATTCGAATCCATAAAATTAA<br/> AATTAATAAATTTAAATTAACCTATTTAACAGTTCTACTTCCATAAAAAAATACTAACTACCCAGATAAAA<br/> AAGAGATACGCTTATAGAATCTCTTTCAAGAAATTTGAACGGTTGCAAGAATCTTGTCGTGCATATTTCTTC<br/> ATATGGCCTATAATGGTAAGATTATCAAAGCACTAGTTTTCCCTTTCGAAAGACCACTTTTATTATCCAACGT<br/> ACGAGAAATTAAATTAAGTAATAACATGTGATATAATAATTAATGGTGATTTCAGATCAAATTCAGTGTCAA<br/> ATCTTCATCAATCCCAGCCCAATAAACCAAAAAGTTAGAGCTATCTAGTTTCGAGTAATCTGGTAAAAACGAA<br/> ATGTAACCTTGATCCTAATCAATATATGCATTCTCAAATCTAATAAATCCTAACAATTGTATCATTTTATTTT<br/> TACTATTGTGGTGATGCGTATGTCTATCGGGAATATATTGAATTTGTGTTTATTAACATATAAATATAAT<br/> TTATTATTAAATTTTGATTGCAAGATTTTAAATATATATATATATATATATATATATATATATATATATATAT </p> |
| <i>CrMTP4-Pro</i> | <p> AAGAGATACGCTTATAGAATCTCTTTCAAGAAATTTGAACGGTTGCAAGAATCTTGTCGTGCATATTTCTTC<br/> ATATGGCCTATAATGGTAAGATTATCAAAGCACTAGTTTTCCCTTTCGAAAGACCACTTTTATTATCCAACGT<br/> ACGAGAAATTAAATTAAGTAATAACATGTGATATAATAATTAATGGTGATTTCAGATCAAATTCAGTGTCAA<br/> ATCTTCATCAATCCCAGCCCAATAAACCAAAAAGTTAGAGCTATCTAGTTTCGAGTAATCTGGTAAAAACGAA<br/> ATGTAACCTTGATCCTAATCAATATATGCATTCTCAAATCTAATAAATCCTAACAATTGTATCATTTTATTTT<br/> TACTATTGTGGTGATGCGTATGTCTATCGGGAATATATTGAATTTGTGTTTATTAACATATAAATATAAT<br/> TTATTATTAAATTTTGATTGCAAGATTTTAAATATATATATATATATATATATATATATATATATATATATAT </p>                                                                                                                                                                                                                                                                                                                                                                                                                                                                                                                                                                                                                                                                                                                                                                                                                                                                                                                                                                                                                                                                                                                                                                                                                                                                                                                                                                                                                                                                                                                                                                                                                                                                                                                                                                                                                                                                                                                                                                                                                                                                                                                                                                                                                                                                                                                                                                                                                                                                                                                                                                                                                                                                                        |

ATTTTTTAACATATATATTTTAAATTGATTTTTAAAGGCTAATTAATTATGAAATAATTTTTAATTTTT  
 AAAAAATAATTAATTATAAAAATATATTGAAGAGTATATTGTTCTGTCATTATTTTGAGTATATAGTACGATCT  
 TTTATTATACATTATGGTGTATTCTTCTATACACATTTTAAAAAAAATTCAATAATTAAATTTAGAATTTAA  
 CTTTGATCTAATTCAATTCAAATTAAATAAACATACAAACATCTTTGTTAATTCATGTGATATTAGATGAAAA  
 CTTATAACAACTCAATTTAACCATAATCTAATTTAATTGATTTATATTTTTTCCAAACCTGATCTATCTTAA  
 TTCAATTTAACCTTTATCAAATTCGATTGATTTAATTTTTTTTAAACCCGGTCTATCTTTACTTTCTGTTCAI  
 TTTTTTAATCATTAGTATGTATCTGTATGTTAGTCTTTTTTAAATTAATAAAAAATTAAATTTATTTGACT  
 AAGATTATAATTATTTTAAATTTAGTTTTATCTAAAAAAGATATATTCAAATTTGTTATAGTACACCGATA  
 TTAAATATGTAAATTAAATTATTAATTACAAGAAATAAATATTATAAATAAAAAATTAAATGCTTAATATAAA  
 ATAAATGACATGATTTAATAAGAATATAAATAGTTTCTAAAAATATTTCAATTTAACATAGAAAGATAAATTA  
 CTATTTGTATTTCATAGATATATGACATTCAACGATACGTTTTTTATTTATTGTAAGTAAGGAATCAATAGTTC  
 TAAGTTTTTGTGTATTTTATATGAATTAATTAAGTTAAATTATTAGGTTTTATAAAATAAATAAAAAATTA  
 ATTTAAATATACTCGTAATAAACTGATCATGAATTAATATATATTTAAATTTATTAACTTTTATAATAATTATT  
 TAATTGATTGAAAAATAATTTTTTAATCATGCATCAAAATTAATTTAATAAATAAATAAAAAATAAATAGT  
 GTGGAATACTCGTGTGGTAGTGAGGTAGTA  
 TGATAGGAAAACAGGTTGATGAAGCAATGCCGAATAAAATAGAAACAAAATTTTCATTATTTTTTAACCTCAA  
 AATAAAATAAATTAGATAAGAATTATTTTTTTGAAATTTGAAATGAAAAATGAACCCATCTCATCTGTGTGATT  
 CTCTAGATTTTTAATGAGAATTTCTATTCCCTCAATATTTTATATCGTTTTATATATTTGAGTGAGAAATAAA  
 AAAAGGATAAAGATTAAATGATGTAATAAAGAAATAGAAAAAATAAATTATTAATAAATGTTATAAACTTTTGT  
 TGTAAGAATAACATAATCTTTTTGAATGAACCATAATTATTTAAGCTATTGAACTATTTAAATAAATTTTCT  
 AATCATGTACCTATATATTGGATAAGAGTATTGCATCGTCTTTCTTTTACGATAACACTAAATGCATAA  
 ATTTAAATCTAATTATACGTCTTTTAATTAACCTCATTTATTTAAGAAGGATAATTATATACAATTAAAATTTT  
 GTGAGATTCTCTCTCTCTCTTTTGTGTATGTTTCACCTTTAAAGTAAATAAATTAATAAATTTTTTTTTTAA  
 AAATTGAGATGCTTATAAAAAATGAACCCACCTAATTATGTTGGTTTTCTAGTTTTTTGAGGAGGAATTTTCT  
 TTTCTACTTAATATTTTATAACATTCTATATATTTAAGTATGAGATAAAAAAGAAATAAAAAATGAATGA  
 TACAATAAAAAATATAAAAAATGATAAAAAATGTTATAAAATTTATTATAGAAATATATAATTATTTTTAAATG  
 AGGCATATTATTTAATTTATTCAACTAAATATTCAAAAATAATTTGTTAATGTATGTACCTATGTATTGGAT  
 AAACATATTAAATGTATAAATTTCTTTTAAGGTAATATTAAATGCATAAATTTAAACCTAATTATTCGTATTT  
 TAATTAATCATTTGTTTTTAAAAAGATAGCTATGTATAAAAAATTAAGATTTTTGTGAAATACTCCATCTCTT  
 TCCTTAATATATTTTGTCAATTTTCAAATAATTTTATTTTCAATTTATAAGTATGAGAAAAATAATAA  
 AGAGATAATATTTTAAAAATCTTAACCTACCTCTATATAAAATTAATAATTTTATTTTAAAAAAATTTAGAA  
 AATTAATTTTTCATATTAAATTATACAAAATTTTATATATTTTTTAATTTTAGTTTTTTAAATACTAATTTAA  
 TTTAAATTTTGCATATCAATATTATTTGAATGTGTATTAATTTTTTTTATCATGAGGTATAGTCCCCCTCCCC  
 TCCCCACACCCCATCTATACATCCAAGTCTAAAAATCTTAATTTATTTTTTTTGAAGTGGAAGAGTCTTAAT  
 TTATTTTCATTCTAGCATATTCTATATTGAACCCCTATGTCTTTAAAGCAGTTTGGAACCTTTTGAAATTAC  
 AAGAAAAGTAGTTGATGAAGTCATATAGGAATAAAATAACAAAACCTTAATTTTTTTTTTAACCTTATACTAA  
 ATAAATTAGATACAAATCGGTTGTTTGAATTTTGAGATTGTTATACAAAATGAACCTGACCTCATTCGGTTGGT  
 TTTCTAGTTTTCTAATGAGGATTCTTTCCCTACTTAATTTTATAACATTCTGTACATTTAAGTGGGAGATAA  
 AAAAGAAAAATAAATGAATGATATAATAGAAAATTTATATGGTTAGTTATTTTAAAAATTAATTAGTTGAAA  
 TTCTTCATTGACTTGTAATAAATTTAAATTTGTTTAAAAATTTATTTAATCATAAATTTGTGATATTATT  
 AAAATACTAATATTATAATAATTACATTACAAATTCACCTATTACGATTTTAAATTAATTAATAATATAA  
 TTTTGTGTACATCGATAAAATTAATTAAGAGATATTTAGATGAGGTTAATTTGTGTATTTATCAGGCTAGT  
 CCATAGCTAGTTAGAACTTAGAAAAATCG

*CrMTP6-Pro*

TTTTAATTATATATATATATATATCTTTATTTACTTAACTTACAAGATTAAATATTGTTGCATAAAAAATTA  
TTAAACAAGTATTTGAAAAATTTATTTAATAAATATGTCAAAGAACAATTCATGCCTTTAGTGTTCATGGT  
TCGAAATGTATAAAAAAGAAACATTCCTTAAACACTTGGTATATAGGATATGTAAATGTATTCTACAACACTT  
CATTTATCCATACAAACAAACCAAAATCATTAGCAAATAAACATAATTTTCTTATGAAAAATAAAATCATATT  
AAAAAAATTTAAAAATTTTCCATCATCACTCAAAAAAAATGCTAAACATATTGTATTAGAGCATAATTA  
CATAGAACAACCTTAAAAAAATATGTTATGTAAATAATATTATATATTAAATAGAGATAAAAAATATTAA  
AAATTTAATCCATCTTAAATGATTATTTTTGTTCATTTTATATAAAGAAAAATTTGTTAAAAAATATAAGA  
ATTTTTTTTTAATCATTACATCAAAATTAATTTTCAACTTTTTGTTCTTCAATTTTTCTTATATTGAATA  
TTCTGTTTAGTGTATATGTAAAAATAATAATTTTTTTTTATCATTATTCATCTTTAATAACAATTTTTTT  
TTTTACATTTACTTAACTTTAAGTTGAAGATACTTGTTCAACTACTATTAAATTTAAGTTTAGAGAACTTT  
GTACTTAAATATTTAGTTAGTTGTATTTGTTATATAAAAAATATTTTAGTACAATTTGTTAGATTTAATTGGG  
ATTAATATATCTCTCAATTGTTGAAAAATGAATTATTAATATGATGTTTAAATTTCTGTTCTTACATCTCT  
CATTTTTTAATTAACATAGATTAATTGTAATATTTATTTTTATTTTATTATTTTAGTAAACATTTTATATGTT  
TCTTGTATTATTTTAAACATGGATTGGTTTAAATTTAAATAGTCATATGAGATAAATGATTTGATTCAATTT  
ATATTTTTTATTACTTCAAATTAACGAACTAAAGATAGATTATATGTCTCATTAAATTTAGTAAGTATTTT  
TTATTAAAAATCTAAATAATTAATTATTTTGACTCAATATCTCTCTAATCAAAATCATATAATATTGCACAT  
ATAAAAAATAAAAAATAGAATAAAATATATATTTGTCAAATGATTATTTTAAATAGCCATTATTTAACTAAC  
ATAATTAGGTATTTACATGTTAGTTAGAAATAGAGGTTTACTTGTGTTGAAAAATCCCAAATCAATACTCAAA  
CTAAATTTGACTAAATTTTTATTGATTTGTTTTGATTTCAAATAAACATATAAAATCAACTGAATTGGTTGCG  
CTTCATAAAAAATCAATAACATCCCTAACAAAGTTATAAAAACTTAAACATATCGCCATTTTTTTGTAACAACAC  
GTGCCAGCATTTGATTAAATGGCTTAATGGTAGAGATATAAGAATTTTAACTGAATTATTTCTTTAATATAA  
AAATCTATCCATTTTAAAGTAATAAAAAAATGAAATTATGAGTAGACAACATGATTCAAGTTTTTAAATGCAAGT  
CAACTAAATCATTTAAATTAACATTTTCAATATTTACTTAAAAAAATGTAAGTTGGATCAAATTACTTATT  
GAAAATTGAGTCAAGTTAAATCATTTTGACGTTGTTGGTTCAAGGGTAAAAATTTATATTCATCCCCCTCTCC  
CCCTCCAATTAATGGCACATAGATATTTTTTAATAAAATAAAAAAGATTAGTATGTGTTGTATAATTTTAA  
ATAAATATGTACTGATAATTTGATTAGGAAAATTAATTATAATTA AAAAATTTGACCCGATTAGAATATTGTT  
TTTAAAAATCTTAATTCATGTTTCGGTAAGAGCAAAGATTCACCACGTGGCGCGGAGTGTTATGACTTAATG  
CGCTTTGTGACACGTGCATACCTCACACA

*CrMTP7-Pro*

ATAATAGGGAGATGTTTGGCTAATGTTTTATTATTTTTATACAAAATCTAAAAATAATAAAAGTATAAAAA  
AAGATTATATTTTTTAATAAAAAAATTATTTTTTCAAATCAAATGACACCTTAACAATACAACTACTATTGGA  
TGATCATGCAGAAATAGAAAATGAACAATAGGAACAACAATCTCAACAAGATTTAGAAAAGGACAGGATAAT  
TTCTTTTCTTTGAAATCATGTTTATCCAATGAAAAATGTTAGAATAGCTAAAATTTGTGAAGACTTTTAA  
GGATAATTTTCAGATAAATTAGGCCATTCGAGATCGTACATTGATCCTTCGCAAGTTAAGAAGAAATTACACT  
CTAAGTCATGAATAATGTTTAAATTTCAAGTATTTTACTTTAAAAAATTACATACTCCAATCGTTAGAAATT  
AATAAATTTCTCATTCTAAAGAAGCAAAATTTATTTCTTCTTATCATGTCTCACAAATAAATATTTTACCTA  
TCTAAAAAGAAGAAAGAAATGCACATGTAAGTAGGAATACACTTACCATAAGTATTAGACACTTTACTTAAGA  
TCTTCCCTATTTTAGATTTTGACACAACATGATTAAAAAGAAATTTGTTTTATAAAATTGATTTTTATTGGAC  
ATGATGTTTTTAAATGAATTGAAAAAATGATTTTATTGATAGATGAAGTAGAAGTATTTTCGAAAAATAAA  
GATACAATATAATCTATGGATCTCATATTCAAATTTATTTATTAAATAGAAAAATAAAAAATTCATTTCTT  
CTAGAATTAATTGTCTACAGCAATTGGTTCTACTAATCACTTTTTTCAAATTGATATGGGTAACATACATGTT  
TATTAAAGATATCCTCCATTAATAGCTAAAGATTAATACATACACAGTCAAAAATTGATCCTATCAGCATA  
CTTAGAAATATACTATTATCTATATACTGTGTGAGCTTTTTGATACTGTACAATTGAATTTAAAGTAAAA  
TAAATGGGTTAAAAACATACACTACCAATAAAAAATTAATAATCTTTCAAATCATTAAGGTCTATTGGGG

|               |                                                                                                                                                                                                                                                                                                                                                                                                                                                                                                                                                                                                                                                                                                                                                                                                                                                                                                                                                                                                                                                                                                                                                                                                                                                                                                                                                                                                                                                                                                                                                                                                                                                                                                                                                                                                                                                                                                                                                                                                                                                                                                                                                                                                                                                                                                                                                                                                                                                                                                                                                                                                                                                                                                                                                                                                                                                                                                                                                                                                                                                                                                                                                                                                                                                                                                                                                                                                                                                                                                               |
|---------------|---------------------------------------------------------------------------------------------------------------------------------------------------------------------------------------------------------------------------------------------------------------------------------------------------------------------------------------------------------------------------------------------------------------------------------------------------------------------------------------------------------------------------------------------------------------------------------------------------------------------------------------------------------------------------------------------------------------------------------------------------------------------------------------------------------------------------------------------------------------------------------------------------------------------------------------------------------------------------------------------------------------------------------------------------------------------------------------------------------------------------------------------------------------------------------------------------------------------------------------------------------------------------------------------------------------------------------------------------------------------------------------------------------------------------------------------------------------------------------------------------------------------------------------------------------------------------------------------------------------------------------------------------------------------------------------------------------------------------------------------------------------------------------------------------------------------------------------------------------------------------------------------------------------------------------------------------------------------------------------------------------------------------------------------------------------------------------------------------------------------------------------------------------------------------------------------------------------------------------------------------------------------------------------------------------------------------------------------------------------------------------------------------------------------------------------------------------------------------------------------------------------------------------------------------------------------------------------------------------------------------------------------------------------------------------------------------------------------------------------------------------------------------------------------------------------------------------------------------------------------------------------------------------------------------------------------------------------------------------------------------------------------------------------------------------------------------------------------------------------------------------------------------------------------------------------------------------------------------------------------------------------------------------------------------------------------------------------------------------------------------------------------------------------------------------------------------------------------------------------------------------------|
| CrMTP8-Pro    | <p>TATCATAAGTTTTTAAATGCTAATTTAAAAATAAAATATTTTTAAGTAATACGAAGTTAAATTATCTTTTTAA</p> <p>CTCGATTCTGAAACTTTAAAGAAAAATTTAAAGGAAAAATTTTAAATAAAAAATAAATTTTCAATTCTTCTATAT</p> <p>TTTAAAAATACACACATATTATAATTATTATCATTATTTTTTTCTATTATTCCATCCACTATAATTATTATA</p> <p>ATTATTAATTTATTTAGTTATTTTTTTACATATACCTTTTATATTAATCTAGTTATTATCAACAATAATAAATA</p> <p>AATAAAATTAAATTTAAAAATAAATAAAAAATTAATTATATTTTTAAATTAATATTTTTTATTTTAAATAGAT</p> <p>AAAAAATAGTAAAAAATTATTATCCCATTTATTAACATTTTCATTTTCTATTTCATTTTAAATATAATCATTATTA</p> <p>TCTATATACAATTTCATAATTATCATTATTATAAAATTTATAATTGTTATGATGATCACCATCTTTAACATTAA</p> <p>CATTAATAATTATTATTACTATTATATACAAATTATACCTTATCACAAATTTAAAAAATATGATAAATAATAATT</p> <p>TAAAGAAGAAATGATAAATAATTTATGTAATTAATTTTATAATATGTTTGATAATAAACTATTTTTAAAAAA</p> <p>TAATTACTATTTCTTTTTAAAAATCTTATAATATTAATAAATAAATGATTATTTTCATTAACAAAATACTG</p> <p>ACTTAATAATTGACATTAAAGTTGAAAAGCCGAAAATCTAAAAATAAATCTAATTTGTATTTTAATATTTT</p> <p>TAAAAAATTACAACCTGGTTCATTGAGGTTGAGACATTTGGAAGCAATTCCTTGATGATGTTGATTGGTGTGC</p> <p>AAACCTTTCTCCAAAATATTTAAAAAGAA</p> <p>GATTATATTTAGGAAGATCCTGTTTTATGTTAATCATAATTTCTAAACATTAAAAATATGTTTGATATATTT</p> <p>AAATAGTTTTTAAAGTTTTTTTTGTGAGTTTAACTAATATTTTTTTATTAATACTTAAATTATCACTCATT</p> <p>TTGTGAGAATATTTTAAATAAAAAATATAAATAAAATGCCCTTAAAAAATTAATTTATGAGAATATTTTTTAAG</p> <p>ATTCATATTTAAATTTAAAAATAAATTAAGGTTCAAAATTTAATTGAAAATTTTATTATTTTATCATATAACC</p> <p>TCTTAATTTTAAAGGAAATATATATATATATATATATATATATATATATATATATATATATATATATACATATAT</p> <p>ATACTTTTTTGGTCAGACTTCAATTTTTCTCTCCTCGAATGTAAAGAAAAATCAAAATTTAAGAAAAATAAGT</p> <p>CACTTTTTTATTTTCATCCCTTAAAGAAATTATCATAAAATCTACAATTTTAATTACATAATAATCAATAATT</p> <p>ATATGATAGCATAAAATTTTATTTTACAGTATTAATAAATTTAATCAAAATCAACATTCAATACATGGTATGA</p> <p>ATATTTATAAATAAACTTAAATATTTATAATCTCTGTAAATATACTTAATTTTTAGTGTCTATAAAAAATCTT</p> <p>TTATTTCCATCACTAACTATTTCAAATTTAGCTTTTGATGTTTGTATAACTTGTAGTTATAGATTTAATT</p> <p>AATATATGTTTGACAAAATTTTATGTCATGTAGTAATTTAGTGTATACATTAAAAAATTGCGAGAATTAATA</p> <p>TTTGAGTGAAATATTAAATAATTTTTTTACATGATTCAAGATGAAAACCAAATTTATATTTTGTATATTTTT</p> <p>TAAATATATACAATAAATTAGTAATAATTTTTTTAAAAATTTTATTAATCAAAAGAAAAATATCTAACAGTAA</p> <p>AAATTAAAAAATCTAAGATAAAAAATAAATAAAAAATTTACAATAACTAAAAAATTTTCTGTATCTATGAA</p> <p>AACTAAAAATATTTTAAATCATATCAAATATATGTGAAAGATAAAAAAATTTAAAAATTAATTTTTTAAAGAAAT</p> <p>ATTATTTATAGATAATAACAAATAAATTTAAATTCAAATATAGGAGATTAAACCTTTAACTTGGAATAATT</p> <p>AAAAATCATTTTAAAGTACTAAAAACAATTCATGATGATATATTAATCTTATTGATTAAAAATTAACATA</p> <p>ACTAAAGTTATTGAATTTTGTGATTTTTACAACATTTTAAAAAGAGGAAAAATTTATTAATTTGATATATGAG</p> <p>TTAATAAATACGCATCATTACAAATAAAAAATACACGTAATTATATAATAACAAGAATATTTTATAAACTT</p> <p>GTTTTATTTTTAAGAATGAAATATAAATTTATAATTAATATATATATATGTAATAATTGATGATTATGTGAATT</p> <p>ACTAGTATTCAAATTTTAAACATCAAATATCAATCCAGTCCACGTGATAAAAAAATTTAATTCAAAATGATT</p> <p>TATTTCAAAAAATAATGTTTTAAAAATTTAGTTTCTTTTGACGAACAATGTATAGTTTTTTATTTTAAATAAAA</p> <p>TAATGATACATTTTCATTTACAAAATTAATCATTTTAACTTCTAAATTTAGAACTTTATATTTTACTTAAA</p> <p>GTAAGAATTTTTATATAATTAATAAAAAATTTTAAATATATTTTTTAAATTTATTCAAAATTTTAAATTTTAA</p> <p>TTTTATTCATATTTTCAAATAAATATTTTTAATTTCTTATTTTTTTATAGATAATTTTAAATCTTTGTAA</p> <p>ATAGAATATATATCAAGTATTAAATATTAATTTTTAAAAATTAAAAAAATATATTTTAAAAATAAAAAAGTA</p> <p>AACTAATATTTTTATAATAAAAGATTAAGATTAAAAATTTAAAAAATTAACCACATTTAATCCAATAAAAAAT</p> <p>TGTGGTATCAATTTATGTGTTTTTTAAAT</p> <p>ACGATAGAGTCGTGATTACTCTTTGGCAGTTTAGCTAACTTGAGTCTTGACAGTTTTTTTTGTACATTGTA</p> <p>TTTTATTTATTTGTCCCGTAGTCATTTATGTATATTAAGGGGGCTTTTGCAATTATGGAAATTATATA</p> |
| CrMTP8, I-Pro |                                                                                                                                                                                                                                                                                                                                                                                                                                                                                                                                                                                                                                                                                                                                                                                                                                                                                                                                                                                                                                                                                                                                                                                                                                                                                                                                                                                                                                                                                                                                                                                                                                                                                                                                                                                                                                                                                                                                                                                                                                                                                                                                                                                                                                                                                                                                                                                                                                                                                                                                                                                                                                                                                                                                                                                                                                                                                                                                                                                                                                                                                                                                                                                                                                                                                                                                                                                                                                                                                                               |

CCACAAATGAAGTGGTCCATCTCAAATAATTTATTAATAATGTCCGCATGTTGTCCAAAGTCAGACTGTGC  
 TAAATGTTAAATTGGTGAAACGTAATAAATCAGTAGGCATCCATAGCCATGGCTTTTTCTTTTGGCTTTTG  
 CCATTTTTCTTACTGTAATTTACAATTTACAGATTCCATTCCTCCTCAATCATTTTTATTCACTTTCAAA  
 CTAGTATTGCTTAAAGATTTTCTATATTTTCACTCTTGAAAAACATATATATATAAAATCTGTCAATAATATA  
 ATTACTTTTTTCTATTTTATAAAAAATTTGAATTTTTCTTCCTTTTTATGAAAATATTTGGTTGAAAATATA  
 TTGTAAACATATTTCCATTCTCCAAAGTATTTTTGAAATATTTATATCAAATTTACTTATTTATGATGATGT  
 TAGTTTGTAATAATTTTTTATTTTTATTATAAAAAAATATTTATCTTATTTTTTATTTTTAAAAA  
 GGTTAATATGAATTTGTAAAAACAATAGAACTGTGTTTAGTAATTTCAATTATAAATTTTGAAAAACATAAAA  
 TAAAAATAAACACAAATTTATAATAAATAAATAAAAAATTTTTTACAGATTAAGCAGTTCCATAATTTTTG  
 AATTTTTTATTTGTAAAAAAATTA AAAAGGACTTCTTACTAAATAACACCTATGATTAAGAAGTTATTAATT  
 TTTTTAAAAATAAAAAATTTAGTTTATTACATTTTTATTCTATTTAGTATATATAGTTAAATAAAAAATACTA  
 ATATTTTCTTATTTTTTAAATGGTAAATAATTTAGAAATGAGCTAAAACATCTAACATAACAAAAGAGAATTT  
 ACCGTGTTTATATTGTTATTTTTGTTGCAAAAAGTTTTACTTTTATTAACTGTTTACTTAGAAAAAGAAT  
 ATATTTAAAAAACATTAGAACGACAAGATGTTATAAATCTAAATCAAAACGTTTCTACTTAATTGGGGATA  
 TATATCTTTCAGTTTTCTATTTTTCTCTAACCGCGAATGGTAAAGACACAAAATGAAATCTTTAGAAAAATGA  
 CCCTATTAAGAAGGAAATTAACTTTAAATTTTAACTTCTTCAAAGCATAGGATTCCTCAATAAACACAAAAT  
 GCAAATCATAAACATAATAAAGAAATATAGAAGACAGATTTGTTAAAGCATTATTTTTATTGAGATATTGT  
 AATATAATCAAAACATTATATTTTTTTTCATGGACAAGAACTCCCCAAAAGAAACCGTGTACTTGAAAAATGA  
 AAAACCAATGCATAGAACTTGACTACTTACCTAAACATTTTTTGTTTTTGTTGGGTAGAATATCTTTTTTA  
 GATTCATCTAGTTCGTCCACTTTCGACCTTTAGCAATGATAGTTTGCAAGAATATATAGATTTTATCTTTTCT  
 ATTAATTGCTATATATACAAAATATTTATCTATGAAAATTCACTTAAATTTTCAATTTTATAAACTTTCAC  
 GTTAATATTTAATTTTCTAACCTATAATTTATCTTAATATTTTTACTGCATTTTTTCACTAGCATTAATATTT  
 TAAATAAAAATTGTATAATATTTTGTCAATTA AAAAAAATGATGAACAACACTTACAGCGGTATTATATACT  
 CCTTTATCTGTGGTCGTGAAAACCTACCCCTTGTGAATTCAACGGAGGCGTGACTGAGCATCAAACCTCTTCAA  
 GAATATTCAAATTGAATTTTAACATAACGAGTGATGTTATATATATATATATATATATATATATATATATA  
 TATATATATATATATATATATATATATATATA  
 GTAAATAATGAAATATTTAAATGCTCGAAATATGTTATTTTACCTCTACGTTTGAATATGATTATGTTAA  
 ATTTAGCACGATTATACTAAACTAAATTTGTATGAATTTTTAATAATTTATAAATGTAACATGGTCATCTAA  
 TAGTTAGCATGATTGCATTAAAGAATAAATTTTATAAATTTTAAATTTGTAATTTTAGCATAGTCATAATGAT  
 AGTTAGCATGATCATGCCTACAATAATTTGTATAAATTTT TAGCCAGCATTTGAGTATGATCTTGTAATTC  
 TTAGCATGGTTTTGAAGTTCATTGATCAAGTTGTATAATTAAGTATGATTATGTAATTCATTGAGTAT  
 GGTGTTCAATCCATTGAACATAATCATGTCAAACATAAAGGTGAAGATAAGGAGGACAAAATTAATACGA  
 GTAAGCAAAACATGAAAAATATGATTGTACATGTAAATTCACACGTCATGCAATGTCACATAAATATAGTCA  
 GGTAAGATATTGAGTACGATGTACAATTTATTTGAAGATAAAAAATTTGACATTATTATAATGAAGAGATGAA  
 AAGTTCAAAATATTAACAATGTGTTTTGTATTAGATGAAATTAATTAATGAATAAAAGTTAGCAACCTTATTT  
 GATGTATAGAGATTATATATTTAATTTTATAGAACTATTGAGATAAGTACACATATAATAAGTAAAAATGAAT  
 AATGAGAAATTTTAATAAGAATGTAAGTTATTTAGTTAAGAATGATGAATGAATATATTGAATAGATGGTTGA  
 TCATGTATCATATACATACAAGATTACTGTGTAAATCATCGATATGAGGATAATTTACGAGATCTTTATGTG  
 AATGATACATACAAGATTATTATGTAAATCATCAATATGAGGATAATTTACGAGATTTTTTATATGAAGTAAT  
 TAAAAAATAAAGGGTTGACTCTTGATGGAAATAAATATTTTATAAAAAATAAAAAATTTTAACTCTAAAAAGT  
 ACCTGAGTTAAGTTT GAGTCTCGCATGATATAAAGTTATTTTTGTGCGTTGAATACAATTATCTTGATTAAAT  
 CCTGAAAATATCGTTACTAATTAATAAATTCATAATTTTTGTAAAATATTTTAAAAATAATGATAAATATAA  
 AATGATGTTAATATTGTTAAAAATAATTATCACCTTAATTATAATATTTTAAATTTTATATTTAAAAAATA

*CrMTP9.1-Pro*

*CrMTP10-Pro*

TTAAATTGATATATCTCAATAAAAAATAATATATATATATATAAACTTTAAATTTTAAATGATTATATGA  
TTTGAAAAATCAAATACAATATATGTGTTTATTATATATATATATAATATGAAGGTTGCGATAATTATATAAT  
TTAAAAATTATTTTATTATTAAAAATATTTATTTCAATATAATATATATAAAAAATATAAATAAAAAATAAA  
TATTAAATTTATTTTAAAAATTAATTTTAAACATTTAAAAATGATATATTTTATGAAAAATATAGGTGTTTAA  
TATATACGGGTTTAGTTTTGGATTGTTAGTGTAAGTAGACATTTTTTTTATCATGAACCAATTAATAATTTT  
GGCAGAGACAATTTTAAAAATAAATATTATTAAGTTAATAATTTTAAATTAGATAAAATTTATAAAAAATTATT  
TTGTTAATTAAATTGTTATTATGTAAAAAAATATAATAATATTTTTTAGTAAATTTATTATTTTAAAAATAT  
TTAAAAATCAATCTCAAAAGCTAAGAACGAAGCAGATTAACAAAAATGCAGACATCTTTAATTAATTAATTAA  
TATTTTTCTATATTTGTATTGTACAGTCGTAGTCCACTTTGTTCCAGGTGATCGTACATGCTTTTCAGCATAT  
TTTCTGGATCAAAATACAAAACCAATCAAACGATGCCACGTGTAAACCGCACTTGAAGTATCCTACAAAGTCA  
CACACTAGTGACTTCCTTAGAAGGTAACAA  
TTTAAACGGAAAGAATTATTAATATTATTCTTAACTTTAAAGATTTTTATTCTTAAATATATATGATCT  
TATCTCTGTTAAACCATAATCTAATAATAATAATATAAATATATTTTTATTATTTTAAAAATTAATTTTAAT  
TTATTTATTTTATATAATAAAAAATAAATAAATTCCTTATTTAATATATAAATTTTATAAAAAATCATAATAT  
ATAATATGAATTTATACTATATAATCATTATAATATAATATTATTATATATATTATTTTATATCAAAATAA  
ATATTAAATTTATATAAAAAATTATAATAATATATAAATTAATTATTTTAAATTTTAAATAATTAATAATATA  
TAAATAAAAAATTTATATAATTATATAATATTTTTTATTATAATCAGTATATATTATTATTATTTTCATAAAT  
ATTGTTTTATTTTATAATTATTAATATTATTTTTTAGTATTATAATAATAAATAAATTTTATTTCAAATTTTTT  
ATTATTATAAAAAATTAATTAACATCAATTATTTTATTTTATTTTATAAATTTATAAATAAATAACATTAGT  
TAATATATAAAAAATTATTTAATTTGTAATATTATAATATAATTTTATATTATGTAAATTTTATAATATAA  
TATATATTATTTTATATAAAAAATAATATTAATAATATAAAAAATTAATAATAAATAATGTATAAAATTAATT  
ATTTTATATTAAATTATTAATAATATATAAAATATAAAATTATATAATTATATATCATTATTATATTATAACA  
ATCAATATAACTATCATAATAATAATAATAATAATAATAATATTATTATTTTAAAGAATTTAATTTTTTA  
TTTATTTAATTTATATATATTAAAAATAGATAATATTAATTTTATATAAATTATATTAAATTTATAATATTA  
TGATATTTTATATTATATAACTATTTTATAATAATATTATAATATATATTATTTTATATAAAATAAATAT  
TTAATAATATAAAAAATATCAAAAAATAATATATAAAATTTTATCTTAACAGTAATAATTAATAATATA  
TAAATATAAATTTTATATAATTATATAATATTTTTTATATTATAACAATTATATTAAAAATCAGAATAACTTA  
ATAGAAAGATTTATAGATAAAATTTTAATTCATATATAATTATAAATTCAAAATTAATTTTATAGAAA  
ATAATAAATAAATAATATATGATATTTATATTTAATATATTTTACTTTTTCTATATTTTTTTTTCTATTATA  
TCTCGTCTCTTTTTTATTTTTTATCTTTTATATTTTTTCTTCATCTTAACATATCTTTTTTACTTTTTTT  
CCTTTCATCCTATCTTTTATAATATTTTTATCTGATATTATATATATATATATATATATATATATTTATC  
ATATTTTATCTTTTATTGTTTAATACATTTGAAATAGAATATATAAAAAATATTTTCTCATAAACTAACC  
AATTAACAATATACTAAAAATATATTGATCATAATCTAAAAGATAATAAATGTATATTTTCATATTATTAA  
TATTTTCATATATTCATTTTTTTTTATTCTATTCTTTTATATTCTAATACACGAATGAATGGAGTATAAAAAAT  
ATCATGCACAATAATTCTCCGAAGTAGTGAAACAAACATCAAGCAAGCACAGCATCGTACAATCCACAATTT  
TTTTTTCATTGCAGAAGCAACCCACAATCTCGTGATTCTTGTTACAAGGATTCAAATTTATATGTGTATGAA  
AACAAAAATAATAAAAAACAGTAGTTCTGGTTACAAGGATTATATATATATTAAGTAAAAATAATAAAACA  
CAGGGTCCACATGTTGCCACGTGTGGACCACAATTTCACTATCGTGAGGAAGATACACACAGTGAAGTTTCCT  
CTTCGTGTATAGGTCCTATCATTAGGGAG  
TTTTGAAAAATATTTGTAAAGTTGGGTTCAAATATAATGGTGGGAACGTCACGTTACTAATAAAATAAATA  
AAAATACATTAGAACTAACAAGTAAATATATTAATTTTAAATATTAATTAATTTTAAACTTTAAAAAGGT  
TAGAATTAGAATTAAATCTTAATAAGAATAAATTTTTTAAATCTTCTTTACCTTTTCATTAAGATATTTATTT  
AAAGAAAAATAAAAAAGATATTTATTTAATTTTTTATTTTAAATTTTAGATAAATCAATAAATACTACATT

CrMTP11-Pro

ATATACATATTTAACTTTTTTTTATGTTATAAAAAATTTAGAGAAGATGAATTTATTTTTTTACTTATTAGG  
GTAATATATATTTTAAGATTTCAGAAAATACTTACAAATCATCTACCATTAAGATTCTCTTATGATCTTATAAA  
TGAAGAATCTTATTCTTATCAACTTGATCAATGGTGGATTGAATCAAAACAATAATGATTGAATCTCATTAGA  
TTATGATAAGAATTGTGAAAGAAAGATTACTTTGTTACTTATAATATCTCATTGCATATTTAATTGAGTGAAG  
GATATTATTTTACTTTTACAAAACATACAATATTTTTTACTTCCTAGAGATATTTATAGATGGTCATTTTTTCTT  
CAAAATGAAAGTTAATAAAAAAGTACAATCTTAAGTAATAGAGATAAAAAATAATAGTTATTAAAAAGTTAA  
AGACCTTATCAAGTAGAAGTTATAGATCTCCTAGGATCTCTGGAGTGCATGAAGTTGAGTTGAATGATTCTAA  
TTCTAAGAGGATAAATAAAACCATGACCATAAAGTCAAAGAAATAATAGAAAAATCAATCACCTCTTTAAAGG  
CTCTCAAGGGAGAAGAGTTATTAGAAAGTTCAAAAGAATTAAAAAGAAAAATTTAAGACTAATGATGACCTA  
TCTATTATCATCACTTCACTTGACAAAAAAATATTTAGAGAACATTTGTGAGGTGAGGTGTAGGATTTTGTA  
TAGAGAAAGTTATAAAGTATACATTAAGAATACTCTTTTATGAATGGTTAGGGTTTTAAATTTAAAAA  
TGATAAGGTAAAGTGTAGAATTGTGTATAGGAAAGGGTGTTCATGGACAATATTTGGGAGTAAAGTTGGAGGA  
CCATTGATAAATAGGGTAAGATGAAATATTTTTAAGTGGTTGCAAATACTGGCTTTTCAAAACAAATATTTGGT  
ATAATTTTATCTCATGAACAAGAATATGCCAAGCAATTACCAACTAAATCAACAGTACCTTAAACAATTATC  
AATTAAACCAAAGATACCCCTCCCATGCTGCTGCCATATGCCAGAACAGTGATGCCTCCATCAACACTGTTAAT  
TACCTAACAAAGACCCTTTATATGCAACCATTTCATTTTTTTAATTAACAAGTATGAACACAGGATTCGTT  
TTATGTTATTATTATGTATATGATCATTTTCATTTTAGGAAATTTAAAAAAGAAATGAATGGAGAATC  
CTTATTAGAAACGATATAAAGTAATTCGAATAACTCATTGTTGAGTTTGGGTATTTCCTGGTAACTTGGACA  
ATGGACTAGTTGTGCTAAAAACAATAAAAAATTGTAAGTTTTTAAATTAAGTAAAGTTGAATGTTCTAATC  
CAAAATAAAAAATGAAGCTTGAATGTGAACACTGAAACACTAAACAATATTCCTAAGGTGGATTCCGTT  
CATATTAACATAGACTACTTAAATTCACAAAGTCAATTTTTTTTATAGACATTATATAATAGAAAGACAAATAT  
ATGGTTCATGCCAGAATTAGTAATCAAGCATGTCCATGCTTTCTATAGTTAAATTATTCTTCCCAAGTTTAC  
CAAGTTATAATATTCATATTAATACTACTACAGTAACCACTTGCTTTATGGTGCTTTAATTACTATATATATAC  
ATAAGGTACAAACAATGCTTAGAATTGAA  
ATTTTTATATTATTTAATTTCTTTTATATACAATTCATACAAAATTTATGAAAGATTAGTAAAAATTTGT  
GTAATTTAAAAATATTTGATATTATATTTTATATAAAATTTAAATATATAAATTTATGTATCAATTTTATTA  
AAATTTTAAAAATACAAATATAATTTATCCTAAAATTTATGTTAATACTATTTTATAAAATTTGAAATTTTCAT  
ATACAATTTTACAAATATTTTAGAATAAAAACTGATGTAGAATACCTGCTCATTTTATTTTAAATAATTAC  
ACTAATTTTAAAAATATAAGTTTGAATTTTTTTTAGTTGAAATAGATAGATCAAATATATTTTAAATTATTTT  
AAAATAAATTAATTTTAAATCTTATTATTAGATATATAATAGTATCAAGTATAAATTATATAAAACATTAA  
ATTAATTTATTTTAAATATAAAATTAATAATTAATAATATATTTACCCACCAGATTTGAAGTTTGAATAAGG  
CGATACCAGACGGTATTATGATGGGATGGGGATGTCATCCATATCATACAGTGGGCCCCAGAATAACAGAAT  
CCCCTCACCACACCACATAATGCCCTCCATTATTACGGTCACATATCGCATAACAGTATGTATTTTTTGAA  
TATTCTCATCCATTAAAGTCCCTATTTCAGCTATTGTCAGAAAATGATTTTCATGCAATAAAATGAGAATTATA  
TAACTTTTATCATTTTAAATTCATATATATGCACCTTAATATTCCATATTTAGTTATTTTATATATAAAAT  
TATTCTCCTCTATACTATAAATTTCTCTTACTTTTGATATACAGTGTATTTATAGTAAAAATATAATTA  
GTAAAGAAAATAATTAATTAATTTATTTGTAAGATAATCTTAACCTTTATTTAGCATGATGATTATTTTAA  
TTAAACGAAATAATTAATAATTTAATATAATAATGTTTAAATTTTAAATTTATAGTTAATTTTTTAAATATA  
TTTAATATTTTTTATTTATTATATAAGATATTAATTTTATATTATTATTTAATATTATAATTTTAAATAGTTA  
TTAAATATTTTATTTAATTTATTTATAATAAACATTTAATTTTTTATAAAAAATTTAAATGAATAAAACCTT  
TCATAGAAATATTTTAAATTTCAATTATGATAATTAATAATAATATATTTAAATTTTAAATAATTTAAAA  
GTATAAATTTTATTAATTTATATCATAAATATAAATAAATAAATAAATTTATCAAATTTTTTATAGTATATA  
ATCATCAAATCATTATAAATTTATTATATAATTTTTATAATAGAAATATATAAAAGAAATAAATATAAAAA

|                    |                                                                            |
|--------------------|----------------------------------------------------------------------------|
| <i>CrMTP12-Pro</i> | TATTATCCTTATTTTAAATATAATAATTTAATTTAAATAATATAAACTTAAATTAATCATTTAAATTATAAT   |
|                    | ATTTAAATTTTATTATTATTTTATCTTTATTAACATAATTTAAAAATTAATTTATTAAATATTTTATTTATTT  |
|                    | TAATAAAAAAATTTTCAGCTCACAAATTTTAAATAATTTTCAATTTTAAATTTTAAATTAACATATATGATAA  |
|                    | TTTACTAAACACATCCATAATAAAAAACATTAATTTTATAATTTATTATCATATAATAATTGTTTATTTTAAAG |
|                    | CCACTCCAACACAAAACCTCAATGCCTAAACCGCTTTAAAGCCACCGGACCCCACTGGCCACTGGTCTCTGAT  |
|                    | TCATGTGGCTCTTGATAGTAGCCACATCAAACCAATCTTTCGAACACTGAATCTCAGCCGTCCACGTGTAA    |
|                    | TAACTCAAATTTCTTAACAGACGCTCGATTAATCCACGCTCCAACACCAACCAACAAAACCGGAACACGTATCA |
|                    | ACATCTTCGAAAGTCACGATCCCGTGCATCACACGCGCTATCAGATCTCAGTCTTTTCACTTTTCATCTACC   |
|                    | AACATTGAATCCCCATGTTCTCGGTTCAAA                                             |
|                    | GAAATTTTAAATAAAAAATATGCATTTTCTAATTAATTTTATTTTAGGATTTTGATTTAAAAATTAATAAT    |
|                    | AATTTTATTAAGTTTACAGTGGAAAATATTAATAATTTATGATAGCAGCAAATTAACCATTTTAAATAATT    |
|                    | TTTACTATTTTACAATATGGGCATAAAAAATTACTTATCTTTATTCATTTTCTGGATTACTTTTGATTAT     |
|                    | ATTTCTTACTCATGCAATTACATTTTAATGTCTAAACTTATTAACATTATACAAGATTGTAAATTTATATGT   |
|                    | AAATGATTTATTTTAAATTACACAAAAATGTTTGTATCATCATGGTTTGGTAATAAATACTGATATTTCGCT   |
|                    | TTGAAAATGATTTAAATACTAACTTTTGATGATGAAAAATATCTAAGTTCTTCTATTAGGAGAAATTTTGT    |
|                    | TTATAAAGAGTTTCTTAATGTTTGATTATTTTATAAGAATTTAAATGGAATGTATTAGTAATTTAAATATT    |
|                    | TTTATATTTTATTTAATTATAAATTATCATATTTTATAAATTATTAATTTTATAATAATTATATTATCATAA   |
|                    | TTTTTAATTAGTTGACAATGTAATTTTATATTAATAATATATCAAAAAATTAATTTAATTATTTTAACT      |
|                    | TAAAAATGTTGTTATGAAATATATTTATTTATTTCCCTTTTAAATGGATCTTATAACGATAATATACATTTAT  |
|                    | TTACTTTCTTAATTTTAAATTTTAAATTTATTAGTATTTATTTTATTTCTAAGAAAAGTATTGCTATAAATTA  |
|                    | GTTTTCTTCTTTTCTTATAATGTTCTTATATAGTGTTAGTCATATTAACATTGCTTTCGTGTTAATTTTCT    |
|                    | ATATTAAATTTGCTTATTACCATAATATTTATATTTTATTAATAATTATTTTGACTCACATAAAATCTTGA    |
|                    | TTAAGATATTTTCTATCAATATTTTATTTTCTTTATCAAAATTTATTTTACAGAAAATATATATTAATA      |
|                    | AACTAACAGTTATCCATATGTTACAAAGATTTTTTTTATATTAAATAAAATTTATGAATAAGATAAATTA     |
|                    | AAAAAGATACGTATCATTATTTTAAAGAATAAATGTTTATTATTTAAACAAAAATGAATTAAAGATATA      |
|                    | AATTTTAAATTAATAAAAAATTTTAAATTAATATTTATCATCTTTTTTTATAGAATATCAAAATTTAAAT     |
|                    | AAGATTAACATAAATTATAACAATCTTAAATTTAGTTTATATAAAAAGAAGATTTTCAATTTGATATATTA    |
|                    | TTTCAAAATTTAAATTTTAAATAAATAAATAATTTTAAAAAATAATTTCTACTATATTGATTAATAATATCA   |
|                    | TTTTTAAAAAGAAGTGATTAGTGAACGCATTTTCTTAATAAATATATTTCTATATTATCTCTCTTCCTT      |
|                    | TTATAGAATGTGATTTTTTTTGAAGTTATAGAATACAATTTTCACACAAAATTTTTTTATTATTAAATTTAA   |
|                    | TATTTAACCATATATTAATATATTTATTTAAATATATACCGATTATCTTTAATTTTATGTGCACATTAAAT    |
|                    | TGACTTTAAATGAATTATCTTCTACTAATAGTTATATAATTGGTATATAATAAAACAATAAGTTTAATATAAT  |
|                    | TATTAATAATAAAAAATACTATTTTATTTAATTTCTTCTTTAAAAAATACTATTTAGTTAACCTGACCTCAGC  |
|                    | TAACCTATCTAATCCTAGCTTCGCCTAACCTAGCTAATTAAGCCACTATTGAAGTTAACCTAGCTTCGCCTAA  |
|                    | CCTAGCTAATTAAGCCACTATTGAAGCTGCCGTACCTCATTGATCGTGGCTTGAAAGTTCACTCGATCTTTTA  |
|                    | TTTCGTTTCCAAATGCAAAATCACTTAACCGAGCAGGTGTTGATATTTCCCTTTTCTCCCCGTAGGGAACGT   |
|                    | TAGACCCATAGTCCACCTTCTCCACTGCG                                              |

**Table S2.** Primer sequences used in this study.

| Primer ID | Sequence (from 5' to 3')                  | Usage or purpose                                                                  |
|-----------|-------------------------------------------|-----------------------------------------------------------------------------------|
| CrMTP1F   | TACCGAGCTCGGATCCATGGTTTTTCTCCAACCTCAAAATG | Primer pair for construction of CrMTP1-pYES2 for functional verification in yeast |
| CrMTP1R   | GATATCTGCAGAATTCCTAGCGCTCTATCTGTATAG      |                                                                                   |
| CrMTP4F   | TACCGAGCTCGGATCCATGAAGCAAATGGAACATGAG     | Primer pair for construction of CrMTP4-pYES2 for functional verification in yeast |
| CrMTP4R   | GATATCTGCAGAATTCCTACTCAATTTGTATTGTTAC     |                                                                                   |
| CrMTP5F   | TACCGAGCTCGGATCCATGGAAGCCAGGGAGACTCC      | Primer pair for construction of CrMTP5-pYES2 for functional verification in yeast |
| CrMTP5R   | GATATCTGCAGAATTCATGCATCGTCGGTCTGCAC       |                                                                                   |



|                    |                                        |                                                                                              |
|--------------------|----------------------------------------|----------------------------------------------------------------------------------------------|
| CrMTP8.1F          | TACCGAGCTCGGATCCATGGACAGGAATTCGGGTTTCG | Primer pair for construction of CrMTP8.1-pYES2 for functional verification in yeast          |
| CrMTP8.1R          | GATATCTGCAGAATTCCTAATTGTTGGGCAGTTTGC   |                                                                                              |
| CrMTP10F           | TACCGAGCTCGGATCCATGGGCACTGAACTTAGAAC   | Primer pair for construction of CrMTP10-pYES2 for functional verification in yeast           |
| CrMTP10R           | GATATCTGCAGAATTCCTAATTGACTTGTGCTCCAGC  |                                                                                              |
| CrMTP11F           | TACCGAGCTCGGATCCATGTTGGAGCCGGTGGAGCTTC | Primer pair for construction of CrMTP11-pYES2 for functional verification in yeast           |
| CrMTP11R           | GATATCTGCAGAATTCCTAGGAGTGTGCTTGAGCATG  |                                                                                              |
| CrMTP12F           | TACCGAGCTCGGATCCATGGCCGATCAGCCTCACCAC  | Primer pair for construction of CrMTP12-pYES2 for functional verification in yeast           |
| CrMTP12R           | GATATCTGCAGAATTCCTTATCCAACAGATTCCACTTG |                                                                                              |
| CrEF- $\alpha$ RTF | GACCTTCTTCGTTTCTCGCA                   | Primer pair for qRT-PCR of reference gene <i>CrEF-<math>\alpha</math></i> in <i>C. rosea</i> |
| CrEF- $\alpha$ RTR | CGAACCTCTCAATCACACGC                   |                                                                                              |
| CrMTP1RTF          | AGGCTAACAGTCTTGCATATT                  | Primer pair for qRT-PCR of <i>CrMTP1</i> in <i>C. rosea</i>                                  |
| CrMTP1RTR          | CCATCCAGCAGCCCATAAA                    |                                                                                              |
| CrMTP4RTF          | GCTGAACCGGAGTGGTTTATAG                 | Primer pair for qRT-PCR of <i>CrMTP4</i> in <i>C. rosea</i>                                  |
| CrMTP4RTR          | TGGTGTCTTTCCATCAGAATG                  |                                                                                              |
| CrMTP5RTF          | TGGCTGCATCTAGGAAGAAAG                  | Primer pair for qRT-PCR of <i>CrMTP5</i> in <i>C. rosea</i>                                  |
| CrMTP5RTR          | CCTCAACTGCAAGGGAGAAT                   |                                                                                              |
| CrMTP6RTF          | GCATCCTACCGTGACTGAAAT                  | Primer pair for qRT-PCR of <i>CrMTP6</i> in <i>C. rosea</i>                                  |
| CrMTP6RTR          | CATGTCTCGGCTCCAACTATC                  |                                                                                              |
| CrMTP7RTF          | CATCATTGGTTGCTGTGAATGT                 | Primer pair for qRT-PCR of <i>CrMTP7</i> in <i>C. rosea</i>                                  |
| CrMTP7RTR          | CATGTCGGTTCCTCTGGATAAG                 |                                                                                              |
| CrMTP8RTF          | GCTGACTGCACTGATGTAGAA                  | Primer pair for qRT-PCR of <i>CrMTP8</i> in <i>C. rosea</i>                                  |
| CrMTP8RTR          | CGCTATTGACCCACTCCTTATT                 |                                                                                              |
| CrMTP8.1RTF        | GAACAGGCTCAACAAGAGAGAG                 | Primer pair for qRT-PCR of <i>CrMTP8.1</i> in <i>C. rosea</i>                                |
| CrMTP8.1RTR        | CCACTCCTAACCGTAGCATAGA                 |                                                                                              |
| CrMTP9RTF          | GATTAGCTGCTGCTGTCCTT                   | Primer pair for qRT-PCR of <i>CrMTP9</i> in <i>C. rosea</i>                                  |
| CrMTP9RTR          | ACTGTCTTCGCCCATGTATTT                  |                                                                                              |
| CrMTP9.1RTF        | GTCTCACCAGGATGAAATGAA                  | Primer pair for qRT-PCR of <i>CrMTP9.1</i> in <i>C. rosea</i>                                |
| CrMTP9.1RTR        | GCTCGCAATTGAGGCATAAAC                  |                                                                                              |
| CrMTP10RTF         | GGTATCAAGAAGTGGACTCGTATC               | Primer pair for qRT-PCR of <i>CrMTP10</i> in <i>C. rosea</i>                                 |
| CrMTP10RTR         | CAGCACCATGTTCCCTATGT                   |                                                                                              |
| CrMTP11RTF         | CTATCAGCAGCAGGTGAAGT                   | Primer pair for qRT-PCR of <i>CrMTP11</i> in <i>C. rosea</i>                                 |
| CrMTP11RTR         | TTTGTCTCGCTCCTCCTTTG                   |                                                                                              |
| CrMTP12RTF         | GGGTTCGTGTCCTTGTCTTCTA                 | Primer pair for qRT-PCR of <i>CrMTP12</i> in <i>C. rosea</i>                                 |
| CrMTP12RTR         | GCCAAACCCTCACACATTTTC                  |                                                                                              |
